# Supplementary material for: Network instability dynamics drive a transient bursting period in the developing hippocampus in vivo
Source: eLife. 2022 Dec 19;11:e82756. doi: 10.7554/eLife.82756 (PMC9762703; doi:10.7554/eLife.82756)
Supplement: Figure 1—source data 1. [file elife-82756-fig1-data1.xlsx]

## Sheet: 1a
Two-photon Ca2+ imaging in CA1
Cre Line:	Emx1
Indicator:	GCaMP6s
related to	Figure 1I
Recall		Precision		F1 score
D	ΔF	D	ΔF	D	ΔF
0.69231	1	1	0.56522	0.81818	0.72222
0.89474	1	1	0.6129	0.94444	0.76
0.9	0.9	0.9	0.29032	0.9	0.43902
1	1	0.84	0.5	0.91304	0.66667
1	0.93333	0.90909	0.90323	0.95238	0.91803
0.94444	0.88889	1	0.42105	0.97143	0.57143
0.95238	0.95238	0.90909	0.42553	0.93023	0.58824
0.9	1	0.94737	0.71429	0.92308	0.83333
1	0.94737	0.90476	0.28571	0.95	0.43902
0.98214	0.94643	0.7971	0.67949	0.88	0.79104
0.96667	0.96667	0.87879	0.50877	0.92063	0.66667
1	0.9375	0.7619	0.27778	0.86486	0.42857
0.98507	0.92537	0.825	0.67391	0.89796	0.77987
1	1	1	1	1	1
1	1	0.91667	0.88	0.95652	0.93617
1	0.90909	0.91667	0.52632	0.95652	0.66667
1	1	1	0.66667	1	0.8
0.85185	0.74074	0.92	0.76923	0.88462	0.75472
1	0.91667	0.92308	0.57895	0.96	0.70968
1	0.97297	0.94872	0.85714	0.97368	0.91139
