# Supplementary material for: Network instability dynamics drive a transient bursting period in the developing hippocampus in vivo
Source: eLife. 2022 Dec 19;11:e82756. doi: 10.7554/eLife.82756 (PMC9762703; doi:10.7554/eLife.82756)
Supplement: Figure 2—source data 1. [file elife-82756-fig2-data1.xlsx]

## Sheet: FOV_ID
Two-photon Ca2+ imaging in CA1
Cre Line:	Emx1
Indicator:	GCaMP6s
Mouse and FOV ID for all age groups
related to	Figures 2-5, Figure 3–figure supplement 1
P4	P11	P18
P4_Mouse1_FOV1	P11_Mouse1_FOV2	P18_Mouse1_FOV1
P4_Mouse1_FOV2	P11_Mouse2_FOV1	P18_Mouse2_FOV1
P4_Mouse1_FOV3	P11_Mouse2_FOV2	P18_Mouse3_FOV1
P4_Mouse1_FOV4	P11_Mouse3_FOV1	P18_Mouse4_FOV2
P4_Mouse2_FOV1	P11_Mouse3_FOV2	P18_Mouse4_FOV3
P4_Mouse2_FOV2	P11_Mouse4_FOV1	P18_Mouse5_FOV1
P4_Mouse2_FOV3	P11_Mouse4_FOV2	P18_Mouse5_FOV3
P4_Mouse3_FOV1	P11_Mouse5_FOV1	P18_Mouse5_FOV4
P4_Mouse3_FOV3	P11_Mouse5_FOV2	P18_Mouse6_FOV1
P4_Mouse4_FOV1	P11_Mouse6_FOV1	P18_Mouse6_FOV2
P4_Mouse4_FOV2	P11_Mouse6_FOV2	P18_Mouse6_FOV3
P4_Mouse5_FOV1		P18_Mouse6_FOV4
P4_Mouse5_FOV2
P4_Mouse5_FOV3
P4_Mouse5_FOV4
P4_Mouse6_FOV1
P4_Mouse6_FOV2
P4_Mouse6_FOV3
P4_Mouse6_FOV4

## Sheet: 1b#1
Two-photon Ca2+ imaging in CA1
Cre Line:	Emx1
Indicator:	GCaMP6s
Parameter:	CaT frequency
Unit:	1/min
related to	Figure 2C
P4	P11	P18
1.66489	4.40248	5.4973
2.43681	2.94704	3.87547
2.66776	2.70714	5.50291
2.32627	2.8686	4.90483
1.97195	2.9316	3.93884
2.82169	6.29385	5.37282
1.83006	6.25976	5.22572
1.39861	3.44482	3.83942
1.69968	3.49572	3.18847
1.28373	3.12486	4.90857
1.33083	4.64263	4.09034
1.28965		6.82493
0.94454
0.81878
0.66812
0.40742
0.96329
1.44325
0.79627

## Sheet: 1b#2
Two-photon Ca2+ imaging in CA1
Cre Line:	Emx1
Indicator:	GCaMP6s
Parameter:	Gini coefficient of CaT frequencies
Unit:
related to	Figure 2E
P4	P11	P18
0.28337	0.309146	0.328742
0.285113	0.189334	0.418917
0.252162	0.220122	0.525684
0.261079	0.215982	0.337196
0.258305	0.201351	0.349896
0.307474	0.251058	0.502072
0.417839	0.181539	0.27503
0.357342	0.192242	0.397338
0.40821	0.18665	0.506966
0.294841	0.347813	0.465223
0.286469	0.220152	0.437889
0.45444		0.363946
0.454474
0.367737
0.389685
0.475089
0.350867
0.456995
0.369447

## Sheet: 1b#3
Two-photon Ca2+ imaging in CA1
Cre Line:	Emx1
Indicator:	GCaMP6s
Parameter:	CV2 of CaTs
Unit:
related to	Figure 2G
P4	P11	P18
1.10001	0.990288	0.907406
1.12581	0.980766	0.929549
1.1635	0.984184	0.891847
1.11119	0.937819	0.957845
1.04412	0.989942	0.958557
1.06345	0.912452	0.924053
1.04909	0.933561	0.908003
1.07935	0.995829	0.946611
1.02637	0.991322	0.93621
0.917687	0.987935	0.897418
1.07151	0.9721	0.978451
1.08411		0.907966
1.00617
0.947122
1.10876
1.07031
1.12295
1.02058
1.1323

## Sheet: 1b#4
Two-photon Ca2+ imaging in CA1
Cre Line:	Emx1
Indicator:	GCaMP6s
Parameter:	Gini coefficient of CV2
Unit:
related to	Results section
P4	P11	P18
0.0687032	0.0603537	0.0690357
0.0851611	0.0680635	0.0809823
0.0672102	0.0661002	0.0716215
0.0791556	0.0630406	0.0844838
0.0676498	0.0824942	0.0711963
0.0828464	0.0543762	0.0700016
0.0721992	0.0367003	0.0884333
0.0742341	0.0458663	0.0624452
0.0919238	0.0399633	0.0627465
0.0174301	0.0668349	0.0913221
0.0709264	0.0410913	0.0840897
0.0831924		0.0861817
0.0815545
0.116042
0.0800382
0.10811
0.0854668
0.0855304
0.0880171

## Sheet: 1b#5
Two-photon Ca2+ imaging in CA1
Cre Line:	Emx1
Indicator:	GCaMP6s
Parameter:	ΔF/F0 noise
Unit:	ΔF/F0
related to	Results section
P4	P11	P18
0.102638	0.209069	0.104291
0.109368	0.110384	0.085981
0.141368	0.122626	0.0885748
0.122113	0.187617	0.114378
0.130617	0.0943624	0.106141
0.140526	0.136764	0.133358
0.118866	0.132193	0.122357
0.0987714	0.0948648	0.119229
0.129451	0.0975457	0.137823
0.116574	0.108811	0.147057
0.126412	0.0923832	0.139477
0.0715031		0.159658
0.0623186
0.0591365
0.0694751
0.0684855
0.081108
0.0889336
0.0827939

## Sheet: 1b#6
Two-photon Ca2+ imaging in CA1
Cre Line:	Emx1
Indicator:	GCaMP6s
Parameter:	Skewness of CaT frequency distributions
Unit:
related to	Results section
P4	P11	P18
1.34107	1.3444	1.93569
1.76831	0.568846	2.3445
0.92516	0.592194	1.41927
0.991532	1.18523	1.60365
1.12265	1.25095	1.5082
0.88316	0.837127	1.48297
1.02915	0.121616	0.531708
2.46339	1.08361	1.54006
3.7057	1.43361	2.02593
0.881954	1.07517	1.32251
1.69674	0.919041	1.0247
1.69245		0.738552
3.56741
1.1971
1.97029
3.12668
1.70353
2.26462
1.07612
