# Supplementary material for: Network instability dynamics drive a transient bursting period in the developing hippocampus in vivo
Source: eLife. 2022 Dec 19;11:e82756. doi: 10.7554/eLife.82756 (PMC9762703; doi:10.7554/eLife.82756)
Supplement: Figure 3—figure supplement 1—source data 1. [file elife-82756-fig3-figsupp1-data1.xlsx]

## Sheet: Figure 3-figure supplement 1
group ID	Age group
1	P4
2	P11
3	P18
Figure 3-figure supplement 1A: variable NB threshold defined by Δt					Figure 3-figure supplement 1B: fixed NB threshold defined as fraction of cells
group ID	Δt (frames)	NB time fraction (%)	NB duration (s)	NB size (%)	NB threshold (% of cells)	NB time fraction (%)	NB duration (s)	NB size (%)
1	1	0.11222	0.356406	0.05136	7	0.0670728	0.58766	0.0814524
1	1	0.1086	0.408161	0.07723	7	0.0925011	0.703998	0.117159
1	1	0.11049	0.336273	0.07499	7	0.129435	0.710725	0.115911
1	1	0.10747	0.265141	0.04142	7	0.0729391	0.427394	0.0514779
1	1	0.10855	0.294502	0.05503	7	0.0972774	0.548701	0.0669096
1	1	0.12962	0.321009	0.06196	7	0.132562	0.656609	0.0928641
1	1	0.04835	0.23746	0.06233	7	0.0634071	0.458803	0.0777892
1	1	0.07873	0.346878	0.06107	7	0.0545455	0.562339	0.0902884
1	1	0.05506	0.225198	0.04367	7	0.0704705	0.480421	0.0352652
1	1	0.0973	0.283077	0.0359	7	0.0308219	0.38693	0.0472983
1	1	0.09168	0.255153	0.03105	7	0.0216905	0.367963	0.0432216
1	1	0.02729	0.203596	0.05093	7	0.0290806	0.405884	0.0634755
1	1	0.05624	0.251376	0.02884	7	0.00725323	0.269679	0.0265001
1	1	0.04554	0.274489	0.04252	7	0.0249657	0.504812	0.0506684
1	1	0.04115	0.230676	0.02704	7	0.0077216	0.369228	0.0315188
1	1	0.02872	0.263426	0.02786	7	0.00528379	0.444253	0.0362617
1	1	0.1057	0.425864	0.04871	7	0.0372073	0.604963	0.0839156
1	1	0.07578	0.355901	0.06393	7	0.0544499	0.576602	0.0899507
1	1	0.06201	0.256077	0.02985	7	0.0169122	0.36348	0.0331745
2	1	0.14965	0.241265	0.04395	7	0.199989	0.465515	0.062981
2	1	0.1749	0.387132	0.06432	7	0.139796	0.636784	0.100275
2	1	0.12764	0.267213	0.03784	7	0.0980833	0.427475	0.0500596
2	1	0.15767	0.332311	0.04848	7	0.123484	0.54564	0.0748872
2	1	0.15387	0.270636	0.03557	7	0.0987534	0.403927	0.0483817
2	1	0.24612	0.43404	0.11782	7	0.353317	0.989688	0.182764
2	1	0.15483	0.245003	0.05127	7	0.435566	0.832449	0.11283
2	1	0.14391	0.308763	0.06256	7	0.193816	0.65345	0.0944896
2	1	0.1311	0.254762	0.0417	7	0.176397	0.489132	0.0573464
2	1	0.17194	0.291016	0.04574	7	0.125524	0.425984	0.0601812
2	1	0.12019	0.210899	0.03781	7	0.219105	0.455661	0.0615649
3	1	0.12652	0.195925	0.03442	7	0.366022	0.567755	0.0669204
3	1	0.13679	0.240328	0.03434	7	0.132583	0.424711	0.0464747
3	1	0.10833	0.182856	0.02612	7	0.285308	0.428691	0.0452745
3	1	0.13533	0.202069	0.02658	7	0.194694	0.366299	0.0396565
3	1	0.12031	0.208036	0.02739	7	0.108071	0.339569	0.0374776
3	1	0.1969	0.224039	0.03638	7	0.275568	0.424293	0.0484724
3	1	0.11662	0.198489	0.0344	7	0.220072	0.405661	0.0545797
3	1	0.09779	0.186911	0.02644	7	0.116196	0.311718	0.0293092
3	1	0.14296	0.240604	0.0354	7	0.121369	0.394014	0.0403022
3	1	0.12008	0.18843	0.0312	7	0.25314	0.417184	0.0432459
3	1	0.07212	0.172347	0.02813	7	0.145591	0.318506	0.0295035
3	1	0.08079	0.165935	0.03559	7	0.404388	0.516728	0.0756875
1	2	0.13327	0.585825	0.07303	8	0.0430457	0.515907	0.0871245
1	2	0.15252	0.63605	0.09162	8	0.0758367	0.615649	0.10934
1	2	0.13579	0.579461	0.10785	8	0.104249	0.624865	0.111455
1	2	0.13196	0.414012	0.05378	8	0.0528701	0.417153	0.0552787
1	2	0.10026	0.3922	0.06619	8	0.0615428	0.457881	0.0702283
1	2	0.15445	0.511034	0.08201	8	0.108048	0.626284	0.0956086
1	2	0.09307	0.432451	0.07828	8	0.0634071	0.458803	0.0677652
1	2	0.12594	0.590167	0.07507	8	0.041201	0.4617	0.084451
1	2	0.10831	0.384443	0.0512	8	0.0344344	0.410815	0.0460375
1	2	0.09098	0.392064	0.04457	8	0.0174955	0.297152	0.0428136
1	2	0.07782	0.359071	0.03888	8	0.0121497	0.337722	0.0469705
1	2	0.05564	0.372304	0.05954	8	0.0290806	0.405884	0.0532959
1	2	0.10659	0.431625	0.03527	8	0.00725323	0.269679	0.0159186
1	2	0.0808	0.460408	0.04844	8	0.0120713	0.398244	0.0591445
1	2	0.07743	0.411377	0.03148	8	0.00401946	0.326741	0.0330322
1	2	0.05105	0.447868	0.03123	8	0.00255667	0.322442	0.0344588
1	2	0.10659	0.664711	0.06793	8	0.0300302	0.546862	0.0806452
1	2	0.12578	0.58058	0.07075	8	0.0455342	0.630553	0.102311
1	2	0.1072	0.519875	0.04167	8	0.00981997	0.343938	0.0358293
2	2	0.14755	0.324522	0.05294	8	0.136672	0.392361	0.0591629
2	2	0.23226	0.680132	0.09466	8	0.114718	0.587872	0.0962171
2	2	0.19167	0.44883	0.05355	8	0.0704908	0.37698	0.0443774
2	2	0.19496	0.54009	0.07059	8	0.0997818	0.509103	0.0695615
2	2	0.18736	0.42384	0.04983	8	0.0556099	0.352459	0.0471333
2	2	0.249	0.617386	0.15167	8	0.316715	0.88716	0.174159
2	2	0.19536	0.35907	0.06878	8	0.317739	0.602075	0.0960556
2	2	0.20244	0.52778	0.0876	8	0.15465	0.564941	0.087748
2	2	0.22274	0.451091	0.06043	8	0.0987507	0.398582	0.0573652
2	2	0.14209	0.384402	0.05796	8	0.0852943	0.38693	0.0592255
2	2	0.14544	0.305178	0.04974	8	0.153557	0.392436	0.057036
3	2	0.16114	0.283911	0.04547	8	0.264733	0.439086	0.053864
3	2	0.16525	0.357731	0.0453	8	0.0703586	0.373439	0.0489618
3	2	0.2095	0.300163	0.03906	8	0.145387	0.319886	0.0384174
3	2	0.17473	0.288168	0.0356	8	0.100138	0.30144	0.0352601
3	2	0.14856	0.300608	0.03625	8	0.0686356	0.279223	0.0290584
3	2	0.19557	0.30052	0.04417	8	0.185374	0.352579	0.0418843
3	2	0.1381	0.280778	0.04446	8	0.145843	0.340102	0.0486683
3	2	0.15607	0.288278	0.03475	8	0.0638903	0.27028	0.0262598
3	2	0.17419	0.363237	0.04605	8	0.0749436	0.334534	0.0379444
3	2	0.09779	0.233858	0.03676	8	0.152726	0.316612	0.0356347
3	2	0.11475	0.25831	0.03583	8	0.0758403	0.290349	0.0314101
3	2	0.17883	0.268426	0.04956	8	0.404388	0.516728	0.0656406
1	3	0.14795	0.810181	0.09027	9	0.0349239	0.448162	0.0770384
1	3	0.15817	0.8231	0.10859	9	0.0605847	0.585514	0.115259
1	3	0.15484	0.856212	0.13538	9	0.0799387	0.47915	0.0941406
1	3	0.14275	0.536592	0.06254	9	0.0387354	0.434767	0.0614584
1	3	0.15357	0.616697	0.07843	9	0.0387833	0.388707	0.0755997
1	3	0.17128	0.74065	0.10308	9	0.0829037	0.521198	0.0871662
1	3	0.06341	0.458803	0.08874	9	0.0343795	0.434508	0.0941607
1	3	0.10158	0.902837	0.11786	9	0.041201	0.4617	0.0743901
1	3	0.07047	0.480421	0.05794	9	0.0344344	0.410815	0.0355544
1	3	0.13982	0.623471	0.05531	9	0.0174955	0.297152	0.0322951
1	3	0.12589	0.545969	0.04589	9	0.0121497	0.337722	0.0364976
1	3	0.08612	0.5175	0.06497	9	0.0290806	0.405884	0.0428926
1	3	0.08199	0.519906	0.03843	9	0.00220751	0.225709	0.0158814
1	3	0.11289	0.714801	0.05745	9	0.0120713	0.398244	0.0488054
1	3	0.11371	0.600217	0.03486	9	0.00401946	0.326741	0.0224062
1	3	0.07346	0.588243	0.03158	9	0.00178967	0.361135	0.036708
1	3	0.10633	0.869628	0.08497	9	0.020209	0.460017	0.0777502
1	3	0.12609	0.765166	0.08485	9	0.0375736	0.548442	0.0944191
1	3	0.08011	0.610906	0.05118	9	0.00518276	0.245056	0.029533
2	3	0.19999	0.465515	0.06481	9	0.136672	0.392361	0.048824
2	3	0.22925	0.854408	0.11402	9	0.0934707	0.57604	0.0978736
2	3	0.23492	0.661389	0.06936	9	0.047813	0.328963	0.0384488
2	3	0.25115	0.840175	0.09665	9	0.0646217	0.438562	0.0658573
2	3	0.25947	0.659008	0.06748	9	0.0427768	0.349937	0.0436942
2	3	0.28204	0.823167	0.17347	9	0.282035	0.823167	0.169573
2	3	0.26456	0.52779	0.08894	9	0.264565	0.52779	0.0855486
2	3	0.19382	0.65345	0.10235	9	0.119847	0.517979	0.0867833
2	3	0.22702	0.562662	0.07005	9	0.0727191	0.382998	0.0562339
2	3	0.17981	0.545025	0.07316	9	0.0571852	0.320455	0.0527931
2	3	0.21911	0.45566	0.06295	9	0.106344	0.357498	0.0546315
3	3	0.18076	0.355342	0.0546	9	0.180755	0.355342	0.0450485
3	3	0.17942	0.447153	0.05179	9	0.0508371	0.356289	0.0456387
3	3	0.20797	0.365963	0.04529	9	0.0969064	0.286024	0.0318391
3	3	0.19469	0.366299	0.04309	9	0.0463589	0.255063	0.0327926
3	3	0.1588	0.387813	0.04444	9	0.028422	0.263102	0.0345424
3	3	0.27557	0.424292	0.05474	9	0.111247	0.308316	0.0400063
3	3	0.22007	0.405661	0.05597	9	0.0914546	0.322442	0.0491068
3	3	0.1162	0.311718	0.0364	9	0.0308436	0.208476	0.0200038
3	3	0.19737	0.481917	0.05481	9	0.0464259	0.319593	0.0388556
3	3	0.15273	0.316612	0.04365	9	0.0818496	0.253676	0.0310595
3	3	0.14559	0.318506	0.03883	9	0.0374061	0.243537	0.0306174
3	3	0.16368	0.317413	0.0563	9	0.267236	0.374142	0.0526179
1	4	0.15959	1.12017	0.11167	10	0.0294416	0.461769	0.0775844
1	4	0.18373	1.06539	0.12243	10	0.0498517	0.562084	0.115798
1	4	0.16853	1.02582	0.14078	10	0.0605563	0.428373	0.0904655
1	4	0.15268	0.68739	0.07277	10	0.0295641	0.436292	0.0649527
1	4	0.13748	0.706457	0.08682	10	0.0387833	0.388707	0.0653286
1	4	0.17948	0.905491	0.1162	10	0.0651236	0.483858	0.0874629
1	4	0.09144	0.666711	0.09952	10	0.0343795	0.434508	0.0840959
1	4	0.12394	1.10149	0.11871	10	0.0281902	0.440345	0.0807546
1	4	0.1029	0.62248	0.06514	10	0.0116116	0.293359	0.047619
1	4	0.1212	0.666585	0.05877	10	0.00915724	0.271182	0.0380867
1	4	0.10174	0.632716	0.05256	10	0.00674568	0.288207	0.0351166
1	4	0.11652	0.723669	0.07111	10	0.00980392	0.289221	0.0555556
1	4	0.11311	0.695635	0.04321	10	0.000420477	0.171969	0.0106545
1	4	0.14376	0.819198	0.05526	10	0.00809328	0.362363	0.045177
1	4	0.14883	0.801193	0.03825	10	0.00232706	0.236457	0.0151515
1	4	0.0963	0.816492	0.03605	10	0.00119311	0.401261	0.0386131
1	4	0.13139	1.04941	0.08569	10	0.0160539	0.421655	0.072236
1	4	0.12689	1.00779	0.10433	10	0.0269065	0.558899	0.111888
1	4	0.10684	0.80184	0.05596	10	0.00236407	0.22356	0.0291667
2	4	0.17529	0.52632	0.06904	10	0.092796	0.334468	0.0436858
2	4	0.25688	1.17014	0.14123	10	0.0633777	0.470545	0.0920505
2	4	0.2154	0.751568	0.07625	10	0.0176929	0.23299	0.0357139
2	4	0.25606	0.960843	0.10492	10	0.0381305	0.331805	0.0544357
2	4	0.26143	0.785987	0.07576	10	0.022855	0.28209	0.0388548
2	4	0.30525	1.0138	0.19183	10	0.250927	0.78351	0.17017
2	4	0.26103	0.622925	0.09953	10	0.211972	0.473402	0.0782835
2	4	0.22411	0.810439	0.11158	10	0.0933845	0.473158	0.0844287
2	4	0.22761	0.665325	0.077	10	0.0531084	0.366982	0.0543056
2	4	0.20489	0.715337	0.08749	10	0.0571852	0.320455	0.0422686
2	4	0.20916	0.521046	0.06807	10	0.0708654	0.319548	0.0506641
3	4	0.26768	0.505986	0.06885	10	0.115101	0.292067	0.0366833
3	4	0.18742	0.544044	0.05911	10	0.0255541	0.294692	0.0439394
3	4	0.26733	0.471998	0.05355	10	0.0382597	0.233291	0.0293407
3	4	0.25911	0.504903	0.05624	10	0.0202902	0.231037	0.0322061
3	4	0.16575	0.470154	0.05146	10	0.0190222	0.26256	0.0323734
3	4	0.24432	0.493739	0.06014	10	0.0631579	0.27078	0.0368063
3	4	0.21001	0.436971	0.05825	10	0.0589374	0.308027	0.0486992
3	4	0.14569	0.41671	0.04417	10	0.0122948	0.188295	0.0203568
3	4	0.20617	0.564982	0.0595	10	0.0246802	0.261138	0.0352489
3	4	0.11925	0.340782	0.04673	10	0.0391994	0.234804	0.0320255
3	4	0.16592	0.392164	0.04388	10	0.01724	0.220525	0.0322015
3	4	0.14486	0.3497	0.06035	10	0.163683	0.317413	0.0506345
1	5	0.16541	1.51184	0.13931	11	0.0233503	0.423781	0.0719278
1	5	0.18359	1.41494	0.15577	11	0.0451914	0.509538	0.102164
1	5	0.20215	1.42998	0.16396	11	0.0605563	0.428373	0.080246
1	5	0.20501	0.878336	0.07959	11	0.0226586	0.419924	0.0684744
1	5	0.17761	0.924426	0.0962	11	0.0259501	0.398359	0.0788244
1	5	0.18569	1.06875	0.12471	11	0.0485008	0.435592	0.086307
1	5	0.11892	0.867121	0.10913	11	0.0343795	0.434508	0.0738048
1	5	0.14379	1.51263	0.13918	11	0.0281902	0.440345	0.070426
1	5	0.13654	0.761577	0.06981	11	0.0116116	0.293359	0.0369181
1	5	0.15887	0.922065	0.06801	11	0.00491364	0.270237	0.0446622
1	5	0.13566	0.788372	0.05591	11	0.00372689	0.286615	0.043196
1	5	0.06035	0.705693	0.07786	11	0.00980392	0.289221	0.0449438
1	5	0.1438	0.911836	0.0488	11	0	NaN	NaN
1	5	0.11029	0.960161	0.06349	11	0.00521262	0.251339	0.0346387
1	5	0.10207	0.864323	0.04236	11	0.000528877	0.107481	0.0113819
1	5	0.11846	0.956148	0.0357	11	0.000681779	0.229292	0.027811
1	5	0.13045	1.21197	0.09354	11	0.012969	0.369017	0.0617827
1	5	0.15348	1.13547	0.10209	11	0.0227671	0.512324	0.106231
1	5	0.13357	1.0439	0.06357	11	0.00236407	0.22356	0.0182584
2	5	0.20419	0.629258	0.0733	11	0.0576953	0.298769	0.0428751
2	5	0.27795	1.365	0.1521	11	0.0524348	0.489516	0.0988987
2	5	0.24194	0.934709	0.08727	11	0.0106719	0.207455	0.0296958
2	5	0.28692	1.16944	0.11711	11	0.0291586	0.313322	0.0479151
2	5	0.25629	0.915277	0.08476	11	0.016133	0.241488	0.0277621
2	5	0.31967	1.19838	0.20317	11	0.224351	0.73537	0.165385
2	5	0.29914	0.754441	0.10897	11	0.168434	0.423589	0.0703288
2	5	0.24775	0.991893	0.1239	11	0.0725791	0.448899	0.0859053
2	5	0.27022	0.875816	0.08998	11	0.0289184	0.320237	0.0570868
2	5	0.22223	0.890056	0.10093	11	0.0356521	0.300946	0.0437213
2	5	0.20086	0.592428	0.07285	11	0.0455171	0.289433	0.048958
3	5	0.25783	0.541026	0.07227	11	0.067035	0.259737	0.0339782
3	5	0.23521	0.708709	0.07041	11	0.0176913	0.277061	0.0393952
3	5	0.24486	0.523384	0.05729	11	0.014484	0.225603	0.0329399
3	5	0.25773	0.567209	0.06073	11	0.0136582	0.212914	0.0245824
3	5	0.22276	0.640089	0.06354	11	0.0122365	0.259131	0.0304349
3	5	0.29573	0.569461	0.06475	11	0.0334626	0.244975	0.036757
3	5	0.19888	0.504852	0.06493	11	0.0393884	0.277744	0.0445242
3	5	0.1695	0.480265	0.04824	11	0.0046905	0.195689	0.0224107
3	5	0.21144	0.651257	0.064	11	0.0127163	0.246295	0.0385051
3	5	0.14838	0.423036	0.05334	11	0.0178744	0.204312	0.0317729
3	5	0.18015	0.449249	0.04804	11	0.0077501	0.234069	0.0396912
3	5	0.19563	0.43731	0.07003	11	0.0915267	0.267896	0.0491193
1	6	0.18876	1.99842	0.1531	12	0.0157022	0.40711	0.0798431
1	6	0.20025	1.52408	0.15784	12	0.0361531	0.440241	0.0907828
1	6	0.20543	1.55103	0.1658	12	0.0459921	0.392538	0.0807189
1	6	0.20414	0.991968	0.08429	12	0.0174795	0.348237	0.057814
1	6	0.15854	0.975946	0.09918	12	0.0259501	0.398359	0.0683565
1	6	0.19137	1.17598	0.12927	12	0.0367175	0.365959	0.0750946
1	6	0.14414	1.11081	0.12043	12	0.0194122	0.375524	0.0921369
1	6	0.12977	1.76042	0.16491	12	0.0203503	0.327816	0.0541576
1	6	0.17257	0.871985	0.07147	12	0.0036036	0.221103	0.0298392
1	6	0.13892	1.02851	0.07683	12	0.00290351	0.257954	0.0453625
1	6	0.11505	0.899777	0.06345	12	0.00152803	0.220335	0.0445076
1	6	0.07651	0.878868	0.08439	12	0.00980392	0.289221	0.0340909
1	6	0.11059	0.886821	0.04972	12	0	NaN	NaN
1	6	0.1321	1.15004	0.06724	12	0.00521262	0.251339	0.0236686
1	6	0.12577	0.992579	0.0435	12	0	NaN	NaN
1	6	0.07917	1.07945	0.04436	12	0.000511335	0.257954	0.0268375
1	6	0.15154	1.54451	0.10578	12	0.0100101	0.333452	0.0520617
1	6	0.15571	1.27413	0.10765	12	0.0191052	0.448615	0.093604
1	6	0.10957	1.1774	0.07409	12	0.00127296	0.200631	0.0175189
2	6	0.22258	0.743328	0.07962	12	0.0366245	0.277459	0.0408943
2	6	0.26938	1.3956	0.15085	12	0.0432245	0.485198	0.0981585
2	6	0.2649	1.20155	0.10321	12	0.00540616	0.2069	0.0315083
2	6	0.28577	1.2549	0.12012	12	0.0152764	0.277796	0.0465151
2	6	0.29247	1.01862	0.08599	12	0.00659985	0.193465	0.0248536
2	6	0.33169	1.31011	0.20897	12	0.197226	0.669235	0.159041
2	6	0.32219	0.936261	0.12252	12	0.100441	0.346276	0.065421
2	6	0.26812	1.1963	0.13611	12	0.0556088	0.419084	0.0847956
2	6	0.30103	1.04425	0.09788	12	0.0212533	0.322065	0.0591046
2	6	0.23351	1.08514	0.11201	12	0.0225002	0.272805	0.042042
2	6	0.23524	0.729376	0.0814	12	0.0296113	0.273626	0.0482008
3	6	0.31768	0.689876	0.08682	12	0.0373849	0.234293	0.0316527
3	6	0.23121	0.796992	0.07626	12	0.0125398	0.260773	0.0340909
3	6	0.27711	0.643931	0.06584	12	0.00885439	0.207903	0.0272246
3	6	0.30166	0.716902	0.07218	12	0.00551579	0.195208	0.0230003
3	6	0.2152	0.712365	0.06911	12	0.0051727	0.228473	0.0343296
3	6	0.33784	0.699112	0.07381	12	0.0188366	0.203019	0.0298598
3	6	0.24649	0.665661	0.0796	12	0.0242911	0.245251	0.0393575
3	6	0.18947	0.545797	0.05238	12	0.0017767	0.179134	0.0241228
3	6	0.21655	0.770914	0.07129	12	0.00767494	0.224883	0.0381147
3	6	0.17371	0.50331	0.05976	12	0.0178744	0.204312	0.0207703
3	6	0.19367	0.521228	0.05121	12	0.0077501	0.234069	0.0287786
3	6	0.24373	0.524802	0.07805	12	0.0915267	0.267896	0.0383139
1	7	0.18971	2.36289	0.16838	13	0.0127242	0.404127	0.0791022
1	7	0.19969	1.76206	0.17035	13	0.0283858	0.48008	0.109373
1	7	0.2108	1.83911	0.18219	13	0.0341656	0.377847	0.0847094
1	7	0.2022	1.10366	0.08973	13	0.0134873	0.383859	0.0664094
1	7	0.19023	1.31078	0.11702	13	0.0173001	0.403466	0.0822755
1	7	0.19684	1.31866	0.13668	13	0.0256707	0.333019	0.0740204
1	7	0.10822	1.12725	0.1301	13	0.0194122	0.375524	0.0817016
1	7	0.14479	1.96407	0.16316	13	0.0126772	0.311182	0.0616936
1	7	0.12272	0.941224	0.07921	13	0.0036036	0.221103	0.0186879
1	7	0.1658	1.3485	0.08881	13	0.00290351	0.257954	0.0343897
1	7	0.14229	1.05221	0.06776	13	0.00152803	0.220335	0.0335249
1	7	0.09327	1.01736	0.08403	13	0.00980392	0.289221	0.0229885
1	7	0.13487	1.19911	0.05963	13	0	NaN	NaN
1	7	0.15309	1.47629	0.07814	13	0.00178326	0.22356	0.0380195
1	7	0.1483	1.2301	0.04912	13	0	NaN	NaN
1	7	0.09281	1.2827	0.04646	13	0.000170445	0.171969	0.0217657
1	7	0.15065	1.62017	0.10501	13	0.00566608	0.257954	0.0399827
1	7	0.15587	1.53052	0.12378	13	0.0154434	0.438974	0.0936589
1	7	0.12839	1.46277	0.08324	13	0.000272777	0.128977	0.0158046
2	7	0.23477	0.867221	0.08666	13	0.0218591	0.266937	0.042698
2	7	0.2847	1.56985	0.15882	13	0.0301842	0.412476	0.0914212
2	7	0.28007	1.3665	0.11137	13	0.00337008	0.187603	0.0271769
2	7	0.3085	1.44892	0.12927	13	0.0104874	0.260971	0.0402042
2	7	0.28489	1.14531	0.09227	13	0.00354437	0.178111	0.02183
2	7	0.33848	1.51906	0.22296	13	0.171268	0.605778	0.150903
2	7	0.29866	0.993009	0.12651	13	0.0745799	0.305106	0.056215
2	7	0.28188	1.32008	0.14072	13	0.04372	0.428513	0.0915843
2	7	0.28386	1.07774	0.09787	13	0.0159275	0.316265	0.058041
2	7	0.28361	1.3413	0.12464	13	0.0136677	0.249708	0.0407597
2	7	0.21645	0.786858	0.0847	13	0.0180601	0.238577	0.044447
3	7	0.30203	0.723152	0.0886	13	0.0206262	0.21887	0.0300075
3	7	0.2224	0.969468	0.09034	13	0.00562597	0.209903	0.0307157
3	7	0.30067	0.746058	0.07245	13	0.00333406	0.209802	0.0321098
3	7	0.28827	0.738693	0.07376	13	0.00216692	0.218268	0.0249533
3	7	0.25385	0.86439	0.07886	13	0.00283664	0.175408	0.0229885
3	7	0.3641	0.826156	0.08177	13	0.00797784	0.167321	0.0247401
3	7	0.23149	0.667776	0.07943	13	0.0141295	0.224174	0.0371148
3	7	0.20901	0.643462	0.0576	13	0.00078175	0.157638	0.0219802
3	7	0.21896	0.890445	0.07633	13	0.00767494	0.224883	0.0270585
3	7	0.19103	0.605611	0.06732	13	0.00821256	0.20882	0.0249527
3	7	0.19794	0.56193	0.05376	13	0.00355872	0.203648	0.0298496
3	7	0.20619	0.54864	0.08052	13	0.0485633	0.244547	0.0396403
1	8	0.19113	2.58319	0.17531	14	0.0103553	0.355558	0.0688271
1	8	0.21282	1.96331	0.17798	14	0.023443	0.446045	0.103278
1	8	0.2131	1.7992	0.17234	14	0.0262812	0.375205	0.0880021
1	8	0.19789	1.29259	0.10269	14	0.0113293	0.429923	0.0741058
1	8	0.17045	1.34225	0.11956	14	0.0173001	0.403466	0.0716043
1	8	0.22883	1.66979	0.15167	14	0.0256707	0.333019	0.0632532
1	8	0.126	1.34194	0.13809	14	0.0194122	0.375524	0.0710238
1	8	0.1568	2.37722	0.17892	14	0.0126772	0.311182	0.0507831
1	8	0.14935	1.06907	0.08419	14	0.0036036	0.221103	0.00727733
1	8	0.19022	1.66432	0.10059	14	0.00171233	0.247206	0.0361077
1	8	0.17013	1.24215	0.07247	14	0.000931723	0.268702	0.0445736
1	8	0.11096	1.12519	0.08343	14	0.00291468	0.252221	0.0439276
1	8	0.15747	1.27529	0.05757	14	0	NaN	NaN
1	8	0.17215	1.76903	0.08379	14	0.000823045	0.128977	0.029517
1	8	0.17009	1.4867	0.05391	14	0	NaN	NaN
1	8	0.10747	1.32227	0.04361	14	8.52224e-05	0.0859845	0.0103909
1	8	0.16677	1.99801	0.11603	14	0.00377739	0.286615	0.0435109
1	8	0.17434	1.71187	0.12517	14	0.0121	0.408426	0.0922304
1	8	0.14557	1.6788	0.08711	14	9.09256e-05	0.0859845	0.0116279
2	8	0.24607	0.945224	0.08781	14	0.0118228	0.208027	0.0365489
2	8	0.29573	1.79902	0.17333	14	0.023892	0.357586	0.0787001
2	8	0.28941	1.52771	0.1183	14	0.00217651	0.20504	0.0264492
2	8	0.30183	1.56247	0.13506	14	0.00484966	0.202317	0.0343357
2	8	0.31215	1.16193	0.08773	14	0.00195551	0.229292	0.025063
2	8	0.36657	1.77214	0.23925	14	0.148675	0.562406	0.146952
2	8	0.31309	1.11625	0.13245	14	0.0535619	0.293515	0.0543212
2	8	0.29228	1.51517	0.14942	14	0.0352349	0.397476	0.0871381
2	8	0.30556	1.20516	0.10318	14	0.0116968	0.297152	0.0553662
2	8	0.28322	1.53549	0.13765	14	0.00780092	0.253759	0.0449757
2	8	0.24152	0.890083	0.08918	14	0.0114595	0.223918	0.0406264
3	8	0.34779	0.952386	0.11053	14	0.0111418	0.200079	0.0264903
3	8	0.25175	1.12843	0.09686	14	0.00325358	0.206363	0.0274086
3	8	0.31597	0.858509	0.07924	14	0.00218627	0.229292	0.0322581
3	8	0.32024	0.822248	0.07828	14	0.000919299	0.171969	0.0162422
3	8	0.24412	0.905003	0.08076	14	0.000945548	0.162415	0.0272078
3	8	0.30748	0.828497	0.08123	14	0.00254848	0.179786	0.0396293
3	8	0.27214	0.851368	0.09495	14	0.00754863	0.181265	0.0313159
3	8	0.22003	0.68434	0.05965	14	0.000355341	0.429923	0.0820073
3	8	0.21633	0.898929	0.07467	14	0.00443943	0.220569	0.0292022
3	8	0.20435	0.638095	0.06714	14	0.00338164	0.234069	0.0380125
3	8	0.19921	0.638923	0.05871	14	0.00221431	0.300946	0.0445973
3	8	0.23584	0.608524	0.08457	14	0.0241439	0.203729	0.0378027
1	9	0.20616	3.01045	0.18729	15	0.00697124	0.369017	0.0798209
1	9	0.22582	1.9926	0.17075	15	0.0193475	0.392663	0.0936819
1	9	0.2362	2.08392	0.18539	15	0.0200394	0.374647	0.0969888
1	9	0.23155	1.51248	0.10674	15	0.00949504	0.398244	0.0692924
1	9	0.19448	1.63789	0.13399	15	0.0117697	0.339844	0.0681273
1	9	0.22988	1.77242	0.15653	15	0.0185166	0.328984	0.0669475
1	9	0.14378	1.44985	0.13384	15	0.0107039	0.30746	0.077278
1	9	0.16964	2.24221	0.15812	15	0.00783987	0.288662	0.0569561
1	9	0.17477	1.25107	0.08932	15	0.000600601	0.257954	0.0196078
1	9	0.17064	1.6561	0.1012	15	0.00104229	0.240757	0.0371517
1	9	0.14576	1.33447	0.07874	15	0.000670841	0.257954	0.0431373
1	9	0.12911	1.34067	0.08914	15	0.00291468	0.252221	0.0326797
1	9	0.12341	1.20174	0.05745	15	0	NaN	NaN
1	9	0.12826	1.54607	0.08344	15	0.000823045	0.128977	0.0180995
1	9	0.19177	1.71308	0.05656	15	0	NaN	NaN
1	9	0.1217	1.65927	0.04965	15	0	NaN	NaN
1	9	0.16022	2.04515	0.11722	15	0.00264417	0.277796	0.0432054
1	9	0.1702	1.87587	0.13513	15	0.0100302	0.416694	0.0974907
1	9	0.16194	1.93846	0.09288	15	0	NaN	NaN
2	9	0.25369	1.08959	0.09582	15	0.00651568	0.226853	0.0402776
2	9	0.3074	1.97179	0.1801	15	0.0184206	0.321646	0.0706647
2	9	0.29579	1.6172	0.12004	15	0.000772309	0.315277	0.0666018
2	9	0.32177	1.71581	0.13892	15	0.00206111	0.182717	0.0299598
2	9	0.30628	1.37247	0.09646	15	0.000366659	0.128977	0.0184049
2	9	0.3711	1.92008	0.24327	15	0.12924	0.544858	0.147252
2	9	0.32031	1.25819	0.14279	15	0.0265872	0.255165	0.054367
2	9	0.30201	1.67192	0.15272	15	0.0268936	0.357313	0.081733
2	9	0.28764	1.27739	0.1071	15	0.00617192	0.260051	0.0559989
2	9	0.28161	1.57807	0.136	15	0.00470634	0.216444	0.0400438
2	9	0.26091	1.0239	0.09675	15	0.00655482	0.192122	0.0351067
3	9	0.31906	0.93397	0.10842	15	0.00570902	0.183829	0.0239105
3	9	0.24341	1.17403	0.09852	15	0.00135566	0.24567	0.0396158
3	9	0.32149	0.93142	0.08224	15	0.000983822	0.221103	0.0371374
3	9	0.29805	0.907636	0.08551	15	0.000328321	0.214961	0.0261438
3	9	0.23082	0.914964	0.08064	15	0.000611825	0.157638	0.0210496
3	9	0.32787	0.921841	0.08519	15	0.00166205	0.257954	0.0538173
3	9	0.2524	0.852653	0.09443	15	0.0042582	0.164492	0.0261271
3	9	0.23076	0.694506	0.06	15	0.000142136	0.171969	0.0216718
3	9	0.26998	1.16861	0.08742	15	0.00233258	0.222127	0.0359477
3	9	0.21573	0.69815	0.07202	15	0.00179434	0.2484	0.0408694
3	9	0.19779	0.661684	0.05937	15	0.00102807	0.1863	0.0315638
3	9	0.26164	0.704184	0.09181	15	0.0105572	0.173478	0.0396898
1	10	0.20717	3.17107	0.18869	16	0.00595601	0.328984	0.0658776
1	10	0.22525	2.53973	0.2095	16	0.0172292	0.419604	0.0981481
1	10	0.22974	2.2271	0.19666	16	0.0200394	0.374647	0.0862387
1	10	0.22831	1.65403	0.11322	16	0.00744497	0.329607	0.0556646
1	10	0.21824	1.90403	0.14515	16	0.0117697	0.339844	0.0570335
1	10	0.23041	2.0693	0.17524	16	0.0133614	0.312001	0.0684274
1	10	0.11112	1.44289	0.14384	16	0.0107039	0.30746	0.0662932
1	10	0.1553	2.7604	0.19521	16	0.00550459	0.283749	0.0570673
1	10	0.201	1.39239	0.0914	16	0.000600601	0.257954	0.00793651
1	10	0.19052	1.93013	0.10897	16	0.000595593	0.229292	0.0340434
1	10	0.16887	1.51594	0.08349	16	0.000223614	0.171969	0.037037
1	10	0.14613	1.62121	0.09737	16	0.00291468	0.252221	0.021164
1	10	0.14191	1.48819	0.06522	16	0	NaN	NaN
1	10	0.1428	1.86479	0.0914	16	0.000411523	0.0859845	0.010989
1	10	0.13952	1.59737	0.05862	16	0	NaN	NaN
1	10	0.13474	1.88808	0.05193	16	0	NaN	NaN
1	10	0.17527	2.44266	0.13075	16	0.00163687	0.319371	0.0591398
1	10	0.18675	2.10125	0.14037	16	0.0076421	0.294804	0.068491
1	10	0.13893	2.26525	0.11343	16	0	NaN	NaN
2	10	0.21386	1.02327	0.08944	16	0.00383585	0.190208	0.033763
2	10	0.31862	2.24201	0.19569	16	0.0134963	0.353492	0.0813946
2	10	0.2986	1.71687	0.12328	16	0.000631889	0.257954	0.0522104
2	10	0.33723	1.86848	0.14258	16	0.000969932	0.152861	0.0231358
2	10	0.32596	1.47	0.09819	16	0	NaN	NaN
2	10	0.37241	2.04515	0.23943	16	0.111798	0.498159	0.137999
2	10	0.32457	1.35593	0.14892	16	0.0177248	0.22971	0.0485906
2	10	0.31155	1.7037	0.14935	16	0.0197987	0.369913	0.092313
2	10	0.30904	1.49546	0.11881	16	0.00482803	0.297875	0.0632972
2	10	0.27967	1.68779	0.14108	16	0.00270776	0.190071	0.0362141
2	10	0.23107	1.02957	0.09809	16	0.0036212	0.178757	0.0318935
3	10	0.35064	1.09143	0.11914	16	0.00267035	0.166237	0.0203624
3	10	0.26591	1.33327	0.1062	16	0.000745611	0.236457	0.0348639
3	10	0.32215	1.00355	0.08602	16	0.000710538	0.22356	0.030722
3	10	0.32195	1.01586	0.0911	16	0.000196993	0.128977	0.00462963
3	10	0.2578	1.02452	0.08659	16	0.000278102	0.0859845	0.00385154
3	10	0.34526	1.09358	0.09605	16	0.00110803	0.286615	0.0543735
3	10	0.28307	0.967326	0.1044	16	0.00183877	0.163371	0.0231092
3	10	0.23787	0.795001	0.06697	16	7.10682e-05	0.0859845	0.0100251
3	10	0.25967	1.1965	0.08942	16	0.00127916	0.20882	0.0322319
3	10	0.22312	0.75746	0.07602	16	0.000759144	0.189166	0.0304073
3	10	0.19462	0.722212	0.06314	16	0.000316331	0.114646	0.0321332
3	10	0.21114	0.674964	0.0891	16	0.0105572	0.173478	0.0282576
1	11	0.20778	3.71792	0.21175	17	0.00460237	0.365434	0.0785979
1	11	0.23358	2.7886	0.21799	17	0.0139811	0.370107	0.087946
1	11	0.22788	2.38578	0.20648	17	0.0159877	0.392304	0.0959149
1	11	0.22432	1.75257	0.11765	17	0.0058265	0.331655	0.0551307
1	11	0.19881	1.94436	0.14984	17	0.00815372	0.412009	0.0856282
1	11	0.2545	2.3636	0.18697	17	0.00978432	0.33319	0.075124
1	11	0.12509	1.6939	0.15429	17	0.0107039	0.30746	0.0550437
1	11	0.1643	3.25749	0.21252	17	0.00550459	0.283749	0.0457066
1	11	0.15556	1.42149	0.09518	17	0	NaN	NaN
1	11	0.20876	2.31828	0.1204	17	0.000595593	0.229292	0.0224054
1	11	0.1913	1.7584	0.0897	17	0.000223614	0.171969	0.0254351
1	11	0.16316	1.72179	0.09582	17	0.000596184	0.154772	0.0361446
1	11	0.15978	1.74262	0.0715	17	0	NaN	NaN
1	11	0.15652	2.00221	0.09184	17	0	NaN	NaN
1	11	0.15549	1.97496	0.06588	17	0	NaN	NaN
1	11	0.14735	2.06482	0.05269	17	0	NaN	NaN
1	11	0.16646	2.49828	0.13516	17	0.00113322	0.38693	0.0648076
1	11	0.17895	2.19651	0.1484	17	0.00589078	0.353492	0.0896921
1	11	0.15203	2.24635	0.10691	17	0	NaN	NaN
2	11	0.21502	1.05979	0.09024	17	0.00383585	0.190208	0.0221215
2	11	0.3282	2.47567	0.20448	17	0.00784242	0.264095	0.0694512
2	11	0.30099	1.83391	0.12763	17	0.00035105	0.143308	0.024196
2	11	0.33129	1.95794	0.14349	17	0.000181862	0.0859845	0.0146923
2	11	0.31777	1.56336	0.10128	17	0	NaN	NaN
2	11	0.39308	2.37766	0.25215	17	0.0957286	0.455751	0.129336
2	11	0.32675	1.46499	0.15499	17	0.0127851	0.218268	0.0433874
2	11	0.31692	1.90753	0.15788	17	0.0154842	0.338695	0.0870699
2	11	0.32213	1.62242	0.12383	17	0.00388234	0.319371	0.0672511
2	11	0.2758	1.81203	0.14727	17	0.000902585	0.200631	0.0523893
2	11	0.24514	1.16712	0.10516	17	0.00187935	0.195854	0.0406069
3	11	0.32109	1.08241	0.1195	17	0.00138122	0.161221	0.0127175
3	11	0.25303	1.36587	0.10674	17	0.000271131	0.114646	0.010327
3	11	0.32171	1.08374	0.09024	17	0.00016397	0.128977	0.0205985
3	11	0.3387	1.0897	0.09473	17	0	NaN	NaN
3	11	0.28289	1.15692	0.0938	17	0	NaN	NaN
3	11	0.35468	1.19668	0.10145	17	0.00110803	0.286615	0.0429804
3	11	0.3093	1.05695	0.10783	17	0.000870996	0.193465	0.0225608
3	11	0.2471	0.874176	0.07173	17	0	NaN	NaN
3	11	0.24552	1.27531	0.0929	17	0.00082769	0.236457	0.0390132
3	11	0.22712	0.839689	0.08186	17	0.000276052	0.171969	0.034693
3	11	0.19241	0.72639	0.06164	17	0.000316331	0.114646	0.0204721
3	11	0.22859	0.699678	0.09022	17	0.00504911	0.152553	0.0252203
