# Supplementary material for: Network instability dynamics drive a transient bursting period in the developing hippocampus in vivo
Source: eLife. 2022 Dec 19;11:e82756. doi: 10.7554/eLife.82756 (PMC9762703; doi:10.7554/eLife.82756)
Supplement: Figure 3—source data 1. [file elife-82756-fig3-data1.xlsx]

## Sheet: 1c#1
Two-photon Ca2+ imaging in CA1
Cre Line:	Emx1
Indicator:	GCaMP6s
Parameter:	Time in continuous activity
Unit:	%
related to	Figure 3C
P4	P11	P18
6.29921	23.3129	86.9048
4.91803	2.12766	8.92857
9.21053	7.5	91.6084
5.40541	4.92958	76.9912
1.65289	11.5942	32.8571
7.5	24	87.7193
0	59.322	58.75
2.43902	11.236	42.2018
0	18.0233	8.69565
0	9.16031	65.0943
0.442478	27.957	26.1364
0.775194		97.5904
0
1.5873
0
0
0.729927
1.85185
0

## Sheet: 1c#2
Two-photon Ca2+ imaging in CA1
Cre Line:	Emx1
Indicator:	GCaMP6s
Parameter:	absolute Lomb-Scargle Bandpower at 0.1-0.5 Hz
Unit:
related to	Figure 3E
P4	P11	P18
0.000271993	0.00064884	0.000542857
0.000533941	0.000915036	0.000327955
0.000624618	0.000418761	0.000238989
0.000342275	0.000772771	0.000225943
0.000457671	0.000518292	0.000216574
0.000592239	0.0025994	0.000365842
0.000513134	0.000927656	0.000381103
0.000317857	0.00113142	0.000230494
0.000285964	0.000607573	0.000383904
0.000193181	0.000607244	0.000370883
0.000152847	0.000592016	0.0002834
0.0002665		0.00052195
8.63654e-05
0.000144837
6.6622e-05
5.31914e-05
0.000190513
0.000405789
9.80298e-05

## Sheet: 1c#3
Two-photon Ca2+ imaging in CA1
Cre Line:	Emx1
Indicator:	GCaMP6s
Parameter:	Network Burst time fraction
Unit:	Fraction
related to	Figure 3F
P4	P11	P18
0.147953	0.199989	0.180755
0.15817	0.229254	0.179421
0.15484	0.180018	0.207969
0.142749	0.251152	0.194694
0.153573	0.259472	0.158796
0.171278	0.282035	0.275568
0.0634071	0.264565	0.220072
0.101585	0.193816	0.116196
0.0704705	0.227017	0.197366
0.139815	0.179808	0.152726
0.125894	0.219105	0.145591
0.0861155		0.163683
0.0819931
0.112894
0.113708
0.0734617
0.106333
0.126095
0.0801055

## Sheet: 1c#4
Two-photon Ca2+ imaging in CA1
Cre Line:	Emx1
Indicator:	GCaMP6s
Parameter:	Network Burst duration
Unit:	s
related to	Figure 3G
P4	P11	P18
0.810478	0.465685	0.355472
0.823401	0.85472	0.447317
0.856525	0.555529	0.366097
0.536788	0.840481	0.366433
0.616922	0.659249	0.387955
0.740921	0.823467	0.424448
0.458971	0.527983	0.40581
0.903168	0.653689	0.311832
0.480597	0.562868	0.482094
0.623699	0.545224	0.316728
0.546169	0.455827	0.318622
0.517689		0.317529
0.520096
0.715062
0.600436
0.588458
0.869946
0.765445
0.611129

## Sheet: 1c#5
Two-photon Ca2+ imaging in CA1
Cre Line:	Emx1
Indicator:	GCaMP6s
Parameter:	Network Burst size
Unit:	Fraction
related to	Figure 3H
P4	P11	P18
0.0902719	0.0648094	0.054598
0.108591	0.114024	0.051795
0.135378	0.0626875	0.0452865
0.062538	0.0966522	0.0430863
0.0784278	0.0674813	0.0444436
0.103077	0.173465	0.0547439
0.0887405	0.0889384	0.0559729
0.117863	0.102351	0.0363985
0.0579365	0.0700523	0.0548077
0.0553063	0.0731602	0.0436502
0.0458853	0.0629478	0.0388304
0.0649745		0.0563023
0.0384321
0.0574495
0.0348599
0.0315754
0.0849706
0.0848472
0.0511787

## Sheet: 1c#6
Two-photon Ca2+ imaging in CA1
Cre Line:	Emx1
Indicator:	GCaMP6s
Parameter:	Participation rate of cells to network Bursts
Unit:	Fraction
related to	Figure 3I
P4	P11	P18
0.118925	0.128572	0.130994
0.143257	0.154603	0.105978
0.178609	0.109166	0.11304
0.101196	0.135928	0.106881
0.111341	0.107528	0.100653
0.145285	0.244311	0.115079
0.142344	0.167849	0.120759
0.145868	0.157875	0.0972576
0.102797	0.120909	0.0998168
0.0801666	0.12523	0.112784
0.0713283	0.127255	0.0974383
0.096142		0.145571
0.0647765
0.0719503
0.0473942
0.0418777
0.107108
0.109806
0.0748992

## Sheet: 1c#7
Two-photon Ca2+ imaging in CA1
Cre Line:	Emx1
Indicator:	GCaMP6s
Parameter:	Gini coefficient of Participation rate of cells to NBs
Unit:
related to	Results section
P4	P11	P18
0.246607	0.263429	0.274288
0.216818	0.174527	0.318652
0.210344	0.230721	0.461825
0.261423	0.199134	0.274054
0.257596	0.20221	0.29589
0.25336	0.233792	0.459039
0.393023	0.15787	0.252156
0.30805	0.169995	0.343228
0.368172	0.171989	0.42771
0.287122	0.283905	0.408178
0.270864	0.187154	0.387059
0.424238		0.325844
0.417786
0.366307
0.37935
0.482584
0.343211
0.414266
0.361524
