# Supplementary material for: Network instability dynamics drive a transient bursting period in the developing hippocampus in vivo
Source: eLife. 2022 Dec 19;11:e82756. doi: 10.7554/eLife.82756 (PMC9762703; doi:10.7554/eLife.82756)
Supplement: Figure 4—source data 1. [file elife-82756-fig4-data1.xlsx]

## Sheet: 1d#1
Two-photon Ca2+ imaging in CA1
Cre Line:	Emx1
Indicator:	GCaMP6s
Parameter:	Population coupling of all cells
Unit:
related to	Figure 4A
P4	P11	P18
0.000972878	0.00423578	-0.000213323
-0.00134198	0.00235406	-0.00032209
0.00146698	0.00149629	0.000544037
0.00231591	0.0016556	0.00335828
0.00181153	0.00159302	0.00186736
0.000958729	0.00578167	6.65642e-05
0.0012072	0.0034012	-0.00114652
0.000405796	0.0036847	0.00209297
0.000844279	0.00236056	-0.000531016
-0.000797717	0.00295231	0.000179115
0.000336789	0.00349307	0.00333551
0.000956776		-0.00135817
-3.28397e-05
-0.00188097
-0.00024793
-0.000301574
-0.000487093
-0.000702752
-0.000205752

## Sheet: 1d#2
Two-photon Ca2+ imaging in CA1
Cre Line:	Emx1
Indicator:	GCaMP6s
Parameter:	Fraction of cells with significant population coupling
Unit:	Fraction
related to	Figure 4B
P4	P11	P18
0.107143	0.244444	0.0933333
0.0789474	0.0977444	0.0588235
0.112782	0.112	0.0588235
0.105263	0.142857	0.191011
0.117647	0.0727273	0.112245
0.116505	0.294643	0.0952381
0.0705882	0.220472	0.117021
0.0588235	0.206186	0.139706
0.126984	0.179688	0.0662983
0.047619	0.131868	0.167665
0.0933333	0.230769	0.241135
0.0666667		0.06
0.0547945
0.0461538
0.103896
0.0106383
0.0967742
0.118644
0.0853659

## Sheet: 1d#3
Two-photon Ca2+ imaging in CA1
Cre Line:	Emx1
Indicator:	GCaMP6s
Parameter:	Population coupling of significant cells
Unit:
related to	Figure 4C
P4	P11	P18
0.0180928	0.0167168	0.022033
0.0173995	0.0243757	0.0211921
0.023078	0.016637	0.0156991
0.0301202	0.0169067	0.0206149
0.0269118	0.0228827	0.0179362
0.0195508	0.0216754	0.0228728
0.0237331	0.0149254	0.0188851
0.0280757	0.0180048	0.0168911
0.0381287	0.015344	0.0172369
0.0160264	0.0164108	0.0182423
0.012375	0.0146121	0.0213597
0.0215947		0.0183045
0.0170713
0.0120887
0.0104132
0.0112641
0.0243248
0.0368471
0.0161935

## Sheet: 1d#4
Two-photon Ca2+ imaging in CA1
Cre Line:	Emx1
Indicator:	GCaMP6s
Parameter:	Fraction of significant pairs for STTC
Unit:	Fraction
related to	Figure 4E
P4	P11	P18
0.24147	0.150993	0.0531849
0.224395	0.23946	0.110175
0.280696	0.115565	0.0616674
0.122852	0.201475	0.042334
0.22987	0.0680148	0.0485839
0.204202	0.616117	0.0432395
0.135472	0.223722	0.0345564
0.125448	0.452105	0.0326988
0.0325203	0.211983	0.087206
0.0926316	0.14811	0.0484866
0.110991	0.152398	0.0442638
0.0804598		0.028508
0.0465571
0.0735577
0.0491228
0.041842
0.216365
0.154462
0.0575949

## Sheet: 1d#5
Two-photon Ca2+ imaging in CA1
Cre Line:	Emx1
Indicator:	GCaMP6s
Parameter:	STTC of significant pairs
Unit:
related to	Figure 4G
P4	P11	P18
0.129369	0.0716016	0.0929758
0.179975	0.111509	0.104144
0.148106	0.0934553	0.0858691
0.140537	0.0896588	0.0766924
0.127753	0.121691	0.0769648
0.134442	0.102833	0.112592
0.151795	0.0629922	0.0887946
0.230819	0.082469	0.0898317
0.26046	0.0718476	0.116229
0.134318	0.0904888	0.0983568
0.0868854	0.0633199	0.107379
0.141014		0.0940123
0.192164
0.276141
0.201106
0.309023
0.157681
0.268922
0.206148

## Sheet: 1d#6
Two-photon Ca2+ imaging in CA1
Cre Line:	Emx1
Indicator:	GCaMP6s
related to	Figure 4H
P4		P11		P18
distance [µm]	STTC	distance [µm]	STTC	distance [µm]	STTC
36.4468	0.17826	171.963	0.08209	22.9836	0.13018
61.4	0.12495	96.3233	0.06286	56.3635	0.11315
49.6929	0.20791	130.95	0.06136	165.287	0.11594
19.7846	0.13593	236.072	0.06667	97.979	0.06336
69.6301	0.21307	255.253	0.0648	182.186	0.07692
39.6289	0.09986	249.123	0.04718	200.911	0.0729
94.3355	0.12448	221.891	0.06806	193.701	0.0749
56.0775	0.14524	234.374	0.06553	213.616	0.11539
58.5246	0.117	211.989	0.07153	229.01	0.08135
71.0255	0.11976	79.2772	0.04944	138.844	0.09826
97.4174	0.16366	127.748	0.1	212.695	0.10096
140.339	0.24917	151.999	0.06438	39.8207	0.11926
49.6918	0.15388	165.695	0.05678	83.2096	0.13387
58.6762	0.10613	180.834	0.09031	152.92	0.12947
51.3058	0.10613	202.406	0.04825	158.242	0.08138
147.053	0.12726	213.556	0.07916	198.407	0.07918
82.1955	0.11105	105.823	0.06268	188.265	0.08038
139.788	0.24216	93.2074	0.05772	219.174	0.09995
69.4631	0.16797	82.9468	0.11217	49.8186	0.0859
78.3198	0.28783	81.8454	0.05375	112.599	0.08948
146.069	0.15702	194.985	0.05831	20.8022	0.0696
108.831	0.10717	93.6391	0.11101	116.268	0.06596
147.192	0.11996	174.212	0.05	44.3224	0.0837
107.309	0.13509	169.057	0.05509	78.4875	0.09268
140.561	0.10825	230.602	0.06962	96.7011	0.07075
114.766	0.08499	12.3225	0.08785	159.861	0.06011
143.959	0.08874	26.734	0.08283	192.2	0.06476
131.442	0.20013	52.5684	0.05099	197.176	0.11343
139.786	0.10735	78.2047	0.05991	27.5265	0.07484
170.409	0.08744	73.5343	0.08286	89.6608	0.10361
163.41	0.08097	84.3329	0.05586	204.895	0.08918
157.094	0.14702	93.2497	0.08694	162.43	0.12219
201.199	0.08744	143.51	0.04717	144.406	0.10968
186.805	0.10735	155.293	0.05986	104.695	0.08962
192.021	0.10182	174.579	0.05287	178.961	0.11166
215.21	0.10222	168.023	0.08931	178.402	0.08323
73.1276	0.1085	168.344	0.0593	50.9503	0.10176
92.6007	0.16163	180.914	0.07294	28.0789	0.09417
133.001	0.14125	44.9643	0.06025	59.0605	0.07802
19.6614	0.15984	75.5818	0.09673	63.0893	0.12607
44.994	0.11997	135.018	0.064	115.668	0.14109
92.804	0.19774	195.875	0.04319	141.778	0.09626
216.022	0.10613	150.997	0.05938	154.769	0.08983
16.775	0.12345	191.295	0.06407	173.472	0.08321
115.5	0.25058	195.652	0.06072	214.987	0.09705
171.986	0.19102	207.768	0.05938	49.0431	0.0762
192.574	0.09986	200.321	0.07923	67.5026	0.07359
44.2477	0.18345	185.541	0.06718	107.989	0.07541
144.584	0.11976	146.897	0.04868	120.309	0.08002
122.025	0.10613	107.661	0.06324	186.836	0.06725
95.5903	0.10613	71.3061	0.06465	205.275	0.17232
130.358	0.15196	108.309	0.05863	77.2582	0.13061
114.953	0.10997	120.826	0.07361	82.3169	0.08695
177.731	0.11825	32.0968	0.06451	111.743	0.11821
211.809	0.11664	57.1903	0.05064	122.137	0.09204
89.7832	0.08523	90.5781	0.06601	158.811	0.06865
215.448	0.12744	115.235	0.05195	170.717	0.08427
76.7203	0.10717	137.453	0.06628	150.79	0.0848
124.936	0.08199	24.5569	0.05432	174.617	0.0938
214.161	0.11996	57.3565	0.05595	201.694	0.09869
162.35	0.13509	64.508	0.05281	206.776	0.07659
196.079	0.0901	41.1299	0.06118	229.254	0.09897
120.591	0.14524	97.469	0.12034	63.9764	0.07186
131.424	0.15196	76.8299	0.06086	124.314	0.06531
140.186	0.16439	66.0461	0.06645	151.877	0.07157
180.287	0.09153	64.509	0.1134	178.232	0.07286
235.936	0.11561	106.573	0.06212	118.466	0.08671
164.143	0.117	111.64	0.0659	169.945	0.08704
247.284	0.12156	123.027	0.0628	113.968	0.07249
192.373	0.10182	93.8161	0.06439	172.712	0.08109
64.2818	0.16745	114.577	0.0915	227.614	0.0881
42.3553	0.09653	124.065	0.11072	58.7481	0.07574
22.9801	0.16521	149.261	0.06628	132.851	0.09671
96.5388	0.26596	150.861	0.05812	96.9617	0.103
83.6499	0.29424	168.413	0.0606	113.711	0.11659
72.6129	0.19503	162.277	0.05018	159.604	0.07147
24.8016	0.28049	157.581	0.06405	40.5735	0.06933
100.765	0.13002	169.082	0.08534	121.547	0.07258
104.031	0.31789	200.906	0.08397	169.696	0.06516
11.8696	0.08787	21.8873	0.05188	145.144	0.07762
58.0336	0.17913	83.4334	0.05281	210.759	0.07224
108.676	0.10812	170.206	0.04952	64.0912	0.07394
28.3067	0.21015	34.9761	0.08108	129.209	0.07625
87.7013	0.27927	40.2156	0.04435	128.535	0.16671
38.5693	0.22486	57.1215	0.06523	129.038	0.09215
62.4556	0.10799	48.9594	0.0737	31.7942	0.08769
104.222	0.26784	92.7899	0.05153	25.3591	0.08076
79.5645	0.12414	51.1415	0.08409	119.714	0.08133
107.25	0.21024	99.758	0.07099	147.204	0.09011
40.0498	0.20762	59.3608	0.08595	97.5714	0.11118
58.5095	0.09653	101.946	0.07381	175.801	0.11726
40.8551	0.13002	80.6862	0.04625	163.304	0.1019
98.3764	0.1293	88.5998	0.10444	188.871	0.11537
54.9793	0.27386	163.4	0.05795	207.48	0.10258
46.7712	0.22252	113.594	0.05044	93.0101	0.08302
85.6601	0.0875	131.961	0.06834	136.771	0.10349
112.232	0.28516	158.25	0.07005	131.071	0.0727
77.9161	0.0989	148.845	0.0664	162.329	0.09177
105.762	0.28607	152.818	0.06722	68.1403	0.11085
80.0747	0.09337	164.279	0.06224	81.5709	0.10802
66.7872	0.26146	147.076	0.06555	78.1594	0.09643
80.3016	0.09653	165.981	0.04999	93.8951	0.18931
84.5962	0.07954	189.685	0.06949	105.63	0.08734
106.769	0.12175	192.224	0.06001	138.563	0.08321
93.2268	0.19001	23.1125	0.08107	175.76	0.09255
113.405	0.21198	47.3937	0.09561	80.0412	0.12811
131.742	0.09153	57.4483	0.1378	112.864	0.14581
104.99	0.11664	56.6105	0.06339	118.165	0.08867
80.9146	0.12189	72.373	0.09371	219.892	0.11922
115.906	0.30893	54.5803	0.06765	195.184	0.06541
86.536	0.1195	77.8529	0.06121	54.5505	0.07815
111.048	0.09261	106.713	0.08423	21.4202	0.09479
88.631	0.09048	146.69	0.06765	95.5264	0.12095
118.878	0.1719	124.543	0.06588	69.3439	0.05802
110.775	0.07843	133.856	0.0664	95.3781	0.09265
101.065	0.15905	145.373	0.05614	177.065	0.05992
107.972	0.15905	153.207	0.08505	87.7486	0.07089
122.677	0.13644	184.401	0.06995	67.1555	0.11785
145.177	0.08146	72.3776	0.06214	116.819	0.08332
134.888	0.3706	139.794	0.0693	126.279	0.08132
127.147	0.12443	135.315	0.05725	139.232	0.12298
125.239	0.14763	49.3697	0.05698	162.291	0.09726
125.287	0.33344	25.2532	0.06496	60.7824	0.09218
128.366	0.13448	64.3821	0.06314	82.7361	0.0746
151.922	0.15857	105.52	0.06358	114.02	0.10984
145.961	0.13647	184.714	0.06592	130.012	0.10769
141.472	0.13518	74.1574	0.07954	162.759	0.07938
141.428	0.12175	39.7926	0.07084	153.451	0.07115
150.681	0.08602	52.5574	0.0499	191.24	0.11845
153.45	0.28138	143.667	0.06702	164.9	0.14066
158.938	0.09192	67.0363	0.05782	111.987	0.09587
179.987	0.16703	79.2041	0.05596	68.3348	0.06359
194.403	0.08984	94.2416	0.06497	20.9374	0.08075
194.276	0.08566	99.3971	0.0522	87.8811	0.10936
206.035	0.09653	99.2398	0.05473	121.778	0.06648
204.637	0.11322	103.72	0.06442	104.809	0.08439
81.8378	0.13543	118.635	0.06134	93.5986	0.10713
20.3325	0.21893	130.476	0.0532	151.269	0.08174
164.806	0.11131	138.482	0.09538	158.194	0.06611
40.2208	0.25473	220.87	0.06948	42.418	0.09643
120.837	0.16896	180.132	0.06118	113.77	0.09745
32.8078	0.31303	63.2668	0.06066	71.7522	0.11695
139.767	0.13193	64.4667	0.0485	162.654	0.14735
62.7388	0.18291	81.1502	0.07959	57.0667	0.07696
42.1258	0.11297	65.4531	0.05701	198.414	0.0931
98.081	0.11474	130.301	0.05693	204.166	0.06881
129.299	0.12791	67.5049	0.06258	121.947	0.08147
86.6379	0.1823	108.986	0.12714	184.231	0.06663
167.071	0.13439	109.258	0.09135	141.858	0.06882
119.626	0.16366	114.117	0.0705	100.631	0.11152
158.627	0.1427	114.863	0.05822	132.566	0.08231
104.301	0.141	127.551	0.10757	65.1244	0.09489
122.981	0.15871	126.226	0.10286	46.9517	0.07846
132.369	0.21748	135.744	0.06013	55.7803	0.10682
142.902	0.11988	138.994	0.05563	141.7	0.08042
183.222	0.15317	150.501	0.09571	21.6576	0.12508
150.57	0.16745	141.012	0.08318	147.142	0.09877
19.4732	0.12288	165.124	0.06873	64.5443	0.08366
59.9022	0.1848	159.905	0.06738	93.1851	0.08582
54.1838	0.15131	174.345	0.05442	113.938	0.10746
81.2874	0.08481	181.278	0.05457	137.643	0.09402
30.7877	0.14526	79.1849	0.09915	36.4492	0.08962
142.896	0.13871	43.2892	0.07637	135.468	0.08351
42.9165	0.16662	37.7243	0.07343	113.994	0.11558
99.1092	0.18576	64.2965	0.05406	94.8528	0.0664
119.955	0.16662	123.816	0.04659	133.678	0.06999
68.0097	0.11887	54.7573	0.06387	166.404	0.07962
39.9665	0.10869	122.558	0.04866	118.937	0.08206
73.4827	0.16491	45.6271	0.05534	171.861	0.07504
33.0535	0.18576	75.786	0.10671	178.488	0.1007
44.5702	0.17661	124.777	0.07346	65.3219	0.09596
65.8239	0.14342	188.609	0.05517	96.4816	0.06886
65.7503	0.1418	199.78	0.05915	131.177	0.07994
72.0257	0.09456	75.3943	0.07206	138.738	0.10938
88.917	0.13058	206.05	0.0696	203.364	0.07774
104.732	0.09271	151.79	0.08635	130.437	0.09489
124.401	0.13058	123.99	0.06474	136.471	0.09685
114.063	0.09653	102.767	0.05142	189.324	0.07228
137.155	0.08481	120.749	0.06319	30.5813	0.13169
106.709	0.11154	176.942	0.0908	72.7087	0.08311
110.514	0.13312	174.01	0.07021	108.573	0.13444
146.418	0.10576	215.943	0.05063	137.898	0.07982
122.955	0.08773	196.806	0.07458	135.802	0.07408
135.086	0.11986	62.2191	0.07316	153.018	0.1045
134.224	0.09874	131.935	0.08106	158.548	0.08332
177.215	0.17131	176.824	0.07783	50.2651	0.0653
168.294	0.08214	46.7071	0.08691	87.5559	0.09666
197.856	0.17976	46.1683	0.06194	96.6653	0.07655
210.633	0.14512	38.3326	0.07833	117.244	0.0726
217.111	0.09553	62.9575	0.06747	113.485	0.08292
54.1589	0.10461	32.4174	0.07028	118.767	0.08784
135.105	0.15665	57.6743	0.06678	149.957	0.09901
51.0827	0.13937	112.009	0.06794	111.225	0.08796
63.9301	0.1061	65.1791	0.04611	91.2262	0.08851
86.6945	0.1453	66.0731	0.07864	137.709	0.0772
102.638	0.1234	114.595	0.05182	205.652	0.09585
122.211	0.13127	77.529	0.06535	39.5359	0.08986
225.843	0.10535	92.5305	0.09803	112.407	0.09898
40.4495	0.09881	87.4301	0.05616	95.142	0.06616
73.612	0.07052	127.204	0.06571	82.6133	0.07696
61.8158	0.0936	142.602	0.06264	119.171	0.08633
6.58917	0.51076	121.308	0.06341	116.093	0.12761
106.734	0.11421	130.691	0.08135	109.794	0.08115
123.424	0.25854	129.924	0.05262	81.191	0.08783
81.0506	0.18043	133.374	0.10414	112.533	0.12456
24.1794	0.08311	148.755	0.05194	50.1049	0.10582
100.756	0.1869	20.7986	0.07849	64.3289	0.14788
86.067	0.18484	111.927	0.05902	126.96	0.07409
55.4822	0.16919	103.73	0.07808	158.213	0.10081
125.487	0.09884	136.719	0.0618	114.937	0.11372
85.1549	0.15883	151.247	0.06108	79.983	0.0993
44.3636	0.11905	104.388	0.06358	133.364	0.08291
43.5068	0.11905	22.8453	0.10041	156.194	0.09817
52.6499	0.19442	45.1316	0.07432	39.8229	0.0868
99.9258	0.11182	50.2349	0.07653	64.4893	0.0802
106.624	0.08566	88.8195	0.08809	156.802	0.14535
58.4522	0.09881	66.504	0.10605	57.6232	0.13547
93.375	0.1334	87.6769	0.05461	133.86	0.08463
124.269	0.13714	93.7793	0.06308	144.039	0.08939
65.6647	0.0929	132.875	0.06604	106.079	0.08626
98.7086	0.09584	146.503	0.09647	46.3672	0.08578
89.1334	0.17397	122.848	0.08407	52.249	0.07879
78.4356	0.10901	105.345	0.05694	95.9328	0.1025
112.191	0.14967	171.017	0.06666	74.7448	0.10515
120.328	0.16462	98.8526	0.09408	117.768	0.08492
81.2883	0.13494	172.862	0.07536	83.4329	0.08817
131.634	0.20579	66.2708	0.07199	16.7978	0.07434
125.137	0.13217	131.239	0.10998	104.016	0.06695
87.6701	0.12835	102.83	0.06004	104.413	0.07821
131.896	0.0936	89.9467	0.08489	111.224	0.09888
104.865	0.13866	165.693	0.06609	41.7253	0.17696
111.537	0.1918	139.519	0.08119	89.3463	0.15005
124.107	0.16301	194.778	0.06593	56.053	0.07328
107.894	0.1291	132.173	0.05151	37.9642	0.10039
130.965	0.13014	26.8718	0.05879	57.1793	0.06637
143.439	0.15686	88.1314	0.08041	52.2098	0.06464
125.439	0.14609	104.865	0.11585	63.7925	0.11078
122.352	0.10067	86.0365	0.05052	92.6305	0.12972
127.578	0.21367	71.9679	0.06367	125.763	0.10207
141.631	0.08311	48.7719	0.0565	160.486	0.07833
128.448	0.16046	87.093	0.06453	31.9387	0.06978
163.612	0.08221	97.0473	0.06948	56.1879	0.07537
137.176	0.08897	92.2294	0.07389	38.4661	0.11692
155.826	0.11182	99.4715	0.08438	161.642	0.096
139.796	0.13419	114.51	0.06305	65.4145	0.06743
144.113	0.08071	78.8486	0.0622	25.5587	0.07582
164.334	0.1053	80.1463	0.07584	58.194	0.08189
160.613	0.08838	157.812	0.06066	133.617	0.07229
187.401	0.31425	133.045	0.05375	52.5522	0.07497
185.96	0.08566	150.975	0.09913	121.444	0.09449
190.534	0.13817	129.358	0.08898	39.5151	0.08219
209.475	0.09438	50.8349	0.05384	30.634	0.0933
101.013	0.11802	93.6748	0.05542	15.0386	0.08186
41.3961	0.10188	161.134	0.05534	74.0241	0.15128
40.8972	0.36874	170.025	0.07145	57.1287	0.10105
125.417	0.13424	147.066	0.08088	45.2948	0.12233
26.4266	0.164	62.0134	0.09278	46.8588	0.07546
93.0612	0.11027	59.391	0.05577	86.5746	0.08473
87.2022	0.21318	44.0331	0.07091	27.5514	0.06066
47.5332	0.16984	126.749	0.09727	72.5063	0.08588
46.3863	0.11252	90.0147	0.06392	15.1247	0.08297
55.1752	0.12877	83.3912	0.07199	122.7	0.07284
96.4886	0.10016	73.964	0.07421	92.3498	0.10826
66.1339	0.16347	116.673	0.06904	251.76	0.07096
89.9732	0.13597	114.228	0.07785	88.1874	0.08726
73.8038	0.11904	144.88	0.04364	34.49	0.1119
119.623	0.14563	153.174	0.10521	51.1378	0.07653
120.034	0.09292	148.557	0.06964	67.3563	0.09812
127.033	0.1221	74.259	0.06337	64.8844	0.16704
134.575	0.15328	16.9359	0.07541	63.8252	0.11682
183.627	0.13851	60.6106	0.06013	116.691	0.07933
201.857	0.13597	103.24	0.05736	73.569	0.08055
236.8	0.11802	74.2824	0.09707	76.7766	0.06645
14.3145	0.17742	29.5126	0.06569	119.969	0.20228
25.3359	0.1429	65.8443	0.08056	119.358	0.23311
73.4692	0.14578	29.5665	0.05671	108.462	0.08986
196.914	0.08243	93.6057	0.08126	103.103	0.07169
9.60865	0.13763	51.5462	0.09768	126.59	0.08688
96.1335	0.16819	38.4953	0.06618	101.578	0.08344
156.692	0.18151	78.684	0.10814	168.838	0.10035
59.8467	0.08481	50.0877	0.07166	146.6	0.06554
108.367	0.12863	143.631	0.08613	157.284	0.06653
28.203	0.1649	51.2644	0.08295	167.653	0.07172
35.6224	0.08486	62.4316	0.09084	169.404	0.11475
124.972	0.18905	129.505	0.06841	199.761	0.14601
70.9121	0.22735	114.803	0.09506	198.166	0.0866
152.823	0.16984	85.2159	0.0988	209.964	0.09016
197.355	0.18286	124.606	0.06879	15.7525	0.101
170.781	0.15431	80.6454	0.07517	73.28	0.11503
32.8927	0.1312	103.904	0.05893	18.2665	0.06285
90.0635	0.15317	123.295	0.0723	83.5354	0.18202
102.439	0.08243	95.9462	0.05926	44.0911	0.06166
76.5907	0.14749	117.494	0.11273	37.055	0.07216
110.818	0.19385	115.294	0.07311	105.906	0.16375
50.7586	0.1719	134.856	0.05503	68.8413	0.11115
200.76	0.1036	118.973	0.06346	78.9292	0.20925
158.119	0.08033	142.016	0.05246	130.683	0.07644
73.1705	0.07478	90.5962	0.08411	84.4021	0.14728
109.342	0.27229	34.1041	0.05726	110.03	0.10638
161.04	0.09606	70.4599	0.06946	116.878	0.06112
76.7861	0.1068	136.35	0.07418	95.6792	0.06874
195.854	0.17972	97.2851	0.07801	98.3363	0.07701
183.245	0.07432	75.5105	0.08823	149.041	0.1535
121.772	0.19894	84.3867	0.06598	105.609	0.24231
194.675	0.13304	95.56	0.08853	116.971	0.22286
123.503	0.12335	114.62	0.07486	130.221	0.07546
165.323	0.1068	124.612	0.08108	124.464	0.14122
190.022	0.15004	129.648	0.08952	124.751	0.08728
98.5907	0.1406	20.892	0.06432	129.02	0.12065
177.272	0.12212	148.466	0.06566	136.453	0.15101
108.595	0.19859	91.7907	0.06883	140.469	0.07061
117.278	0.08772	85.3726	0.06593	151.863	0.1395
134.506	0.1406	45.3387	0.0809	157.29	0.07324
186.487	0.08736	65.7032	0.05818	174.058	0.08036
113.866	0.08864	150.684	0.07114	159.439	0.08039
127.833	0.24181	76.1787	0.06746	173.202	0.07056
163.308	0.12435	168.099	0.05989	160.499	0.13188
158.555	0.16869	92.5757	0.05763	165.155	0.16618
217.275	0.11076	140.06	0.092	196.842	0.11443
206.045	0.09083	121.169	0.08416	189.12	0.07617
185.659	0.11804	67.04	0.05109	229.734	0.13562
152.105	0.08626	34.5347	0.06326	57.5323	0.21863
192.241	0.11421	49.2342	0.07221	77.0821	0.0982
230.033	0.11798	29.1086	0.04616	30.2736	0.13288
243.688	0.18949	61.9858	0.12518	68.0695	0.11579
226.016	0.11796	62.6124	0.06057	55.5988	0.07779
216.031	0.08481	52.1356	0.05959	83.2828	0.09002
44.9207	0.09249	141.736	0.09711	53.5749	0.09158
26.2544	0.10323	72.8841	0.05015	96.0141	0.11088
66.0776	0.09154	101.368	0.06907	129.301	0.07824
55.8279	0.08736	130.671	0.05556	111.214	0.12129
54.0624	0.08033	113.163	0.05418	128.695	0.08386
106.148	0.07478	119.822	0.04861	123.392	0.08988
148.995	0.07811	107.772	0.07489	131.459	0.08012
149.96	0.12669	121.339	0.10571	158.516	0.10993
149.051	0.10214	85.1348	0.07072	153.78	0.06898
59.9881	0.24507	82.5167	0.08994	152.578	0.07771
82.5349	0.18988	90.7898	0.07392	179.993	0.10041
139.006	0.30964	108.185	0.06488	180.689	0.14947
94.275	0.1723	105.097	0.08937	204.456	0.11533
19.4697	0.26147	21.408	0.09842	221.226	0.12409
23.2081	0.12259	77.889	0.05658	85.4855	0.28101
110.915	0.14411	122.989	0.06659	137.584	0.12427
138.802	0.21595	94.8695	0.05916	33.2264	0.1362
183.429	0.23765	103.618	0.06447	99.3009	0.07928
156.758	0.17577	98.798	0.05213	83.301	0.11764
32.5692	0.11952	115.413	0.08214	192.572	0.07518
75.75	0.19027	109.353	0.04684	172.163	0.09844
96.5058	0.17097	108.977	0.05018	118.215	0.23303
186.55	0.10849	126.793	0.09816	171.478	0.11785
177.891	0.14375	84.4087	0.06256	111.962	0.15477
95.4699	0.26711	83.8878	0.07266	136.403	0.27215
181.542	0.10839	76.8911	0.07954	155.654	0.11194
108.219	0.13964	165.269	0.06566	172.614	0.09453
180.371	0.15968	89.2617	0.08323	193.215	0.31151
91.467	0.19241	99.5659	0.06593	173.067	0.08863
118.836	0.18114	132.035	0.09205	156.083	0.07527
146.355	0.13342	116.769	0.05777	214.197	0.11721
203.368	0.16814	82.512	0.06353	235.126	0.07978
152.24	0.11764	163.507	0.06193	172.951	0.20113
151.532	0.12194	76.7854	0.05521	228.017	0.19892
217.026	0.12727	179.797	0.07262	241.648	0.18843
228.891	0.14826	146.823	0.05521	237.533	0.11021
215.419	0.11189	173.96	0.09009	60.9807	0.1473
48.7593	0.13754	18.8535	0.06587	162.696	0.1338
71.2674	0.19074	50.7012	0.06972	102.2	0.11127
131.975	0.11438	88.3614	0.06751	84.0927	0.09023
34.7325	0.14526	103.682	0.06575	113.544	0.12949
148.041	0.10181	90.9111	0.07886	99.35	0.07903
83.0534	0.26392	119.906	0.05639	106.099	0.0844
18.992	0.07987	91.6348	0.06145	202.068	0.09308
99.6772	0.07576	27.8667	0.07691	137.303	0.06853
127.552	0.12807	154.06	0.10487	30.791	0.07764
172.157	0.19424	85.1011	0.06538	34.9008	0.05454
145.51	0.10854	125.525	0.05163	74.4326	0.04705
39.154	0.1	114.651	0.06369	195.325	0.06313
65.0627	0.10174	121.744	0.06314	25.8102	0.12461
39.8325	0.11306	102.159	0.08369	113.044	0.06529
53.097	0.14144	118.165	0.09307	94.218	0.13617
85.8262	0.08272	59.8705	0.09143	124.018	0.07185
61.0271	0.13455	19.3938	0.08377	146.901	0.06704
144.622	0.06736	69.5805	0.08082	86.43	0.07651
100.259	0.11639	68.4438	0.0794	77.473	0.06894
55.3219	0.12685	29.4317	0.08555	74.2792	0.06642
61.1068	0.07361	76.8931	0.09094	123.229	0.06799
158.284	0.09204	109.25	0.05218	134.458	0.06524
86.4652	0.10283	91.8988	0.05779	110.953	0.11228
99.3821	0.10181	71.3492	0.08946	196.555	0.10675
169.734	0.12807	85.0556	0.06324	162.907	0.09348
143.867	0.08752	69.1448	0.05378	148.612	0.08258
160.943	0.09581	88.0012	0.07508	167.259	0.07911
141.389	0.10181	83.7567	0.05633	219.169	0.18527
165.667	0.16977	117.955	0.05419	201.94	0.10298
125.311	0.13455	58.169	0.04924	78.1018	0.08091
97.4898	0.12581	39.2474	0.08172	40.8237	0.0672
102.322	0.08272	196.199	0.0694	88.8906	0.0614
162.852	0.11639	33.5411	0.09949	72.8834	0.08556
107.99	0.08255	42.776	0.05608	104.244	0.08592
115.523	0.12063	139.352	0.06536	173.654	0.09825
127.756	0.15122	125.142	0.05459	122.407	0.07382
142.835	0.11829	107.285	0.06551	147.85	0.06805
139.303	0.15708	164.409	0.08874	190.229	0.0856
164.626	0.08195	61.1788	0.06658	179.132	0.07202
222.225	0.08344	150.918	0.08361	190.166	0.0941
233.756	0.09969	72.4227	0.0801	196.673	0.08964
123.558	0.20923	128.515	0.05515	88.3778	0.10286
80.3619	0.1856	128.662	0.11259	53.3473	0.06259
22.6995	0.22026	88.7964	0.06854	29.5144	0.06386
83.2568	0.2875	156.833	0.12028	43.0768	0.07559
79.1879	0.20787	127.749	0.1204	46.303	0.12923
99.817	0.11351	136.889	0.0489	41.8422	0.11254
84.0548	0.08386	20.8138	0.06364	94.9767	0.06951
62.919	0.15481	84.7492	0.067	86.1562	0.06463
52.9774	0.14412	72.5675	0.0748	77.5556	0.09989
25.512	0.15192	88.1858	0.15669	108.725	0.07409
124.294	0.19847	69.3848	0.06726	122.833	0.08403
98.1618	0.0967	82.8648	0.0723	91.4717	0.07131
82.4536	0.14514	143.312	0.07545	120.715	0.06708
30.7036	0.09865	112.87	0.09048	99.9471	0.07813
37.0181	0.23787	110.415	0.05539	99.6975	0.07039
47.4515	0.22503	56.579	0.05941	142.435	0.07361
97.3707	0.09397	57.9345	0.05836	158.96	0.09268
129.404	0.26356	86.0521	0.06235	154.943	0.07817
89.8585	0.19295	77.6807	0.07243	167.416	0.10937
121.651	0.19223	66.3902	0.05331	93.6587	0.08575
59.6604	0.11595	83.8148	0.06253	104.938	0.09727
59.8551	0.14074	111.814	0.05682	223.893	0.08382
94.7607	0.10035	79.336	0.07243	63.6563	0.0636
83.9881	0.09972	67.2	0.07781	82.6569	0.06899
72.5505	0.14015	114.886	0.08788	48.2068	0.06572
127.286	0.08386	104.396	0.05567	39.6979	0.09811
107.81	0.09663	106.088	0.05224	46.8654	0.06357
116.612	0.17273	47.5974	0.08305	160.29	0.10696
75.0246	0.14015	80.0366	0.05344	71.4747	0.07426
127.992	0.21166	63.6429	0.09949	149.979	0.10687
106.452	0.06953	93.0557	0.04913	99.6595	0.08356
121.041	0.09815	64.7823	0.05893	87.541	0.08468
81.2744	0.11508	101.32	0.07818	98.5111	0.06014
106.222	0.14015	72.7472	0.09336	113.327	0.06339
127.494	0.12194	62.5922	0.05845	196.276	0.10117
98.8846	0.08946	74.6353	0.07929	114.713	0.08103
105.649	0.17112	75.3833	0.10617	146.856	0.16941
119.08	0.07432	32.4738	0.07895	136.156	0.09917
101.377	0.09019	107.079	0.05875	141.736	0.07438
99.3695	0.08946	88.597	0.05998	220.274	0.0789
118.984	0.251	61.167	0.05682	102.251	0.10726
115.806	0.10518	48.2067	0.07578	92.9241	0.11438
121.373	0.1974	77.4735	0.0687	41.2205	0.08413
122.054	0.20244	72.0502	0.0611	25.9324	0.07612
158.807	0.13038	59.9283	0.06993	33.5807	0.06682
150.658	0.14016	80.9464	0.0917	53.0651	0.22211
139.429	0.09817	152.37	0.07477	89.2963	0.13792
133.29	0.12028	75.4229	0.09858	122.791	0.09142
141.931	0.14905	68.2381	0.08753	33.3519	0.08126
160.364	0.09019	179.813	0.06698	109.538	0.08644
181.752	0.23282	159.711	0.09612	51.0392	0.08323
179.475	0.11664	55.7966	0.07461	82.3043	0.1245
183.951	0.08851	85.7806	0.06034	102.157	0.13577
203.296	0.09817	126.469	0.0804	109.182	0.06859
198.035	0.10893	156.246	0.06002	133.181	0.11221
16.7074	0.1132	130.641	0.06669	112.361	0.16623
60.9727	0.12175	106.319	0.07361	113.586	0.11415
186.661	0.10395	45.0761	0.06851	119.444	0.08352
43.1781	0.11587	28.5109	0.07079	134.148	0.07327
206.238	0.13849	117.006	0.05977	154.123	0.08167
49.0462	0.10224	109.957	0.06241	166.058	0.08562
58.6469	0.0782	93.1953	0.08531	177.475	0.12012
121.49	0.08876	105.381	0.06349	175.085	0.07643
120.505	0.07895	127.742	0.05285	184.378	0.16659
175.141	0.14969	96.571	0.06966	196.388	0.09678
69.2936	0.11943	67.936	0.09532	195.037	0.14536
102.683	0.08599	161.742	0.0875	62.1221	0.08255
121.583	0.14504	153.21	0.08502	55.6647	0.14045
145.225	0.08663	187.39	0.06205	92.8778	0.07178
127.34	0.10678	78.3909	0.054	48.9586	0.05583
161.052	0.07686	100.2	0.04902	202.492	0.08295
134.945	0.12382	115.959	0.12176	121.302	0.10716
138.261	0.09599	117.255	0.085	141.67	0.1376
181.476	0.21214	98.2459	0.0737	110.552	0.08653
218.537	0.13617	37.5095	0.05987	93.6957	0.06368
29.4699	0.09219	71.6491	0.0748	92.4246	0.09861
206.333	0.1968	99.6603	0.0874	165.023	0.07658
76.912	0.18582	122.002	0.05225	127.636	0.10716
25.1209	0.17204	132.95	0.08778	175.527	0.08108
39.1392	0.12844	33.045	0.06753	179.677	0.09259
203.172	0.13149	83.2285	0.10976	169.019	0.07902
106.324	0.13561	68.7066	0.05962	189.028	0.06423
137.046	0.13561	71.3928	0.0617	39.7205	0.06833
101.796	0.20203	47.3101	0.07908	63.633	0.10448
52.1542	0.11154	101.709	0.06607	178.653	0.08032
46.9749	0.11961	55.283	0.08383	153.132	0.07234
68.9701	0.13173	18.7819	0.05705	142.866	0.14422
160.66	0.1003	148.263	0.05485	94.6821	0.10662
155.681	0.10084	73.8929	0.08215	32.9695	0.14439
75.9803	0.14971	95.2448	0.07069	38.3068	0.18944
190.798	0.18739	114.416	0.04513	120.878	0.21442
172.184	0.12748	43.8387	0.06942	197.564	0.13754
110.459	0.07976	92.3896	0.10473	95.4334	0.15608
219.023	0.09714	85.3196	0.07593	97.2946	0.12229
73.8911	0.12355	53.7243	0.06929	120.246	0.20083
125.441	0.09219	61.4455	0.05204	148.222	0.11048
75.8154	0.1123	34.545	0.06108	166.986	0.15535
107.623	0.15988	43.3841	0.06021	179.515	0.1003
83.5063	0.09822	63.3456	0.10603	163.401	0.11933
133.317	0.12476	52.1807	0.09036	170.31	0.14092
100.125	0.09219	70.3986	0.08365	157.303	0.11471
174.342	0.11057	76.8467	0.06798	48.2273	0.08261
124.599	0.13002	21.7162	0.07157	152.942	0.10228
105.295	0.14749	47.2758	0.06649	40.6983	0.07437
148.651	0.13002	108.211	0.07996	123.713	0.12342
107.889	0.10339	128.682	0.05783	76.222	0.09004
215.421	0.16829	48.626	0.08005	129.242	0.10419
129.156	0.14538	90.8854	0.05462	112.656	0.05278
191.935	0.08535	44.58	0.07921	146.868	0.06812
144.842	0.08385	50.5506	0.08522	123.352	0.07303
155.142	0.16874	139.315	0.06965	126.855	0.10828
170.939	0.09935	17.506	0.05031	160.719	0.06943
246.972	0.09415	54.4974	0.09434	186.917	0.07441
192.182	0.23938	137.758	0.10232	58.0768	0.06849
171.707	0.13273	95.0382	0.05004	93.5365	0.06999
263.12	0.09219	64.7739	0.05236	89.1899	0.06465
222.134	0.14687	84.9913	0.0982	114.17	0.13507
102.86	0.10952	100.307	0.06289	14.4406	0.10178
159.289	0.13113	38.7723	0.06327	81.6092	0.0636
17.5558	0.11064	49.8948	0.05881	36.51	0.12094
114.155	0.23157	185.844	0.07593	67.8928	0.11732
27.4915	0.3113	183.886	0.09396	76.2103	0.09593
37.2351	0.09242	97.9737	0.05368	89.8629	0.06691
130.832	0.13555	37.0215	0.1091	96.4458	0.06741
75.1927	0.20062	90.4084	0.103	87.6949	0.07373
158.75	0.1763	87.7677	0.0649	128.395	0.07254
203.475	0.14515	113.197	0.07241	119.793	0.10727
94.5277	0.20502	97.9943	0.11167	191.177	0.06707
107.004	0.11579	120.193	0.07114	163.302	0.1029
79.5919	0.15826	17.1274	0.06498	172.06	0.11638
115.152	0.20424	104.131	0.06401	122.709	0.14726
174.854	0.11587	27.7696	0.05477	178.152	0.09844
206.051	0.23489	74.7246	0.05065	148.772	0.06962
128.966	0.12071	70.6079	0.08703	175.562	0.11785
197.184	0.18897	34.8131	0.07263	211.294	0.06876
73.0087	0.09798	59.6984	0.07912	206.568	0.07205
111.78	0.26362	67.4434	0.10062	189.177	0.08466
200.329	0.24131	14.6876	0.05389	50.112	0.07297
64.7352	0.11987	59.3382	0.10428	91.6965	0.05795
187.324	0.11781	65.156	0.08913	45.8946	0.05695
198.7	0.12961	95.1822	0.05732	52.5139	0.05524
146.082	0.14776	63.967	0.08379	61.9758	0.10018
124.541	0.11883	24.7356	0.06937	30.3933	0.11426
193.211	0.28951	26.753	0.06073	18.3939	0.14869
94.0232	0.11148	82.3684	0.07107	118.225	0.06982
179.784	0.09978	39.1201	0.10517	47.4806	0.07602
104.913	0.15188	17.6061	0.05901	105.273	0.12879
115.047	0.16767	58.4361	0.07209	66.7858	0.10987
195.903	0.14776	69.1121	0.07976	80.576	0.13243
124.407	0.21883	45.5393	0.05005	98.1442	0.06078
144.453	0.10427	36.5706	0.06625	131.146	0.07609
163.513	0.17774	28.4196	0.09732	135.372	0.072
158.083	0.12319	48.0813	0.08344	123.664	0.13627
219.531	0.16423	27.5248	0.05991	128.927	0.08103
207.841	0.13424	28.2287	0.06665	200.694	0.10222
196.953	0.15386	134.808	0.08753	58.7565	0.0784
151.868	0.10146	66.2918	0.05025	113.178	0.06764
168.658	0.10952	66.0293	0.0725	122.247	0.06968
230.517	0.17141	28.1586	0.06199	135.067	0.07634
177.952	0.11148	56.6788	0.10232	48.6039	0.0793
41.5037	0.09456	48.0041	0.09027	115.206	0.07222
77.1256	0.11935	51.06	0.06666	126.803	0.07538
17.9573	0.13554	46.8706	0.08466	152.056	0.06562
83.9352	0.09883	102.312	0.0565	109.934	0.06036
57.9726	0.14556	6.70124	0.12766	39.4477	0.102
101.661	0.23537	73.384	0.06208	146.97	0.06391
28.814	0.10224	64.0865	0.05542	67.0299	0.06923
28.9946	0.09219	50.065	0.08498	137.005	0.07017
45.3667	0.12748	25.3951	0.04421	65.445	0.06137
123.653	0.08787	52.5316	0.05574	128.201	0.07553
100.165	0.10691	36.4731	0.07202	158.892	0.06739
54.9331	0.2572	27.1167	0.0646	115.656	0.16364
70.2581	0.09456	110.227	0.12749	102.26	0.11768
98.7919	0.09119	83.4067	0.08269	96.5752	0.06923
84.0266	0.15282	64.2002	0.13328	103.18	0.09564
106.705	0.07971	27.2299	0.13078	140.981	0.11209
69.0509	0.15282	17.5495	0.07456	122.246	0.09557
108.335	0.18513	33.5473	0.09326	133.792	0.07539
75.3822	0.21584	48.0729	0.10947	161.057	0.11652
102.559	0.11728	119.781	0.12335	170.841	0.09953
91.0482	0.11935	75.3772	0.08081	17.8119	0.07538
109.9	0.1068	131.545	0.13521	104.209	0.07738
116.239	0.25827	91.5627	0.12102	34.6041	0.06275
113.941	0.13554	77.4394	0.12928	33.4709	0.15521
105.328	0.15891	128.336	0.11204	100.228	0.09379
112.733	0.1339	72.3603	0.12045	39.1531	0.0794
123.614	0.08406	83.8217	0.08269	42.9936	0.08115
123.795	0.11054	91.8521	0.13384	101.964	0.06785
113.395	0.08065	119.31	0.1302	104.992	0.08592
116.528	0.13015	139.835	0.18366	119.064	0.12058
142.465	0.15486	125.611	0.10077	69.5264	0.17561
128.958	0.09456	171.673	0.14012	86.0266	0.06438
170.136	0.08787	199.072	0.12786	82.4287	0.07182
164.21	0.09883	164.515	0.08465	148.459	0.0752
169.238	0.13335	160.467	0.091	93.8024	0.06939
182.467	0.10745	175.869	0.11695	100.34	0.06913
94.3825	0.18611	196.838	0.10927	116.002	0.06419
162.918	0.17121	173.03	0.09564	139.013	0.07337
107.65	0.13018	177.277	0.09799	126.202	0.07002
64.7005	0.17647	188.615	0.07386	123.656	0.24937
62.4637	0.11622	222.743	0.12777	124.912	0.07829
67.4552	0.16023	218.001	0.09569	125.856	0.16356
81.8232	0.19116	209.843	0.11695	149.051	0.07912
118.921	0.23685	237.935	0.0981	134.915	0.09086
96.2278	0.12081	225.539	0.10035	146.895	0.08352
47.3133	0.19748	103.448	0.11229	160.743	0.11341
139.108	0.16132	141.05	0.10221	165.922	0.1123
46.3059	0.20248	36.3257	0.09579	196.325	0.1449
24.3817	0.13976	181.385	0.1146	12.2115	0.22674
157.805	0.15718	149.613	0.0902	95.8698	0.13031
71.9951	0.1986	279.053	0.09011	157.107	0.09475
61.6442	0.1834	126.03	0.10609	78.7609	0.13937
91.9517	0.1834	54.3141	0.0816	109.018	0.14571
58.1315	0.22096	46.7551	0.09807	125.192	0.21054
57.2948	0.13374	33.2668	0.12881	193.562	0.07816
56.0253	0.12258	118.791	0.0801	215.896	0.23258
41.6411	0.19323	99.2863	0.09312	12.5514	0.0962
53.5131	0.16896	158.676	0.1368	167.334	0.11074
80.0276	0.19396	60.8332	0.09842	46.8754	0.09735
111.733	0.12081	87.0366	0.12866	54.3343	0.08354
64.5831	0.14615	98.0862	0.09756	52.047	0.07281
62.3912	0.15192	88.2586	0.10998	97.3294	0.0879
86.596	0.17718	63.6243	0.12022	71.465	0.1238
70.7164	0.12873	138.242	0.08423	75.2014	0.07225
92.5991	0.24223	73.5069	0.07911	79.5691	0.13349
152.923	0.10991	73.5671	0.10384	116.161	0.08185
116.049	0.16892	89.7756	0.1486	134.248	0.08902
114.596	0.16023	147.605	0.10958	133.827	0.09074
114.027	0.16487	85.9071	0.09414	137.544	0.09484
139.882	0.15531	164.614	0.1601	188.077	0.11757
186.395	0.12081	145.307	0.15111	49.3039	0.11238
194.128	0.14962	116.448	0.09673	74.5079	0.16399
64.8997	0.09098	115.014	0.07108	58.1822	0.12463
12.0205	0.12081	124.225	0.09649	167.207	0.1864
139.175	0.09264	120.907	0.128	101.629	0.18755
65.627	0.10576	179.325	0.14886	165.626	0.13127
34.3135	0.13597	139.11	0.13113	86.9993	0.12509
86.5323	0.12819	182.321	0.09145	125.889	0.09
109.524	0.09438	166.381	0.11974	140.777	0.07176
126.32	0.10133	192.241	0.11051	157.241	0.09456
107.469	0.09456	214.83	0.12017	194.983	0.1709
93.8675	0.16974	216.968	0.07796	103.495	0.08676
83.9835	0.13312	260.866	0.09597	36.9405	0.11077
190.967	0.10576	244.13	0.16027	151.699	0.07545
207.737	0.10321	77.7673	0.07923	77.5266	0.09322
180.524	0.10499	88.0598	0.07605	70.9466	0.09617
49.5471	0.09728	102.552	0.12495	101.359	0.06807
176.73	0.12146	42.8078	0.07912	119.795	0.10445
120.313	0.20271	77.5853	0.08917	176.191	0.07831
78.148	0.12748	58.505	0.13021	153.497	0.08896
109.174	0.12748	106.192	0.09672	220.821	0.07965
73.0034	0.12958	118.187	0.09173	178.321	0.08363
90.4191	0.10024	90.2028	0.1452	46.8281	0.0682
106.407	0.09651	59.6188	0.10304	83.417	0.07385
52.5268	0.11351	67.3714	0.1132	186.106	0.07439
96.0239	0.11935	118.281	0.10097	218.914	0.08706
79.0132	0.08406	87.7628	0.12522	115.108	0.09131
66.3065	0.08311	144.427	0.09344	205.075	0.08281
62.2747	0.09007	110.73	0.12058	123.997	0.08366
74.0244	0.15282	113.067	0.10867	152.682	0.1287
96.4184	0.08787	130.657	0.08118	119.004	0.07584
169.502	0.12189	131.095	0.10751	76.2289	0.074
119.683	0.08787	149.058	0.11725	97.7379	0.07232
162.587	0.07907	143.899	0.12538	141.531	0.10945
134.711	0.14451	158.07	0.09344	173.57	0.11959
193.956	0.08591	167.838	0.11725	123.799	0.09152
127.506	0.10745	168.206	0.09888	134.334	0.08525
105.976	0.13335	168.108	0.0804	165.905	0.09473
144	0.16333	188.882	0.09102	139.684	0.06173
22.1414	0.07987	196.108	0.10103	154.889	0.06631
131.113	0.08098	191.496	0.09461	184.572	0.09508
203.749	0.09356	223.291	0.10193	130.966	0.07408
9.54041	0.07348	206.343	0.10161	88.0591	0.07016
92.5169	0.07077	230.755	0.11981	66.0089	0.06339
104.912	0.11504	244.783	0.08595	91.2257	0.06649
22.3968	0.09603	147.024	0.13678	189.201	0.09207
75.2091	0.14225	14.9777	0.08636	74.0978	0.06652
112.441	0.18732	130.254	0.1437	60.7596	0.08597
172.254	0.10718	87.4063	0.11232	86.6728	0.06554
172.718	0.09916	38.1686	0.12126	104.281	0.074
204.454	0.11569	107.198	0.12998	126.347	0.10497
73.362	0.09603	117.201	0.12389	125.343	0.10441
160.016	0.15777	154.713	0.09647	151.192	0.06989
84.521	0.11224	69.6911	0.08636	156.524	0.12207
63.3386	0.072	107.869	0.08886	93.308	0.06354
89.2307	0.08	150.388	0.09879	38.9709	0.10197
72.8219	0.14681	80.1211	0.08749	17.9426	0.06763
161.539	0.11471	177.218	0.10727	31.8232	0.08602
49.5558	0.22481	77.0772	0.11238	88.6723	0.13366
47.1812	0.08674	110.561	0.09803	78.7111	0.13717
183.341	0.17594	145.843	0.09651	51.0279	0.06886
99.326	0.06737	91.3093	0.11028	60.2218	0.14879
115.744	0.07971	88.8094	0.11402	81.7917	0.11252
194.543	0.10603	102.606	0.1336	93.5241	0.17565
139.572	0.12682	111.866	0.15209	83.0485	0.09153
165.926	0.07861	156.32	0.18155	89.3955	0.12919
184.385	0.10726	225.219	0.16173	86.8586	0.10603
115.702	0.06671	138.94	0.09427	104.192	0.12006
187.501	0.08958	153.849	0.07256	110.626	0.08796
91.5537	0.08516	198.833	0.11689	128.748	0.07424
140.426	0.10812	150.888	0.14587	110.85	0.06263
101.515	0.10273	218.581	0.07964	115.772	0.07201
187.982	0.15162	163.554	0.09014	133.918	0.09267
109.38	0.07087	184.544	0.10931	114.911	0.13669
123.23	0.10812	181.632	0.09332	55.4498	0.07535
132.134	0.12042	197.732	0.20354	41.8208	0.15443
153.002	0.13764	231.042	0.11051	135.628	0.20149
101.163	0.07971	202.194	0.07246	66.2628	0.08958
146.609	0.09387	213.251	0.13789	111.887	0.22482
149.551	0.14757	219.406	0.10013	177.146	0.1527
118.856	0.10812	221.782	0.10379	73.4842	0.14061
144.401	0.10184	219.66	0.16484	116.528	0.15443
177.775	0.138	277.159	0.09312	110.189	0.10758
177.616	0.10273	227.796	0.11412	149.244	0.09583
220.115	0.12896	235.602	0.12172	121.951	0.08925
234.017	0.09432	229.823	0.15273	142.871	0.16992
161.348	0.15998	87.3803	0.09996	164.262	0.09824
167.154	0.06205	73.9009	0.13091	71.1809	0.1143
183.866	0.11395	107.726	0.11995	69.1586	0.10797
44.6099	0.22811	116.595	0.09756	130.719	0.11948
89.4254	0.31004	45.3387	0.08143	13.8615	0.13756
62.5376	0.1605	151.03	0.07919	112.252	0.0837
25.1624	0.24041	34.8026	0.13735	121.748	0.26376
45.0852	0.21441	179.517	0.1155	112.346	0.07986
92.6654	0.15449	46.5011	0.10062	83.0828	0.15201
42.9689	0.22493	40.5478	0.09658	85.2625	0.07636
67.006	0.14158	36.1162	0.11729	206.885	0.08634
90.1257	0.17742	189.8	0.08728	135.212	0.14203
73.1792	0.13554	43.7683	0.16611	203.076	0.13511
115.679	0.20147	177.686	0.08635	139.805	0.07748
101.976	0.1632	111.908	0.11995	95.7825	0.23119
124.511	0.25967	60.5305	0.08766	103.475	0.0962
117.959	0.19597	166.736	0.0889	152.315	0.06936
112.114	0.14158	183.321	0.15265	116.661	0.09054
179.039	0.13692	87.1801	0.12508	106.378	0.08813
192.815	0.18085	162.67	0.08516	87.8847	0.0637
227.718	0.14158	102.836	0.16993	203.645	0.08515
108.982	0.13119	81.7102	0.08831	159.431	0.10308
136.745	0.1251	207.94	0.08948	146.717	0.1251
181.607	0.12401	94.6749	0.13164	157.34	0.15862
70.459	0.15873	179.83	0.07385	184.514	0.09761
82.8877	0.10698	108.958	0.08948	163.813	0.14587
53.6626	0.16874	210.446	0.09658	210.118	0.07718
90.543	0.17905	183.067	0.13349	193.464	0.12011
41.2585	0.10138	200.1	0.09448	12.7082	0.29026
182.445	0.09735	154.151	0.09255	132.217	0.12728
103.638	0.11341	182.968	0.08766	56.0817	0.07822
32.5674	0.10698	191.627	0.08948	136.852	0.14877
138.188	0.07061	142.264	0.10888	152.106	0.08268
173.154	0.25841	220.074	0.12316	127.384	0.12816
85.0004	0.22338	161.326	0.10042	44.5726	0.10728
139.972	0.08809	154.58	0.0739	96.2993	0.10914
42.1702	0.11649	205.348	0.07024	98.5434	0.06802
175.406	0.20489	228.733	0.15706	127.376	0.13948
96.2139	0.12782	239.045	0.12135	102.613	0.10323
173.179	0.16022	184.355	0.08179	167.463	0.14273
119.265	0.12488	261.891	0.07559	114.719	0.08118
163.294	0.13767	239.153	0.08386	99.0999	0.11443
97.0883	0.15662	264.832	0.0964	121.547	0.07499
166.809	0.13866	207.866	0.12302	155.254	0.08783
79.1013	0.07538	274.275	0.07097	139.153	0.1113
121.533	0.10138	238.913	0.08636	183.612	0.08783
152.878	0.08626	219.823	0.07118	22.8639	0.12665
161.955	0.14577	237.856	0.15105	119.684	0.11559
100.057	0.22534	72.9522	0.11748	33.4027	0.09929
110.124	0.16055	169.578	0.11469	124.165	0.09549
136.062	0.16793	99.4668	0.14742	139.407	0.13031
130.826	0.13206	32.5708	0.10362	43.3892	0.07021
192.433	0.24672	141.326	0.09305	84.0719	0.0668
180.545	0.15929	46.7569	0.08636	56.5491	0.10194
169.519	0.13289	116.308	0.14381	70.3872	0.06742
142.612	0.12782	157.36	0.07722	78.4096	0.09009
164.098	0.07974	121.828	0.09986	90.5051	0.06566
203.038	0.10831	68.5673	0.1421	155.72	0.1532
153.42	0.11716	69.0722	0.15115	95.9034	0.15601
58.9038	0.09549	115.489	0.13235	95.1911	0.10411
71.3526	0.07505	82.797	0.0822	145.49	0.09956
59.1994	0.06967	92.3377	0.18203	135.882	0.13483
74.5444	0.11949	102.366	0.07722	43.9458	0.09777
128.709	0.08669	158.015	0.09794	96.8281	0.08132
108.847	0.1232	232.029	0.10806	122.712	0.08749
71.3906	0.09998	148.108	0.08487	70.9802	0.08073
142.55	0.08486	178.122	0.09568	37.0563	0.08882
182.331	0.07548	202.191	0.12007	116.708	0.1511
160.152	0.07632	196.687	0.09609	60.776	0.19351
129.035	0.06922	200.498	0.12453	51.0279	0.11923
27.9233	0.22135	194.349	0.10454	38.2313	0.08968
72.745	0.18116	203.805	0.10482	64.2133	0.11674
127.19	0.10288	211.178	0.07655	157.731	0.08075
40.2567	0.0929	213.761	0.08784	65.29	0.09789
29.7246	0.08128	220.1	0.088	75.4726	0.0614
115.487	0.12771	232.729	0.12982	109.964	0.09846
60.1388	0.18582	44.8812	0.08293	136.863	0.07809
27.0483	0.17401	160.924	0.08293	92.9961	0.08977
47.6638	0.12298	151.404	0.08883	107.449	0.12154
76.4302	0.10912	37.5826	0.10405	104.284	0.0585
99.7973	0.08128	172.413	0.1156	110.478	0.19542
39.3501	0.1128	160.312	0.09726	127.127	0.07484
68.7942	0.17877	106.617	0.16952	136.325	0.1076
50.2587	0.154	50.4966	0.16941	162.192	0.19089
114.21	0.09907	149.492	0.16002	27.4911	0.07967
96.1532	0.17004	70.3853	0.09882	90.3084	0.0792
75.3208	0.11285	89.0116	0.22829	110.439	0.09258
66.4232	0.10952	112.051	0.11229	89.915	0.06945
59.5718	0.12149	143.611	0.09467	28.4792	0.14671
77.3849	0.12982	140.804	0.09901	73.4681	0.08916
68.2149	0.12883	193.004	0.1319	48.7944	0.16738
65.3176	0.12149	151.395	0.1186	47.4981	0.11702
80.7062	0.08185	243.577	0.11016	37.8616	0.11801
124.901	0.10042	225.643	0.16144	120.74	0.10471
77.582	0.08185	226.773	0.09572	117.271	0.07833
87.1424	0.07565	251.468	0.16971	81.157	0.13403
85.8035	0.11531	203.85	0.17908	76.7988	0.18684
91.433	0.12175	260.886	0.1111	73.2873	0.08313
124.062	0.1309	241.32	0.11707	105.55	0.14916
96.9418	0.10587	263.47	0.12247	94.6083	0.16386
102.855	0.14772	240.508	0.0942	101.763	0.13742
109.262	0.09833	13.5913	0.08166	100.471	0.1167
130.109	0.10376	96.6262	0.12226	102.335	0.11087
144.774	0.16041	90.8604	0.07855	147.916	0.11541
179.28	0.10042	46.8238	0.09411	147.391	0.16612
171.786	0.10282	62.9091	0.10309	146.332	0.11555
39.981	0.22096	24.0291	0.08284	172.495	0.09024
41.822	0.12652	47.8263	0.09417	79.6268	0.13901
61.021	0.20886	93.195	0.11686	26.2453	0.10274
80.6259	0.19748	94.7537	0.08505	73.0073	0.08551
129.315	0.13213	104.596	0.16387	74.8363	0.07035
179.044	0.12258	105.475	0.10017	117.312	0.07831
44.8695	0.13944	53	0.09025	160.086	0.07549
17.9585	0.19293	125.693	0.11447	177.403	0.15858
26.2358	0.09815	86.3368	0.11096	11.8068	0.05814
69.8405	0.21218	101.107	0.07314	204.345	0.08139
52.8406	0.10603	92.5838	0.09262	26.7452	0.08721
60.1767	0.14317	66.7408	0.10061	53.6838	0.09838
56.9263	0.18314	86.1163	0.0832	141.17	0.07239
60.3719	0.14556	66.4678	0.08505	90.4923	0.05963
146.865	0.1481	75.4055	0.11748	204.943	0.06765
123.453	0.09117	129.424	0.08658	127.462	0.0632
141.147	0.13678	114.928	0.17713	103.161	0.08891
115.256	0.10077	98.9897	0.17563	145.367	0.09151
109.771	0.14636	126.894	0.16117	193.957	0.14249
100.261	0.08892	129.8	0.12877	209.485	0.05486
159.953	0.08846	99.0493	0.08165	90.3094	0.08201
99.0211	0.12965	115.401	0.14771	188.243	0.08877
144.966	0.09906	118.217	0.12026	199.897	0.12071
143.095	0.09117	135.908	0.09508	17.0885	0.14019
136.647	0.09362	142.939	0.12808	176.911	0.07991
159.941	0.10799	139.841	0.11447	139.86	0.10225
214.414	0.14256	143.794	0.1465	160	0.1398
27.1982	0.12904	156.848	0.11751	58.0488	0.106
199.509	0.07544	153.374	0.12748	155.295	0.1102
111.767	0.10691	160.369	0.08883	110.135	0.09004
99.8152	0.17204	174.275	0.20993	91.9462	0.06952
130.879	0.31039	173.924	0.13106	84.4395	0.06027
93.6283	0.19076	163.573	0.16016	117.373	0.11721
35.5335	0.15361	161.734	0.12259	176.174	0.1008
21.8565	0.28842	197.932	0.09742	132.544	0.09634
169.597	0.08953	199.988	0.08005	102.05	0.08497
52.42	0.14577	187.783	0.12569	111.252	0.11562
28.0662	0.13574	197.499	0.09816	115.645	0.11843
152.508	0.12047	206.841	0.08005	127.588	0.12001
110.396	0.25772	192.535	0.10101	185.595	0.08738
146.347	0.12082	198.265	0.09623	47.4396	0.07358
182.45	0.11162	198.779	0.10929	222.422	0.12599
162.989	0.08137	209.557	0.08737	74.9894	0.09045
41.0619	0.16308	224.795	0.08005	93.6943	0.18196
211.046	0.06994	230.551	0.11447	99.7235	0.09526
50.767	0.1048	217.399	0.11208	182.025	0.07294
51.2816	0.17124	33.8304	0.08908	168.477	0.07907
90.5086	0.22967	104.257	0.14357	125.229	0.09909
60.013	0.10982	33.6125	0.10714	183.332	0.08822
118.445	0.08754	49.7238	0.09422	150.614	0.0855
79.4637	0.13256	59.4916	0.08618	93.4177	0.07727
106.224	0.11008	58.6284	0.07609	61.5992	0.1395
186.963	0.13628	117.134	0.07775	122.17	0.12205
82.9207	0.09154	92.7574	0.12415	77.2591	0.09123
177.604	0.17874	48.5345	0.10383	92.1431	0.08723
176.473	0.26208	97.2279	0.08463	129.299	0.07819
155.525	0.11008	54.1612	0.09567	180.555	0.09787
145.187	0.17091	81.8303	0.11959	77.4356	0.04327
124.473	0.16344	60.4831	0.11458	38.1782	0.05355
135.466	0.12638	95.8298	0.07609	97.0274	0.12984
121.184	0.09264	69.2376	0.13437	71.4247	0.0853
151.077	0.0921	140.066	0.11766	41.5823	0.09326
232.338	0.08392	107.098	0.07293	61.1725	0.06849
173.172	0.22466	122.294	0.08463	82.1862	0.06926
214.122	0.10291	131.039	0.07947	136.024	0.0816
162.022	0.10499	128.174	0.17017	103.655	0.08932
138.439	0.08739	181.632	0.12769	75.9788	0.10892
220.868	0.11008	168.74	0.0847	114.265	0.10464
200.76	0.09884	144.519	0.09799	79.4066	0.09003
193.548	0.11841	154.837	0.09529	127.161	0.11868
33.1915	0.09665	162.684	0.13569	8.4547	0.2617
112.404	0.10619	179.37	0.10095	36.1645	0.07651
155.642	0.13879	187.156	0.11484	53.976	0.10507
86.7443	0.21149	173.757	0.08102	138.126	0.06362
135.955	0.10735	178.267	0.07885	62.0943	0.0821
109.515	0.12414	205.303	0.09113	76.3752	0.09644
93.5651	0.1051	201.173	0.10956	78.7709	0.09404
95.0639	0.10979	217.885	0.09879	120.5	0.09394
147.691	0.12218	211.084	0.11092	146.197	0.0866
228.781	0.14935	229.714	0.08939	145.908	0.04827
56.8819	0.13531	210.333	0.13303	86.6245	0.1479
69.5993	0.10171	217.397	0.07947	56.1625	0.09525
107.191	0.1694	220.148	0.1276	50.5848	0.09548
167.42	0.0797	216.82	0.17383	41.5253	0.06128
199.315	0.09316	113.314	0.18506	94.592	0.21322
66.2512	0.18883	84.8255	0.08636	28.4736	0.29089
154.494	0.10094	74.367	0.09798	94.1383	0.08233
64.8566	0.10481	40.5054	0.09609	51.4443	0.0699
155.584	0.0828	75.5924	0.12063	57.8717	0.12853
40.0493	0.08716	112.019	0.11105	75.4819	0.06349
53.8153	0.12146	161.636	0.0925	84.4949	0.09723
116.841	0.07757	86.5814	0.08822	80.6743	0.07278
191.17	0.11287	93.693	0.08359	130.043	0.08985
177.176	0.08203	103.806	0.12044	103.006	0.08537
159.156	0.07751	139.204	0.09847	118.049	0.07461
107.778	0.1257	132.875	0.15577	155.572	0.09874
154.759	0.20536	159.549	0.08229	18.3767	0.07814
132.546	0.21024	171.815	0.10146	48.1717	0.08889
68.5073	0.15311	143.972	0.09748	88.1313	0.09047
114.787	0.15311	149.614	0.09568	107.092	0.07996
174.456	0.13942	166.992	0.12063	95.8166	0.11569
158.498	0.07923	206.833	0.16485	151.727	0.12734
99.8489	0.08473	215.452	0.11468	80.0499	0.0844
123.049	0.11313	229.327	0.10454	11.6578	0.25307
144.401	0.15939	125.047	0.10564	46.8469	0.11722
137.731	0.17245	187.632	0.08368	178.522	0.08068
191.71	0.10193	134.669	0.13833	172.063	0.08751
179.807	0.10494	96.7395	0.10913	136.257	0.06642
140.346	0.08716	190.092	0.15379	113.299	0.06776
211.472	0.15074	59.8609	0.1259	183.951	0.092
178.169	0.11952	195.86	0.07414	151.789	0.06929
19.981	0.1391	81.8109	0.08269	81.0337	0.09141
112.001	0.14674	128.214	0.14186	86.85	0.09561
68.2085	0.13674	85.5241	0.08587	74.2282	0.07449
102.828	0.13249	96.5684	0.07658	167.678	0.11006
29.2584	0.25031	105.034	0.0792	28.4674	0.14543
42.5677	0.08864	100.808	0.08409	118.719	0.07934
71.001	0.13407	140.529	0.09586	66.1633	0.07594
74.5783	0.06787	243.617	0.11519	49.2005	0.12129
105.848	0.0874	147.783	0.08986	122.277	0.13777
104.671	0.1037	214.903	0.10114	159.674	0.08695
78.0588	0.10224	209.019	0.11174	45.5168	0.0721
68.2803	0.07991	251.768	0.08409	68.4778	0.1653
90.7198	0.10891	24.8458	0.09102	117.356	0.11025
76.533	0.07888	19.8404	0.07912	67.4261	0.11901
100.008	0.09198	106.556	0.09349	104.706	0.14264
107.551	0.06969	67.8853	0.09102	126.189	0.06976
99.3481	0.09947	127.587	0.11232	118.641	0.11095
94.9824	0.22938	53.8468	0.12522	112.622	0.09565
87.4528	0.07991	39.0818	0.12133	133.743	0.14929
90.6853	0.15662	64.8234	0.12538	176.963	0.12486
91.6949	0.11731	99.0369	0.12402	167.223	0.08925
121.691	0.12539	50.3802	0.11635	93.4867	0.07462
113.993	0.11829	105.573	0.10038	47.4619	0.10192
142.085	0.07991	47.4048	0.07605	76.5583	0.07955
153.666	0.07552	51.8284	0.10746	78.5108	0.1003
172.599	0.08864	93.9734	0.10097	130.369	0.10499
191.02	0.1483	63.8435	0.13294	52.1737	0.09826
43.149	0.10084	74.1462	0.15048	40.7967	0.10395
13.7821	0.13871	112.079	0.08692	40.2075	0.17522
50.4999	0.17534	120.618	0.1117	40.5603	0.12578
41.8888	0.09653	79.2247	0.09191	81.4549	0.11752
32.6335	0.11041	106.573	0.15315	85.5205	0.12216
99.8499	0.11986	120.301	0.11725	113.613	0.09051
48.2608	0.10245	118.727	0.17692	76.3939	0.11818
80.6623	0.09271	117.302	0.14475	87.6941	0.12464
105.622	0.09438	134.339	0.14583	193.979	0.06049
123.479	0.07155	125.424	0.09533	194.884	0.09758
85.4789	0.09653	185.966	0.08701	140.283	0.06929
69.5888	0.13312	159.578	0.11793	38.8663	0.09876
76.5523	0.13312	162.105	0.10746	104.056	0.13768
99.7115	0.09456	189.347	0.10103	133.727	0.06424
154.426	0.17131	152.509	0.19191	28.9121	0.08397
123.877	0.09653	207.658	0.12495	201.004	0.07685
169.045	0.14718	171.001	0.1647	63.7996	0.15421
139.481	0.09112	170.236	0.1132	92.6878	0.06779
193.122	0.10321	187.002	0.09742	76.8104	0.08937
13.1098	0.16182	184.635	0.09166	138.842	0.10298
67.3499	0.11154	212.057	0.14684	167.723	0.09267
10.4111	0.16593	186.398	0.14298	79.1442	0.08389
23.86	0.14203	189.382	0.07984	120.041	0.0632
55.7412	0.15769	220.91	0.08472	142.34	0.07961
31.6802	0.10369	201.925	0.11175	106.18	0.07823
90.342	0.17173	230.134	0.15883	103.752	0.11918
54.4529	0.1003	215.594	0.13513	109.055	0.10407
26.2596	0.14948	221.383	0.1036	155.723	0.08906
58.756	0.21571	234.368	0.12402	120.612	0.08548
84.5401	0.09935	218.151	0.14475	65.5388	0.09678
66.451	0.09219	135.442	0.16669	114.247	0.09725
33.5876	0.07976	107.352	0.25387	67.87	0.10326
40.06	0.16281	51.2805	0.08255	50.8047	0.08908
48.8451	0.19471	143.014	0.1419	45.7892	0.1008
89.7218	0.14749	180.843	0.09102	126.711	0.08044
61.2732	0.16593	29.3559	0.10525	48.8508	0.09377
95.8199	0.13002	82.6336	0.16965	153.222	0.08103
89.4909	0.10339	127.949	0.12133	87.2268	0.1058
90.179	0.10909	209.615	0.1061	65.9003	0.17054
86.1189	0.08106	173.246	0.1176	93.5148	0.06727
87.4716	0.16593	121.317	0.1318	108.551	0.07919
84.6587	0.15452	169.202	0.10038	55.4205	0.08927
84.9513	0.18269	84.365	0.11488	20.8346	0.11547
87.5502	0.11945	199.274	0.10097	88.3633	0.13194
137.954	0.12731	111.487	0.0809	85.4532	0.12765
134.702	0.15207	67.5052	0.19028	114.542	0.10595
113.373	0.13937	222.763	0.1117	51.4378	0.07408
109.396	0.08858	151.77	0.09191	14.3543	0.0619
114.406	0.09219	169.173	0.18554	103.481	0.08575
143.064	0.11154	165.67	0.09191	111.643	0.0857
155.987	0.09415	109.001	0.12885	105.045	0.09272
180.901	0.10613	93.0498	0.10038	81.1109	0.07938
94.4212	0.11252	192.097	0.13032	62.3511	0.10068
24.538	0.1336	99.8545	0.08872	66.7868	0.10682
176.737	0.13543	206.889	0.17692	90.215	0.07039
50.8763	0.1848	108.324	0.1415	115.861	0.09568
84.7326	0.12734	116.945	0.17447	138.794	0.09078
124.215	0.11696	121.718	0.13581	139.463	0.11904
88.8296	0.10303	161.116	0.15548	65.269	0.07997
127.345	0.10531	237.116	0.08573	22.3535	0.10404
199.87	0.10188	126.793	0.08701	133.533	0.14897
123.011	0.17442	133.615	0.07984	162.14	0.0742
115.573	0.11137	135.529	0.10225	78.4989	0.07944
187.944	0.09955	177.922	0.11016	101.199	0.06283
229.793	0.14125	204.774	0.16614	130.038	0.0958
179.985	0.15618	227.474	0.11629	86.6676	0.08233
37.6704	0.32731	196.621	0.10304	77.0361	0.12671
97.8254	0.09312	182.443	0.09191	120.696	0.10179
120.136	0.17173	157.359	0.2043	148.09	0.09744
33.0013	0.10909	160.942	0.20316	113.617	0.09237
25.4554	0.17661	215.783	0.07605	42.2784	0.11036
38.6968	0.12748	185.054	0.13523	78.1157	0.14992
121.848	0.1968	231.854	0.08552	30.6325	0.09415
108.243	0.12355	186.396	0.10309	37.593	0.06533
119.517	0.1123	190.406	0.06721	55.71	0.08027
66.9866	0.12509	197.243	0.09209	41.728	0.07844
109.745	0.09822	209.576	0.12349	77.8259	0.15527
88.7365	0.12748	280.804	0.1036	64.5994	0.07632
113.632	0.18008	81.7608	0.098	97.7042	0.0791
72.5431	0.13002	46.0836	0.13555	63.0727	0.09059
70.9647	0.13002	120.118	0.07786	65.8499	0.06214
64.3992	0.10844	60.4188	0.1459	72.9021	0.07393
66.0432	0.09415	104.497	0.10441	101.37	0.07763
109.944	0.10339	136.432	0.09904	93.4742	0.07622
81.975	0.25235	116.253	0.12505	106.334	0.22502
79.2565	0.09415	165.788	0.09241	124.251	0.19583
81.2974	0.08693	128.985	0.07786	134.066	0.09731
91.6731	0.18269	153.555	0.09674	53.7536	0.07433
89.9569	0.24314	151.958	0.11301	67.0524	0.07994
140.793	0.1974	204.89	0.14959	69.0967	0.07458
120.414	0.09546	128.735	0.10215	73.2568	0.07918
112.385	0.10084	71.0037	0.07858	132.952	0.07978
105.841	0.13937	110.585	0.08743	74.2912	0.24367
156.414	0.17522	73.6402	0.09657	76.1729	0.0795
169.67	0.14203	69.9531	0.10628	76.1722	0.1396
60.2025	0.13586	115.721	0.07983	97.5465	0.13188
92.1251	0.21169	122.347	0.0816	188.878	0.08552
47.6776	0.15158	133.291	0.13261	109.517	0.11616
82.645	0.15075	181.464	0.09957	98.3769	0.12016
53.8907	0.11154	217.285	0.08196	131.527	0.1442
89.2638	0.14184	107.515	0.09087	104.392	0.09853
85.1769	0.14498	28.6813	0.15341	143.869	0.07633
58.7963	0.10029	135.595	0.11885	176.925	0.19448
80.9433	0.08772	48.1748	0.10441	68.4266	0.08741
98.0756	0.13271	82.674	0.08315	56.2096	0.07181
91.8978	0.12494	66.6842	0.09431	105.842	0.09316
78.8727	0.0812	79.5236	0.08592	64.4063	0.14729
63.2399	0.16261	47.8522	0.09809	62.5985	0.07312
97.4178	0.1735	75.6579	0.11649	31.3751	0.08965
80.6466	0.0935	62.2327	0.10316	72.7775	0.2359
78.5271	0.14336	145.372	0.12213	77.1893	0.09564
82.0568	0.15358	124.392	0.08042	98.1027	0.07255
111.496	0.22569	75.7341	0.13822	57.4523	0.18271
103.221	0.11007	108.242	0.10406	66.4033	0.06305
95.7628	0.09531	136.068	0.07544	66.2181	0.15305
112.188	0.07508	129.26	0.09998	87.0196	0.08039
135.051	0.26515	112.848	0.09616	91.6904	0.09273
147.125	0.11487	135.357	0.10658	108.47	0.10793
153.85	0.16261	123.223	0.20311	138.276	0.18185
149.385	0.08567	138.605	0.09699	112.535	0.09221
209.234	0.11154	196.736	0.10256	135.274	0.09742
41.7311	0.15949	152.247	0.10898	145.696	0.06034
66.1441	0.1473	131.878	0.09998	92.381	0.10714
71.8758	0.13364	166.558	0.13776	84.0804	0.1289
99.4743	0.11423	136.831	0.09814	56.8168	0.09071
90.028	0.13274	146.768	0.14285	117.005	0.08797
58.3706	0.21354	216.451	0.10097	38.2262	0.1629
90.2922	0.1724	199.609	0.09998	75.4603	0.17334
89.9498	0.13268	212.994	0.10247	100.321	0.11477
140.307	0.13274	188.641	0.09411	56.8144	0.22491
103.868	0.13268	184.027	0.1001	67.9884	0.05634
102.974	0.20642	194.605	0.09411	81.6475	0.06887
134.663	0.13268	206.95	0.13896	147.002	0.13346
171.072	0.15754	238.832	0.10593	152.378	0.12728
7.33811	0.09164	127.557	0.11865	97.5678	0.09995
32.4018	0.17765	32.9354	0.17039	131.05	0.08195
17.1497	0.11706	161.141	0.08617	106.296	0.10728
93.3756	0.12141	118.271	0.09221	149.507	0.07377
23.871	0.14779	42.1126	0.13826	45.6044	0.05356
147.853	0.12301	92.986	0.08968	71.1763	0.07494
34.7043	0.08909	61.9196	0.10052	70.0676	0.06244
176.485	0.07299	194.204	0.08848	101.888	0.08551
29.3782	0.11705	141.447	0.23002	33.269	0.10052
91.6597	0.06692	93.3638	0.08536	177.839	0.13237
37.6904	0.09362	102.682	0.11455	35.559	0.08862
55.8211	0.101	135.765	0.0945	65.8298	0.28044
151.477	0.10594	123.962	0.07261	90.0094	0.12525
124.702	0.11007	137.067	0.12103	101.388	0.102
60.5779	0.11797	193.663	0.10142	112.671	0.08087
141.297	0.09458	172.984	0.13864	41.3907	0.12782
92.9223	0.14779	209.78	0.085	72.3581	0.15843
103.022	0.10332	184.64	0.11961	129.306	0.16552
124.973	0.12074	192.364	0.16515	77.2717	0.15326
118.833	0.09909	206.113	0.07901	69.5033	0.15296
197.003	0.07544	223.756	0.10003	71.3158	0.09354
134.126	0.13335	150.421	0.09646	126.811	0.11258
121.106	0.1398	159.59	0.11976	97.1933	0.09351
120.053	0.08743	78.6972	0.09255	113.992	0.07017
141.882	0.10594	63.6196	0.09287	79.2369	0.07146
215.172	0.11192	36.2807	0.15313	127.876	0.12512
135.41	0.13644	49.5562	0.09697	55.3092	0.08353
68.1016	0.09337	95.0611	0.1044	85.2107	0.1187
170.983	0.07954	61.0107	0.09047	84.8919	0.1188
206.508	0.08226	140.955	0.09781	151.208	0.07723
120.381	0.12189	83.3446	0.15517	163.575	0.08986
202.808	0.1481	69.3467	0.11205	23.095	0.08458
145.387	0.08602	68.8108	0.12903	35.5152	0.11338
118.494	0.11786	114.758	0.09682	114.289	0.17333
143.043	0.08984	145.162	0.14223	40.8855	0.18727
66.0416	0.08984	83.4745	0.07557	67.7487	0.06901
177.542	0.10934	92.9662	0.10243	102.946	0.0742
186.047	0.17384	164.918	0.13541	60.2706	0.07136
167.779	0.1076	122.848	0.11627	120.07	0.16116
99.1109	0.08104	148.969	0.10944	111.414	0.0729
117.104	0.08984	122.827	0.10813	63.258	0.09753
143.623	0.20467	122.8	0.12933	105.031	0.09268
218.053	0.16703	172.842	0.08701	63.0136	0.07739
232.062	0.09908	185.342	0.10521	74.511	0.07888
15.891	0.10478	131.735	0.10103	147.263	0.08073
43.1234	0.13312	130.612	0.08425	132.487	0.10197
47.3085	0.07675	171.25	0.09697	128.144	0.10226
59.6444	0.12189	194.12	0.12698	63.709	0.10148
32.7236	0.11312	154.331	0.11205	129.151	0.08889
64.6831	0.08566	223.809	0.0749	114.803	0.09803
75.1949	0.07811	158.557	0.09998	43.5384	0.0838
88.5614	0.08643	190.541	0.08555	50.1053	0.07719
90.4943	0.09374	185.904	0.08144	103.079	0.10949
147.029	0.11119	193.303	0.12748	130.866	0.09096
148.383	0.09908	96.5594	0.09579	124.981	0.0848
183.081	0.24329	54.2336	0.14106	90.8763	0.08309
30.0952	0.13984	118.273	0.09415	65.4122	0.12212
51.0171	0.08256	82.1111	0.1005	121.267	0.06049
34.0455	0.0672	72.0893	0.09478	132.72	0.11211
79.2231	0.07294	112.067	0.10807	143.551	0.09929
41.4617	0.07237	140.859	0.0996	28.258	0.06468
120.837	0.10991	143.512	0.10398	50.5136	0.0963
53.2522	0.09956	179.693	0.108	59.4654	0.08465
170.361	0.08496	216.823	0.10624	158.686	0.09584
97.0542	0.07341	38.8352	0.09062	91.1002	0.07822
112.822	0.09702	11.0447	0.07448	101.288	0.09927
80.7273	0.12453	24.2513	0.07815	49.1662	0.08034
45.4661	0.23835	87.7623	0.15383	108.631	0.11977
104.907	0.13022	164.903	0.1285	149.252	0.07468
141.837	0.12198	177.834	0.08063	107.228	0.21157
88.8987	0.10094	69.0576	0.08789	162.67	0.18139
20.5305	0.11569	197.448	0.07842	136.12	0.06266
33.4355	0.15793	160.781	0.07502	167.381	0.07955
119.976	0.1312	31.054	0.19092	145.715	0.0798
41.4461	0.09038	69.7407	0.098	126.616	0.08649
93.2273	0.1153	186.491	0.08611	141.298	0.09108
65.4034	0.1036	43.9822	0.10112	192.395	0.0867
150.163	0.0985	57.3394	0.14983	71.0809	0.07893
165.363	0.18631	61.3171	0.09499	64.712	0.09521
131.725	0.10809	209.52	0.11342	61.6073	0.1563
108.716	0.18398	137.566	0.0978	89.2594	0.14751
120.353	0.19217	155.155	0.0844	70.34	0.08467
74.1241	0.13333	67.7909	0.09592	39.3129	0.10368
80.6102	0.13927	151.378	0.15848	55.26	0.12606
88.948	0.09881	94.4632	0.09658	99.0984	0.14514
221.544	0.1153	178.02	0.13943	31.2812	0.08326
158.369	0.32996	86.3565	0.09461	55.9121	0.07134
117.084	0.10094	161.503	0.07542	78.1432	0.16287
205.804	0.1153	189.564	0.0838	37.939	0.10826
243.15	0.10849	146.468	0.13232	56.2416	0.08871
86.0303	0.10339	222.763	0.12054	93.9344	0.07434
35.3316	0.08642	118.812	0.19036	44.0425	0.14435
43.5123	0.13806	126.774	0.11636	64.7803	0.14571
36.3343	0.12319	123.385	0.14534	54.0059	0.12643
97.8476	0.16745	202.816	0.1242	73.5424	0.10813
71.8157	0.15172	121.637	0.12817	93.2976	0.09346
27.3441	0.09526	124.535	0.11251	77.0418	0.13407
60.6945	0.13525	190.061	0.10777	107.128	0.13702
39.2391	0.10253	212.844	0.10328	105.775	0.11026
65.9263	0.08736	148.793	0.09349	86.4872	0.09871
77.9655	0.0905	160.482	0.11179	186.292	0.09464
43.0969	0.13644	201.163	0.10377	61.3635	0.08982
65.0595	0.11963	160.665	0.11601	70.5403	0.10276
96.9223	0.09028	180.402	0.09379	112.141	0.12655
80.7968	0.09908	217.242	0.2055	154.275	0.08356
115.423	0.12872	192.487	0.15772	145.604	0.13572
88.424	0.11797	174.313	0.15765	132.15	0.07572
150.912	0.13644	238.827	0.15256	160.325	0.10276
137.101	0.11341	191.231	0.16729	24.6429	0.09448
101.353	0.17716	229.792	0.14391	36.0887	0.07835
121.334	0.10583	243.785	0.11601	46.9499	0.17469
121.223	0.11677	38.3539	0.09873	89.0913	0.07044
16.5682	0.12866	87.1755	0.16988	75.581	0.07815
156.687	0.08787	50.5504	0.12708	24.6011	0.17373
142.098	0.09507	81.0001	0.08984	43.5525	0.09724
141.864	0.09822	99.1195	0.11585	63.8595	0.16659
69.6869	0.09609	80.659	0.10367	36.1438	0.06548
42.7372	0.09415	90.5758	0.07496	44.6761	0.21116
120.185	0.08106	77.1117	0.10548	95.5613	0.26053
77.7344	0.09415	123.13	0.1045	73.5306	0.15665
103.506	0.12866	93.2994	0.14119	22.7987	0.06468
181.886	0.09822	135.229	0.11115	64.8513	0.14248
92.2724	0.12509	111.504	0.12294	27.8762	0.06917
95.3197	0.09415	155.103	0.12336	42.8356	0.06758
175.534	0.09507	165.992	0.08665	57.8296	0.08923
100.87	0.13937	177.542	0.08193	116.88	0.10725
116.983	0.08858	170.742	0.09184	84.7511	0.09509
131.339	0.09624	176.343	0.10027	60.4427	0.08923
142.132	0.11905	203.748	0.13738	72.9061	0.09261
65.9923	0.17817	187.837	0.13872	65.7221	0.16122
85.4101	0.21995	195.791	0.07903	92.158	0.1417
163.932	0.13851	154.151	0.16271	111.416	0.07143
162.799	0.18092	83.6917	0.14115	124.457	0.06756
78.762	0.10494	68.3931	0.11516	46.076	0.13473
103.528	0.07365	73.1158	0.1345	44.1531	0.07603
9.06426	0.32165	205.509	0.10245	65.8828	0.09853
132.787	0.15093	192.845	0.08606	43.9759	0.09668
37.7945	0.11048	255.987	0.12454	78.9979	0.10046
27.1252	0.12444	272.666	0.13081	109.277	0.11868
58.9458	0.14382	197.063	0.10247	115.962	0.07035
38.2891	0.12832	273.025	0.08592	74.4824	0.07322
38.7252	0.18688	105.789	0.13078	35.3113	0.08342
66.0246	0.16108	130.516	0.11203	110.228	0.08108
55.6803	0.1235	11.8273	0.08721	17.8131	0.07633
135.03	0.0989	32.3191	0.07841	31.9843	0.0699
43.8881	0.1015	76.6695	0.11771	33.1144	0.07031
60.8222	0.09392	122.081	0.09085	51.8151	0.07758
64.1689	0.09899	41.3307	0.18271	63.0809	0.0745
62.7416	0.09281	65.5009	0.13486	134.035	0.06464
124.176	0.21745	59.4511	0.08871	52.9429	0.12993
103.872	0.14814	51.675	0.13078	35.5621	0.09546
94.2995	0.13236	73.2468	0.08886	21.4883	0.17369
77.0098	0.10414	65.4555	0.10018	132.038	0.08062
86.6267	0.15733	81.9425	0.11103	71.0835	0.08664
73.4405	0.0966	68.7337	0.1158	134.351	0.11216
102.457	0.13297	171.548	0.10808	59.7523	0.13345
93.959	0.13072	102.496	0.11869	119.88	0.117
93.8148	0.12444	74.2543	0.12382	68.072	0.12229
138.785	0.10954	73.8568	0.18481	104.519	0.08655
123.281	0.21216	142.154	0.08224	84.7169	0.07826
162.364	0.09006	76.9607	0.0866	129.436	0.06955
118.083	0.07238	91.3743	0.11477	109.252	0.06731
110.746	0.15806	97.319	0.21003	59.8329	0.08767
178.923	0.06619	96.3446	0.0866	109.15	0.13622
154.804	0.10066	94.897	0.0866	57.8383	0.11329
198.911	0.09432	117.822	0.07697	68.352	0.09361
24.8054	0.07177	137.764	0.10768	87.1716	0.10441
54.6003	0.06595	160.368	0.09387	134.25	0.09636
114.208	0.07351	136.667	0.08853	66.2981	0.19386
83.2011	0.06239	156.113	0.10018	44.2771	0.1816
20.9547	0.06525	139.238	0.08224	23.6374	0.08666
55.1306	0.08812	150.316	0.11477	51.0221	0.09775
81.4621	0.09361	162.514	0.08405	62.6046	0.18591
35.3371	0.10405	170.799	0.12323	16.0678	0.07898
45.7599	0.06629	186.301	0.11431	21.217	0.07719
58.4305	0.0954	180.272	0.09862	81.4107	0.17937
88.7068	0.09167	212.503	0.10812	63.932	0.08687
104.787	0.08812	206.86	0.12552	56.9011	0.11999
66.0434	0.12117	195.836	0.15517	69.2426	0.09963
76.5427	0.09474	193.461	0.11961	93.8388	0.08017
84.0416	0.14162	141.798	0.08194	48.5855	0.08182
144.879	0.1237	179.337	0.0792	44.0019	0.06165
139.633	0.14476	56.2487	0.11968	24.9149	0.10739
93.5713	0.1454	14.2107	0.13892	72.4599	0.08582
91.3122	0.11196	174.703	0.10556	92.3754	0.08582
95.5546	0.17724	187.606	0.13539	46.7199	0.09852
107.523	0.12195	207.076	0.08968	42.1338	0.1266
112.005	0.08083	170.245	0.143	45.5878	0.10114
128.33	0.07237	32.1676	0.12121	31.8834	0.08759
129.705	0.1173	25.8163	0.13679	21.3097	0.1347
171.51	0.13927	165.358	0.09079	87.5752	0.1205
147.255	0.08186	126.701	0.14713	40.7533	0.10609
149.081	0.09556	76.1063	0.13902	41.6979	0.0767
94.5331	0.37367	37.4797	0.09079	66.5883	0.20295
36.5528	0.15723	44.9648	0.09807	54.7424	0.12517
13.5784	0.13439	115.602	0.08904	83.7938	0.15957
23.3846	0.18549	157.751	0.08967	17.2018	0.12466
168.566	0.10829	103.471	0.12183	141.872	0.19014
139.361	0.20537	53.2539	0.12558	48.1606	0.09985
154.579	0.21549	218.238	0.06766	101.511	0.13398
98.5059	0.21359	158.552	0.08967	52.8897	0.08787
110.006	0.16824	79.5284	0.09079	128.964	0.08971
133.616	0.13934	86.8909	0.1599	66.3264	0.08944
195.513	0.10829	168.514	0.08496	93.1154	0.11369
158.405	0.12329	200.455	0.10807	85.4891	0.13909
44.8116	0.11757	109.144	0.10093	113.383	0.09297
103.182	0.09787	92.843	0.08573	45.7521	0.19556
138.596	0.10198	103.624	0.1599	15.2012	0.07813
58.5891	0.06984	149.211	0.08793	31.4617	0.14307
123.954	0.08327	233.198	0.14638	49.7074	0.12069
36.006	0.06076	107.783	0.0961	72.1471	0.07909
134.716	0.15236	150.364	0.1201	130.34	0.12124
77.1116	0.14118	127.577	0.06203	16.3	0.07414
110.281	0.09523	197.71	0.16382	48.2038	0.09367
112.042	0.08913	119.636	0.08893	34.8452	0.11179
62.6247	0.07938	121.316	0.11206	54.6433	0.08068
72.7665	0.08186	218.726	0.09352	43.3942	0.12811
85.3852	0.10742	135.769	0.12822	54.478	0.13052
158.553	0.06695	133.286	0.13902	103.12	0.066
87.9398	0.08378	133.491	0.09697	114.8	0.07831
104.036	0.08449	204.786	0.08368	114.594	0.16391
157.535	0.09033	171.484	0.13177	15.5246	0.0827
122.907	0.09337	220.791	0.09538	88.0905	0.1266
187.334	0.09337	172.414	0.10366	12.6088	0.2257
137.079	0.07871	210.144	0.07393	49.2198	0.09939
167.665	0.07827	196.015	0.13032	47.2979	0.09331
57.0907	0.09809	189.15	0.07443	41.1154	0.11672
27.2355	0.09651	192.607	0.10354	72.3923	0.09787
91.361	0.12062	202.16	0.10093	29.9943	0.14261
139.684	0.09629	47.7195	0.10478	92.1189	0.10281
115.92	0.07499	38.1234	0.08966	16.201	0.07984
90.8377	0.09651	38.145	0.08503	40.9461	0.05485
125.922	0.06726	62.0177	0.0804	39.3703	0.07907
171.903	0.09067	142.595	0.08312	93.8557	0.07345
73.36	0.11326	156.677	0.10958	61.0474	0.12889
93.8103	0.28536	68.6988	0.11492	157.627	0.05015
89.9649	0.16752	78.2797	0.1396	126.563	0.13016
34.3034	0.32955	125.786	0.11173	171.646	0.04624
60.4348	0.13626	154.724	0.07879	141.143	0.1051
56.4203	0.10282	161.123	0.0885	156.266	0.09484
81.9643	0.09307	122.843	0.09561	239.527	0.06127
77.1031	0.10478	129.262	0.1018	87.5109	0.06005
69.4642	0.30272	192.592	0.09848	161.868	0.04834
55.3555	0.12234	150.03	0.1314	85.2262	0.04155
73.8248	0.35288	215.761	0.09085	23.0876	0.06319
58.4704	0.09756	163.224	0.08576	39.8399	0.05941
61.5724	0.13065	210.974	0.1191	64.4303	0.05442
62.4984	0.11218	219.219	0.09947	85.5177	0.0508
96.9825	0.19563	231.196	0.10259	73.3858	0.0563
87.6097	0.19685	208.798	0.18593	81.8081	0.0994
95.5118	0.11986	99.3208	0.11096	124.549	0.08251
16.6442	0.13058	21.9373	0.10534	158.302	0.0724
130.715	0.09098	153.811	0.09157	164.091	0.09551
64.9907	0.10024	130.567	0.11096	210.064	0.1346
126.469	0.11467	162.91	0.10327	222.59	0.07214
68.7326	0.12819	63.2383	0.11238	27.6213	0.0537
67.6903	0.2064	71.2182	0.12589	71.7116	0.07979
109.876	0.22394	121.502	0.13244	20.0929	0.08119
58.9044	0.09653	119.085	0.1117	18.4112	0.05039
64.0338	0.0893	233.948	0.13093	74.4092	0.10626
81.0446	0.11986	187.7	0.13446	47.9343	0.11549
75.2354	0.13058	198.501	0.15116	105.002	0.10121
103.754	0.18042	187.507	0.09647	74.6895	0.08044
82.3731	0.10245	9.16044	0.1498	85.2204	0.1402
84.6699	0.14174	104.139	0.13244	122.286	0.14527
95.1831	0.12593	58.2292	0.08853	82.4621	0.11705
96.0441	0.11008	160.674	0.1574	123.112	0.09346
148.043	0.08214	31.6515	0.08734	101.648	0.06338
161.833	0.10576	117.01	0.14424	91.6975	0.08976
133.641	0.09529	82.4378	0.17066	151.927	0.10185
127.104	0.09438	163.801	0.11066	111.492	0.0892
181.576	0.1085	154.613	0.10983	113.257	0.09349
170.107	0.12198	179.866	0.16927	103.936	0.18945
131.792	0.1556	124.603	0.11642	107.258	0.13307
35.5962	0.09181	223.142	0.09241	118.179	0.14673
22.2314	0.07615	185.729	0.13251	117.765	0.18912
55.6208	0.07757	120.013	0.11414	126.259	0.09021
33.6931	0.17206	117.735	0.09948	148.131	0.08788
33.0838	0.10623	217.817	0.09575	156.75	0.0981
61.9564	0.15043	154.092	0.11301	170.181	0.07082
48.8979	0.20624	237.93	0.11488	180.736	0.09984
132.047	0.07954	216.343	0.10983	201.754	0.07768
34.8287	0.09606	167.423	0.08976	242.087	0.09514
41.5204	0.12319	149.855	0.10555	227.686	0.07263
51.7815	0.13065	160.428	0.12353	87.0606	0.06246
55.3977	0.09432	211.856	0.08001	18.2422	0.05612
119.219	0.15805	208.537	0.21139	145.922	0.06746
98.0043	0.11117	183.42	0.10058	189.633	0.07201
69.083	0.09789	249.765	0.14398	9.8446	0.09268
79.1647	0.09179	40.9898	0.12126	23.5636	0.06786
94.9697	0.1556	58.9209	0.07834	50.793	0.04383
175.267	0.07954	51.0489	0.09157	31.9563	0.04904
85.4469	0.12457	62.4276	0.1313	68.7186	0.1249
116.32	0.26236	140.014	0.09987	87.7969	0.07037
96.4098	0.10397	131.55	0.11215	161.442	0.05458
97.9383	0.08163	78.5818	0.08315	93.6579	0.14391
101.811	0.14779	96.9858	0.24857	93.7743	0.11196
148.933	0.14448	102.44	0.075	168.792	0.10227
191.302	0.09107	109.489	0.10415	144.763	0.08313
151.837	0.20271	118.7	0.13552	228.252	0.06423
78.5586	0.11862	134.705	0.07087	106.535	0.06206
162.23	0.11747	155.244	0.07288	19.5083	0.05365
131.375	0.07466	217.861	0.0832	138.782	0.04917
75.7166	0.1219	172.268	0.16279	89.1285	0.07205
125.603	0.09119	180.795	0.08076	75.9531	0.11087
134.983	0.07861	195.169	0.09784	131.544	0.05691
147.305	0.11568	84.1548	0.17846	167.432	0.08256
59.8715	0.18434	73.6267	0.1308	107.799	0.10163
84.5249	0.08439	177.203	0.14902	192.345	0.06127
107.994	0.1556	149.858	0.12436	149.899	0.09291
100.067	0.08334	31.1411	0.12761	172.813	0.0741
171.757	0.09185	171.586	0.08749	213.885	0.07638
101.209	0.12709	132.24	0.1374	227.894	0.04133
186.308	0.1253	78.8644	0.09647	123.772	0.08782
79.8606	0.1498	201.968	0.12998	65.2456	0.0754
179.308	0.14086	39.5288	0.1399	123.671	0.07281
94.8695	0.28042	119.447	0.11947	113.21	0.07249
105.601	0.14609	43.5452	0.07353	138.102	0.09856
128.789	0.11857	56.9914	0.13484	180.517	0.09524
174.444	0.0752	223.574	0.17772	134.582	0.08469
114.316	0.09374	166.707	0.15018	165.753	0.07571
203.919	0.1498	161.473	0.09651	232.755	0.06688
134.481	0.11433	96.0414	0.20008	210.774	0.07681
44.2051	0.09492	72.8568	0.12761	212.378	0.06276
19.3336	0.11421	171.115	0.13689	86.1467	0.05387
119.272	0.1076	203.901	0.09975	158.618	0.06558
138.205	0.09256	105.588	0.08458	124.635	0.0533
48.5387	0.11598	83.6946	0.12268	87.7256	0.05729
56.1459	0.11473	97.1916	0.12268	100.7	0.09796
80.6596	0.08787	197.945	0.13641	99.1915	0.12489
33.1043	0.08787	148.474	0.1115	176.971	0.0924
115.322	0.1068	99.341	0.11858	166.095	0.13585
61.0529	0.08787	148.544	0.1308	127.324	0.10455
123.729	0.09711	100.192	0.07256	103.832	0.10095
52.5354	0.0789	122.008	0.13289	114.438	0.0582
53.1175	0.07907	198.166	0.13592	131.641	0.06935
90.6951	0.07757	111.318	0.07353	152.639	0.08316
83.9401	0.0848	194.715	0.08758	141.53	0.14089
152.682	0.09744	219.366	0.14538	156.341	0.0699
139.341	0.1034	128.114	0.1374	56.5589	0.05312
78.3677	0.09883	150.785	0.09019	58.8701	0.05136
94.0286	0.08591	130.947	0.15359	33.2746	0.10637
115.243	0.08996	202.293	0.08237	19.9371	0.05691
105.617	0.0848	218.138	0.11051	48.5601	0.04883
112.417	0.15593	188.301	0.13789	87.5336	0.0728
126.681	0.10901	163.486	0.10939	81.1751	0.10163
149.573	0.10181	165.257	0.11028	82.042	0.07703
52.1485	0.12021	171.745	0.08265	123.162	0.1055
103.447	0.09397	188.421	0.07785	113.17	0.07431
87.5065	0.12074	179.969	0.18659	116.652	0.06556
64.6202	0.20134	181.778	0.07666	118.62	0.10253
38.4808	0.09627	193.873	0.10727	121.121	0.08841
21.5677	0.06928	77.4905	0.16973	150.168	0.08304
29.1614	0.11207	32.7947	0.10459	155.606	0.08466
76.1423	0.08226	95.4964	0.26274	182.592	0.06139
45.6778	0.11207	113.347	0.108	188.512	0.05818
134.539	0.08164	133.665	0.12779	212.06	0.09478
148.767	0.30515	124.955	0.13442	37.9488	0.0595
113.794	0.12042	159.058	0.16434	77.5371	0.05735
89.5515	0.11471	177.615	0.08694	33.8595	0.07151
101.478	0.18022	35.1352	0.11367	50.7469	0.08345
55.1825	0.20142	154.88	0.0921	70.8243	0.05778
60.4154	0.12896	22.4923	0.11625	77.2576	0.07853
68.4186	0.10913	110.26	0.09227	93.3512	0.0703
82.3636	0.11887	74.498	0.12675	114.514	0.08861
125.553	0.18213	173.262	0.12487	95.2386	0.08712
116.363	0.07063	182.847	0.11116	164.822	0.09602
183.408	0.07987	171.499	0.14722	213.463	0.0488
97.4379	0.12896	190.568	0.10234	22.5962	0.04916
102.885	0.12299	110.272	0.10423	83.4055	0.1143
115.268	0.13403	141.172	0.15829	114.526	0.10728
209.672	0.08349	164.099	0.08663	137.473	0.08575
102.806	0.09805	176.571	0.08085	167.789	0.12599
153.085	0.08898	212.026	0.08241	64.941	0.06568
41.0639	0.11911	117.901	0.08031	124.61	0.06451
47.973	0.06703	200.966	0.17287	74.4987	0.0726
173.051	0.13953	163.869	0.08347	126.218	0.09049
131.608	0.15209	18.2942	0.10102	98.3897	0.05135
122.348	0.11198	30.2938	0.10989	216.328	0.11179
120.696	0.12357	29.6412	0.15334	24.0037	0.05054
109.645	0.10934	92.6037	0.09798	44.9607	0.06886
89.0583	0.0909	46.6068	0.12943	107.742	0.06284
102.358	0.09588	153.248	0.0945	79.8193	0.09034
225.452	0.14673	84.0835	0.15414	79.7832	0.07003
242.496	0.08567	157.816	0.08553	127.612	0.13223
23.0513	0.08851	178.475	0.17476	152.084	0.05349
9.80505	0.11849	184.823	0.09224	57.2952	0.05286
78.9742	0.13502	185.418	0.09245	106.697	0.13417
60.7311	0.08946	153.349	0.12718	126.741	0.05791
149.614	0.11664	182.28	0.12291	141.022	0.07059
118.993	0.09019	118.916	0.10624	143.713	0.05566
56.9181	0.11943	131.749	0.19681	127.49	0.05065
45.4975	0.11057	157.07	0.09803	105.201	0.05299
133.321	0.07808	161.342	0.22959	167.765	0.05119
110.311	0.14386	168.347	0.09813	149.407	0.09036
98.7058	0.0801	180.619	0.11539	167.673	0.04893
75.2806	0.07615	177.781	0.09021	85.4549	0.06986
86.9485	0.09217	198.005	0.09366	103.029	0.08352
53.4578	0.07091	64.3238	0.08743	105.406	0.10492
110.798	0.14905	20.2244	0.18797	181.377	0.10389
102.122	0.09972	19.8423	0.10478	25.0444	0.06634
189.45	0.08946	85.4801	0.13588	62.8293	0.09508
124.971	0.19053	102.459	0.0902	82.8108	0.05288
168.344	0.08842	47.597	0.12131	54.5979	0.09925
150.307	0.06953	157.475	0.16014	130.821	0.09394
70.8213	0.07266	164.225	0.10607	73.83	0.09061
75.7708	0.08051	86.4734	0.11421	57.6203	0.06538
128.623	0.08368	93.4036	0.1024	57.9265	0.08172
122.604	0.07864	186.531	0.11926	74.9248	0.082
77.124	0.11625	108.093	0.08236	111.863	0.08823
89.9712	0.11846	150.078	0.10999	108.37	0.08311
91.057	0.08171	216.209	0.10607	101.721	0.06499
114.38	0.10046	142.799	0.0801	91.8078	0.08596
152.45	0.08968	237.975	0.08743	97.1637	0.08419
132.473	0.07409	152.545	0.09821	118.031	0.05995
175.441	0.09476	175.673	0.10604	103.048	0.14557
83.943	0.18513	222.097	0.08058	114.358	0.09317
25.2798	0.08406	175.703	0.08063	202.515	0.09241
72.1851	0.09007	173.46	0.13561	128.751	0.2085
25.937	0.12189	93.0497	0.16185	138.599	0.05995
76.4262	0.15593	65.741	0.07497	201.927	0.07017
66.3459	0.13554	56.547	0.09881	215.09	0.07375
27.8896	0.15593	87.645	0.09881	28.0219	0.04641
66.2022	0.09711	50.9408	0.10769	19.0713	0.07301
66.672	0.07907	78.6909	0.10482	163.366	0.10117
47.626	0.13015	140.511	0.13422	52.5618	0.09226
60.5793	0.09119	86.8741	0.14058	55.7937	0.07172
121.585	0.08787	72.2656	0.09881	117.356	0.08292
109.794	0.13335	67.9129	0.16332	89.1147	0.06309
124.04	0.0848	123.772	0.11914	131.181	0.06434
114.001	0.10901	155.8	0.12871	97.0563	0.05821
58.7958	0.18221	95.2442	0.14901	166.723	0.05292
12.6769	0.11636	98.8124	0.11105	165.09	0.07245
88.4363	0.18019	108.603	0.09748	181.166	0.07131
18.9083	0.09628	129.687	0.13965	190.607	0.11538
68.5873	0.18824	154.664	0.10304	104.599	0.09782
158.893	0.1481	142.297	0.13236	43.7909	0.05973
141.113	0.32529	131.999	0.07964	75.4873	0.08744
80.3484	0.2093	153.403	0.09613	68.3621	0.07767
176.432	0.10603	183.203	0.13426	104.922	0.10049
92.4481	0.20447	170.038	0.2042	105.838	0.10335
107.063	0.08394	179.609	0.08693	117.702	0.074
130.327	0.20734	207.816	0.12614	162.644	0.17081
87.4689	0.20185	185.554	0.12864	192.295	0.07341
152.959	0.10943	175.39	0.09239	103.892	0.05626
143.101	0.14256	175.786	0.09431	107.273	0.09926
27.5618	0.08071	83.0684	0.08496	143.274	0.04924
46.9173	0.14104	18.9975	0.11273	113.975	0.07885
48.2574	0.1044	41.2706	0.07831	65.0862	0.0715
73.1103	0.07348	96.1337	0.08721	99.8234	0.11228
18.0606	0.18654	58.8122	0.08853	116.771	0.14223
89.283	0.13424	71.3665	0.07663	206.051	0.04971
70.5784	0.12665	38.7723	0.0898	76.8161	0.09894
42.9578	0.1678	98.6143	0.08405	138.793	0.05763
86.1452	0.10815	131.768	0.1646	98.7875	0.15884
55.7034	0.26751	75.592	0.14507	124.499	0.08769
42.2025	0.10623	71.37	0.10465	161.247	0.09647
49.7165	0.08185	98.736	0.0866	149.652	0.10153
56.1405	0.08242	78.1069	0.10234	173.24	0.09239
142.231	0.153	126.201	0.08632	231.587	0.08557
85.0493	0.13127	88.1898	0.09322	230.264	0.08518
80.706	0.08406	118.255	0.07015	41.9544	0.04687
84.8842	0.09789	132.411	0.0822	56.2526	0.06233
155.513	0.08162	165.138	0.13155	70.6904	0.08328
170.669	0.13779	113.644	0.12198	59.3991	0.05409
133.065	0.1115	184.691	0.10193	66.0239	0.111
161.576	0.12849	137.177	0.08075	109.959	0.10438
19.3717	0.07332	132.224	0.08109	105.908	0.08643
8.61272	0.1869	153.343	0.11269	108.935	0.09423
21.8152	0.07052	145.553	0.09759	124.717	0.05561
75.8086	0.10067	183.651	0.08405	135.061	0.09014
52.6266	0.08221	191.972	0.08147	169.773	0.06646
53.0352	0.09438	201.381	0.15368	187.809	0.10335
88.2202	0.10461	171.613	0.09586	38.4882	0.08198
70.6342	0.07332	165.134	0.09085	25.7105	0.06464
166.406	0.08566	183.054	0.13458	54.4996	0.14147
68.806	0.10751	45.18	0.12171	114.187	0.0648
145.427	0.08391	15.5985	0.15052	55.2788	0.05482
92.2888	0.15085	71.3378	0.09221	83.5206	0.04918
160.803	0.11541	50.6447	0.12945	102.441	0.10686
93.3852	0.127	47.3564	0.12667	125.867	0.06043
150.265	0.11214	150.166	0.1739	118.593	0.07436
126.254	0.06609	94.8452	0.10516	157.959	0.1101
122.061	0.10131	62.5368	0.15128	144.581	0.04213
187.917	0.15397	105.178	0.14423	141.331	0.07555
210.276	0.09438	92.5503	0.10117	123.085	0.07082
175.741	0.08752	110.919	0.09467	78.0098	0.05955
26.4316	0.14453	121.028	0.11642	171.775	0.06882
55.957	0.09261	127.96	0.10866	154.4	0.10815
146.561	0.09261	115.126	0.11124	122.594	0.07764
83.2108	0.09261	145.116	0.12538	125.284	0.11542
24.5118	0.10466	129.894	0.12412	168.52	0.11144
128.446	0.18233	148.635	0.08839	161.671	0.10981
43.3345	0.13539	164.679	0.09736	247.235	0.05964
148.648	0.09458	149.332	0.14562	212.324	0.07438
104.188	0.15218	160.026	0.09122	69.1526	0.13673
60.8576	0.08162	163.516	0.16548	146.265	0.08011
92.4048	0.0854	37.1539	0.10259	93.1893	0.07052
24.7729	0.17272	64.7657	0.09749	63.0491	0.10528
70.6476	0.14527	186.048	0.1355	80.886	0.11429
59.2675	0.12335	84.0702	0.07151	166.98	0.08948
41.6713	0.09141	178.423	0.075	114.429	0.11528
59.677	0.07811	188.583	0.11865	144.157	0.0715
51.1164	0.16819	60.2736	0.10806	199.829	0.09279
72.4796	0.13807	118.469	0.1083	159.324	0.07061
58.6208	0.10391	202.539	0.09901	161.935	0.07245
41.6402	0.09048	33.0928	0.12598	162.514	0.07973
36.9215	0.08113	66.5215	0.10365	97.3115	0.05407
41.307	0.07717	177.917	0.13089	43.3421	0.06738
91.1419	0.11473	82.9055	0.09086	67.9498	0.06382
40.7799	0.1258	75.8256	0.14057	188.601	0.06548
83.9367	0.09519	180.322	0.07838	53.2362	0.06763
58.3961	0.20877	103.689	0.17644	88.6424	0.05457
52.8426	0.16347	191.249	0.09242	100.55	0.08872
113.989	0.09048	134.462	0.1083	112.608	0.05209
66.2605	0.27535	251.533	0.12402	150.072	0.04307
106.746	0.18844	169.616	0.10426	34.4215	0.08124
132.429	0.07183	241.227	0.08991	72.413	0.07072
105.85	0.08993	218.237	0.14107	99.7969	0.06506
116.943	0.09118	247.927	0.09901	120.506	0.05687
135.184	0.08866	159.514	0.10944	43.4407	0.06494
168.146	0.09919	257.221	0.10266	52.9189	0.04975
159.976	0.08483	210.274	0.10848	82.3433	0.08885
120.266	0.12189	191.212	0.08018	115.092	0.06126
22.0437	0.09711	174.76	0.07762	120.213	0.06968
102.217	0.11054	256.541	0.11928	106.512	0.07262
67.323	0.11256	203.563	0.10592	153.151	0.06391
45.0163	0.1397	56.0322	0.08519	12.1593	0.14114
56.1319	0.10745	103.087	0.14695	27.4086	0.05415
52.8395	0.12613	87.9827	0.09851	44.1038	0.06619
44.8027	0.1034	175.052	0.10958	78.6592	0.09465
45.9418	0.13058	137.633	0.14473	62.2325	0.05422
90.2766	0.17072	61.9489	0.09851	104.08	0.0935
167.277	0.10181	121.64	0.13309	94.8674	0.12186
113.136	0.11421	144.505	0.11173	129.386	0.07148
125.488	0.09798	74.5057	0.10095	123.005	0.03998
53.2896	0.08481	104.248	0.11833	156.918	0.0722
94.6133	0.11421	91.3462	0.10483	69.9475	0.0984
71.6102	0.11798	167.015	0.0885	79.6217	0.07019
79.2439	0.08736	109.25	0.10596	18.4835	0.07474
124.488	0.09468	100.773	0.18252	127.937	0.11577
122.582	0.1036	100.949	0.1018	102.26	0.09104
63.8011	0.10365	161.265	0.11228	94.9399	0.08236
106.855	0.0905	117.059	0.08188	105.435	0.09861
41.2871	0.06769	219.375	0.1176	73.8144	0.05463
54.4678	0.09869	158.654	0.12597	113.756	0.05509
86.8183	0.10699	197.052	0.11173	146.491	0.06759
43.4946	0.13644	174.354	0.11076	73.9994	0.08398
25.0901	0.15113	160.251	0.12176	138.324	0.07247
27.0504	0.1076	154.662	0.11205	171.726	0.10993
47.7188	0.1195	229.077	0.09117	68.8584	0.14275
49.7641	0.08984	188.098	0.09629	189.167	0.07643
38.9637	0.14763	204.573	0.10027	129.448	0.07029
24.7672	0.14283	164.235	0.0833	109.29	0.11193
31.6594	0.08795	229.698	0.10259	190.491	0.08102
47.3381	0.12175	200.749	0.10673	96.1498	0.09164
128.726	0.08984	124.01	0.10102	74.5421	0.09088
67.6012	0.13508	57.8967	0.14906	46.2283	0.07392
51.8403	0.11724	111.803	0.11134	90.8843	0.07392
108.205	0.10138	98.0667	0.15724	118.302	0.07247
100.923	0.08566	88.6623	0.0903	155.405	0.0744
105.133	0.13312	180.346	0.08019	181.224	0.07033
104.933	0.08657	126.782	0.08662	94.1888	0.04328
14.7099	0.13692	105.96	0.0884	24.5254	0.05907
33.953	0.13271	101.418	0.11105	80.3275	0.04635
65.7898	0.19371	140	0.12259	90.6252	0.04473
134.547	0.09908	191.421	0.0801	100.522	0.04226
33.1329	0.17728	148.331	0.0715	137.174	0.04485
92.8326	0.11117	199.289	0.09363	39.5587	0.08181
82.6863	0.11119	173.428	0.11669	39.9481	0.08097
145.622	0.10594	163.351	0.08741	83.1547	0.07117
79.8544	0.12175	159.913	0.08894	132.679	0.07472
93.4768	0.11724	12.1821	0.10566	160.863	0.08249
57.5336	0.13095	48.1506	0.18082	45.8615	0.0674
156.225	0.16703	27.2686	0.11426	31.1672	0.09766
165.001	0.08104	172.866	0.09674	85.4428	0.07463
94.2329	0.08657	43.1218	0.08921	101.851	0.08057
94.5854	0.11421	31.0646	0.07992	78.3016	0.12822
106.614	0.12669	193.638	0.08847	106.897	0.0697
56.2531	0.10898	117.561	0.17512	174.511	0.07244
40.2509	0.11076	136.04	0.07372	216.087	0.09249
70.7994	0.15257	65.9228	0.08428	192.858	0.07097
57.753	0.07748	158.225	0.12554	231.144	0.09479
162.026	0.10934	140.067	0.10393	28.1641	0.05051
54.6115	0.07432	128.186	0.09221	168.646	0.16548
113.957	0.08626	166.805	0.10032	59.8433	0.06881
66.5287	0.11205	79.0509	0.10807	84.0036	0.07333
67.4988	0.09083	93.6779	0.16052	124.047	0.05935
153.297	0.14875	167.166	0.10352	34.1104	0.04895
77.8389	0.08736	94.8944	0.14797	102.59	0.0782
141.011	0.1406	163.986	0.0756	120.567	0.06434
118.005	0.0936	188.335	0.13206	95.9949	0.14054
114.211	0.1036	175.1	0.07698	112.537	0.06401
201.149	0.08481	105.686	0.10323	79.0362	0.07422
164.296	0.08924	142.733	0.17502	82.3657	0.06823
20.0315	0.12494	141.233	0.08268	33.466	0.10408
19.6648	0.13071	143.571	0.16383	120.614	0.11494
131.554	0.12671	178.007	0.09408	154.279	0.08029
52.1582	0.1679	150.715	0.09689	100.747	0.06823
57.1797	0.13692	166.93	0.11811	137.771	0.08876
52.2447	0.19244	105.938	0.12998	30.3668	0.07306
155.448	0.14335	31.207	0.10898	50.8322	0.09155
76.5786	0.13692	55.354	0.09674	46.3963	0.08183
89.8695	0.24676	174.799	0.14793	89.4232	0.08679
113.784	0.12581	57.7296	0.09998	79.6035	0.10005
18.6347	0.09147	79.6841	0.09998	137.618	0.08583
58.9	0.14336	131.492	0.10658	80.2608	0.08533
126.475	0.17648	104.425	0.10593	118.487	0.09737
111.691	0.11007	194.305	0.13059	50.4069	0.1715
48.4914	0.07208	166.463	0.09431	57.7006	0.09664
44.6521	0.1183	120.875	0.13059	92.7006	0.09972
59.4294	0.07974	137.024	0.09811	200.282	0.06056
123.231	0.16167	200.784	0.10545	168.489	0.07773
96.0314	0.08675	163.603	0.08606	157.178	0.1117
86.7121	0.10738	226.331	0.10247	99.9035	0.12971
45.4395	0.08104	166.8	0.08592	203.983	0.061
24.3023	0.11119	177.02	0.09253	79.4186	0.06955
94.7861	0.15857	17.0659	0.08237	212.93	0.09622
110.618	0.09908	110.068	0.13958	97.8311	0.05146
144.225	0.12206	85.5819	0.10913	104.824	0.11006
26.7469	0.08599	87.0536	0.14309	132.708	0.08903
87.7219	0.09908	95.8881	0.13655	104.855	0.08831
74.852	0.09186	89.4971	0.09586	202.979	0.08259
47.6964	0.08878	112.929	0.14766	195.077	0.0728
148.245	0.1339	78.0298	0.20431	59.1941	0.09132
60.1087	0.12897	97.4696	0.09432	123.054	0.09078
23.4646	0.08469	101.491	0.06981	162.862	0.13302
167.184	0.09908	125.217	0.07257	229.686	0.09411
97.214	0.14428	141.354	0.08685	36.3715	0.12617
69.5356	0.09351	175.158	0.07318	44.6787	0.0914
156.752	0.10288	139.029	0.08277	45.3901	0.12804
118.039	0.09772	155.418	0.13575	57.0546	0.06137
179.742	0.09731	155.38	0.08519	69.8333	0.13147
38.7516	0.14188	170.627	0.08409	118.613	0.08307
63.2287	0.22766	158.625	0.11482	99.8295	0.09678
27.9428	0.18207	166.222	0.17159	89.3647	0.07017
46.2917	0.14846	179.127	0.07536	123.563	0.09305
92.278	0.20455	191.429	0.09432	126.927	0.07558
35.7928	0.14723	171.858	0.09162	136.794	0.07239
88.0935	0.09235	134.409	0.08583	71.1126	0.08179
57.1215	0.09235	95.7748	0.11066	97.9804	0.07102
76.7767	0.07878	56.9062	0.16783	199.081	0.0791
97.6967	0.11258	73.8142	0.07722	120.612	0.10812
57.4464	0.14584	177.154	0.08921	32.8466	0.09992
46.7496	0.10899	157.993	0.13092	36.5703	0.15612
80.9965	0.14997	54.1095	0.08847	130.546	0.08162
53.3197	0.0904	30.4698	0.07372	67.4278	0.17514
81.2512	0.10478	38.1576	0.11151	53.348	0.06406
101.521	0.1052	102.608	0.08428	97.1954	0.08046
163.072	0.21176	81.5972	0.12291	108.681	0.07454
33.6015	0.12556	151.562	0.13104	156.93	0.2066
46.9552	0.07686	196.079	0.12159	149.634	0.06737
55.3579	0.07258	81.8961	0.08592	54.2881	0.08471
70.4685	0.16705	156.579	0.11259	85.6746	0.10783
42.7071	0.07884	170.188	0.07992	121.983	0.07582
111.666	0.07722	98.114	0.10649	64.8085	0.07366
45.2986	0.07572	90.7877	0.10871	116.167	0.08109
147.493	0.08406	106.29	0.07722	74.2326	0.08303
69.366	0.19654	134.039	0.17016	110.481	0.0538
40.0938	0.08767	119.983	0.10785	116.609	0.06025
101.186	0.11456	163.138	0.16613	130.477	0.09198
57.0513	0.08811	131.539	0.12679	120.316	0.05617
70.147	0.09789	208.631	0.14797	146.732	0.06884
197.23	0.12819	144.908	0.1243	138.226	0.07362
66.5056	0.21641	218.043	0.08673	52.9537	0.12715
54.8464	0.15672	176.891	0.16859	79.7386	0.08039
134.887	0.27622	162.784	0.08966	130.078	0.0867
119.615	0.17859	154.176	0.09255	159.492	0.08178
104.872	0.11595	155.961	0.10208	56.3646	0.09999
48.6016	0.08236	159.602	0.07181	77.5975	0.13147
56.1834	0.08104	218.563	0.1355	111.935	0.1324
35.7661	0.12631	174.203	0.11402	121.307	0.06947
72.6164	0.09147	94.5879	0.08871	153.374	0.07086
125.635	0.12256	55.9926	0.08311	94.1249	0.13383
139.38	0.09028	31.5514	0.14003	39.6206	0.11661
153.571	0.08104	36.1706	0.09986	68.9527	0.05885
121.302	0.12178	94.5158	0.08599	54.3798	0.15557
44.6444	0.1195	69.3375	0.11724	89.6234	0.09995
62.9822	0.09653	67.1217	0.11055	116.988	0.10426
16.9649	0.11866	51.5316	0.1106	115.05	0.07913
81.4719	0.12503	108.079	0.09162	143.318	0.12142
66.8085	0.09816	124.333	0.16828	62.7406	0.12049
92.3439	0.11511	94.3543	0.12579	125.093	0.10676
69.6382	0.1195	145.47	0.08311	109.073	0.1272
76.7864	0.08261	156.172	0.08831	86.0622	0.08873
99.8624	0.10175	100.737	0.12504	112.092	0.148
95.0508	0.0893	176.019	0.13027	174.968	0.08433
12.4219	0.15263	119.545	0.08342	56.8118	0.13253
68.4117	0.08669	118.413	0.09812	177.091	0.07265
53.2388	0.12021	171.098	0.17284	193.001	0.08396
38.7554	0.09243	164.548	0.08315	211.937	0.11447
23.353	0.08623	19.3917	0.13273	42.2259	0.06337
119.977	0.07954	184.477	0.09855	9.78958	0.08644
72.2732	0.07615	53.7971	0.09317	17.623	0.08042
49.9792	0.21644	147.978	0.13557	88.5985	0.06492
95.3761	0.11468	129.405	0.09321	64.3486	0.06448
33.6692	0.08163	117.043	0.09873	52.37	0.06214
67.1212	0.1754	105.912	0.08678	136.479	0.1029
97.115	0.11117	194.418	0.12938	102.194	0.05
77.8052	0.07235	155.549	0.07725	60.967	0.09096
80.1657	0.09692	81.3456	0.0845	64.9672	0.07797
90.3844	0.10745	86.3919	0.10816	21.9705	0.08319
82.2906	0.09119	141.712	0.08493	11.7336	0.05303
180.897	0.09007	112.782	0.13557	142.326	0.0703
172.05	0.08691	130.03	0.14175	91.8309	0.09392
63.8704	0.13312	133.403	0.08498	51.3139	0.06916
94.38	0.08231	154.438	0.10236	56.2465	0.05692
77.772	0.08591	188.086	0.13814	89.7708	0.07571
158.616	0.1034	170.391	0.12052	69.5286	0.06261
66.3193	0.11008	71.3041	0.08734	173.279	0.07371
123.132	0.11008	48.5623	0.10142	115.04	0.10745
180.249	0.09986	40.8402	0.12117	54.815	0.05011
80.1528	0.09349	145.734	0.12693	32.97	0.06491
64.8118	0.12243	87.903	0.10271	44.727	0.08258
57.91	0.11391	110.202	0.08316	54.0258	0.07052
38.0237	0.12468	81.212	0.16291	7.69315	0.07066
31.1927	0.0848	112.04	0.14056	92.2417	0.09738
74.4393	0.23779	74.8629	0.07786	80.6815	0.06918
103.852	0.08795	77.6565	0.12288	104.522	0.0918
69.3242	0.14542	122.325	0.07984	122.374	0.09211
83.0659	0.09874	87.0257	0.13251	175.938	0.12679
15.4826	0.08146	120.849	0.09288	197.299	0.09617
48.7162	0.13998	93.0717	0.10996	155.585	0.0867
43.4626	0.15701	133.522	0.09102	148.189	0.05525
65.6058	0.09548	108.629	0.08204	91.79	0.10946
164.256	0.13154	150.606	0.08303	16.2576	0.06487
27.6148	0.10155	133.849	0.1182	53.7528	0.07603
108.129	0.15888	132.446	0.10623	73.8204	0.07869
61.4818	0.29044	146.21	0.12358	76.5566	0.08494
65.2549	0.08971	197.887	0.07609	47.1558	0.06679
38.0441	0.14029	164.097	0.09986	86.0607	0.06043
151.397	0.07264	23.2622	0.10327	56.764	0.09403
89.5411	0.3313	111.668	0.08749	173.632	0.05807
58.0847	0.10576	17.6743	0.08921	116.123	0.05955
73.2537	0.09529	46.992	0.12942	25.9802	0.11279
13.7529	0.1111	56.7315	0.13729	20.1342	0.05105
86.3775	0.10535	178.422	0.0756	103.118	0.05254
92.7612	0.1195	204.46	0.09098	69.33	0.06498
99.0811	0.1253	97.4096	0.08734	95.1353	0.07413
32.155	0.1426	146.033	0.08673	28.6577	0.06521
89.9922	0.09972	163.946	0.09466	58.1822	0.11126
23.5502	0.19557	183.052	0.18339	69.7147	0.06297
13.7873	0.08653	187.551	0.0828	66.3186	0.11144
70.3307	0.09355	26.999	0.11097	67.9656	0.0802
28.8921	0.12509	59.3082	0.1345	131.458	0.11388
28.6671	0.07208	129.951	0.08181	117.224	0.14297
77.0338	0.14695	166.417	0.09674	138.338	0.10752
83.1289	0.14958	155.906	0.09998	40.201	0.05683
54.0986	0.07466	58.114	0.08186	153.098	0.1063
87.9966	0.12711	54.3178	0.14215	177.708	0.17774
96.467	0.07361	182.419	0.13059	124.304	0.10773
130.958	0.14104	72.2403	0.12694	64.8313	0.08209
9.89259	0.55005	150.995	0.08592	95.5117	0.05782
143.939	0.11492	162.089	0.10898	83.2733	0.06894
120.868	0.15218	194.98	0.10245	72.7208	0.07193
88.8409	0.11157	88.1167	0.11075	98.0637	0.06709
58.2478	0.10441	137.363	0.10316	121.883	0.07451
107.729	0.14453	233.424	0.16669	28.3997	0.09743
88.7909	0.07096	165.855	0.10433	46.3527	0.09398
178.069	0.11416	208.988	0.09998	55.4481	0.10252
125.583	0.09292	221.641	0.10247	121.065	0.07383
191.954	0.11674	180.778	0.13614	53.0236	0.09913
88.8524	0.12599	170.981	0.08536	72.8173	0.08824
217.276	0.10133	161.333	0.08228	151.741	0.08975
171.955	0.09581	199.359	0.09435	118.932	0.08187
121.708	0.08451	152.773	0.08391	140.953	0.12469
42.6352	0.08045	204.295	0.11649	154.829	0.07932
49.8622	0.13145	77.2926	0.15056	83.6679	0.08987
97.4323	0.12819	66.8306	0.07998	149.302	0.07733
159.719	0.1577	91.9529	0.07497	29.0619	0.06676
134.594	0.11053	80.4064	0.10322	105.182	0.10843
111.468	0.19053	168.97	0.08275	57.4899	0.08891
79.4031	0.08224	123.342	0.08871	115.898	0.14563
78.9533	0.09019	143.452	0.07733	84.3148	0.07045
29.2283	0.10151	199.141	0.09657	73.1726	0.0643
41.7625	0.08946	193.472	0.09776	42.9092	0.08749
115.699	0.14557	134.457	0.09014	53.7283	0.11933
182.062	0.11421	57.5251	0.08258	91.7422	0.06667
60.6335	0.07974	123.584	0.09263	87.1792	0.08988
40.1779	0.07768	46.3491	0.11448	104.937	0.11368
28.902	0.11716	157.111	0.14213	149.264	0.11469
36.1523	0.13095	110.319	0.09459	128.784	0.09417
91.9513	0.11008	82.8881	0.11865	128.593	0.12408
72.2091	0.10638	78.2075	0.1416	112.782	0.06697
45.6175	0.18647	156.57	0.08762	24.7996	0.20383
95.4065	0.12074	144.485	0.09305	118.369	0.18628
47.7078	0.13508	135.758	0.12314	99.9558	0.19226
42.4704	0.18609	125.381	0.10824	75.6846	0.05957
65.1193	0.1462	166.4	0.12809	21.4654	0.07173
134.586	0.10146	134.859	0.09105	113.309	0.10172
19.0425	0.08231	142.415	0.22618	148.371	0.08469
99.5313	0.07936	145.216	0.08615	94.2842	0.0672
89.9652	0.16946	229.209	0.09204	119.838	0.10123
81.1428	0.08402	44.0333	0.09651	72.5647	0.05951
73.2332	0.09456	120.713	0.09975	68.2513	0.0666
103.123	0.13748	101.428	0.14712	86.7857	0.09376
82.2082	0.07974	105.002	0.08117	102.237	0.0574
18.2625	0.09578	80.3087	0.10152	81.0555	0.08879
37.6396	0.08498	70.0126	0.09019	19.2548	0.10948
123.891	0.07854	72.207	0.09332	146.522	0.11057
95.5767	0.10655	59.3875	0.10727	44.9349	0.10576
83.4027	0.12713	99.6731	0.09332	69.2585	0.11309
47.1057	0.08929	80.7822	0.09332	41.6004	0.08794
141.753	0.09861	117.77	0.16173	70.4125	0.08794
93.2477	0.11357	97.9768	0.11858	63.266	0.09994
58.8696	0.08431	140.704	0.11411	88.4573	0.06521
90.0056	0.09818	88.5119	0.07891	112.655	0.12618
62.5045	0.09147	104.781	0.14587	140.33	0.08384
83.4978	0.10284	117.639	0.09189	45.5143	0.08207
39.6377	0.10738	75.4238	0.1156	66.7891	0.09213
59.4693	0.13617	90.0525	0.10553	84.7206	0.06836
86.8477	0.10814	108.024	0.10152	126.245	0.08938
129.172	0.10594	98.0593	0.10758	40.8713	0.09683
91.9885	0.08945	125.964	0.17066	62.5654	0.085
67.8721	0.11307	136.565	0.09078	47.6243	0.07869
184.018	0.08214	93.4575	0.09651	33.3884	0.08857
39.8855	0.13342	136.875	0.12268	52.6478	0.13082
51.5775	0.08195	110.379	0.14066	71.0667	0.06048
40.6591	0.08566	125.76	0.11051	161.049	0.05813
73.9829	0.16662	138.438	0.10939	60.7916	0.05144
60.1405	0.13312	127.08	0.08616	21.7333	0.12053
21.1112	0.08104	162.46	0.09189	101.79	0.07757
89.8995	0.09819	145.047	0.1584	92.1723	0.04484
80.6008	0.08657	171.875	0.08265	118.258	0.08324
21.3795	0.21653	143.31	0.15578	77.426	0.05545
151.889	0.10435	139.237	0.12389	133.319	0.07553
126.5	0.09529	153.582	0.07811	107.388	0.09558
64.3421	0.09438	144.389	0.15777	34.3383	0.20901
66.5136	0.11116	168.27	0.07464	41.4291	0.06409
32.369	0.09529	174.635	0.20824	113.888	0.08604
127.25	0.09553	148.061	0.19377	72.8389	0.09734
66.3375	0.10222	154.841	0.15273	119.902	0.08327
126.654	0.10849	145.186	0.13246	115.735	0.10949
32.5195	0.1454	32.7668	0.10783	141.898	0.1315
80.4692	0.11767	38.5714	0.10161	124.446	0.06518
73.5188	0.13788	94.3217	0.10316	54.9298	0.06257
134.428	0.10267	139.361	0.17238	76.5867	0.08109
77.0436	0.15775	54.2988	0.08815	128.385	0.0777
167.58	0.17678	120.593	0.09775	190.402	0.11487
125.717	0.14708	139.106	0.08779	125.258	0.08472
134.637	0.13825	131.07	0.0841	85.5804	0.06549
151.119	0.1097	199.564	0.15055	41.0182	0.11797
178.098	0.20112	174.677	0.09775	145.344	0.0835
194.534	0.21694	199.953	0.16311	13.8309	0.13398
220.429	0.12179	170.972	0.10316	134.005	0.13381
37.0988	0.12928	85.0465	0.10482	93.0598	0.18077
114.244	0.10026	60.4695	0.0822	134.831	0.11282
47.3576	0.16622	31.4303	0.08359	108.088	0.09682
36.7172	0.11608	65.2183	0.10618	91.885	0.06067
112.36	0.18255	82.9451	0.10146	48.9165	0.09767
159.664	0.10862	52.3976	0.09794	96.0452	0.06971
184.886	0.11523	126.238	0.09847	156.16	0.07335
151.33	0.15888	74.8888	0.08784	96.5587	0.05371
65.4028	0.12439	95.5503	0.09024	35.0884	0.08994
51.1658	0.14347	102.003	0.10482	190.229	0.09295
151.721	0.17567	74.1479	0.09568	193.188	0.12704
127.29	0.10221	110.868	0.13244	163.514	0.15105
65.1984	0.14097	140.548	0.10304	118.901	0.15946
58.9016	0.2558	154.585	0.12691	15.4108	0.0874
197.126	0.1066	172.715	0.08598	58.399	0.06539
69.6729	0.22568	161.785	0.088	38.9278	0.09433
83.979	0.1276	19.3898	0.09385	65.8726	0.0741
181.286	0.10443	198.937	0.08112	11.5884	0.07843
68.5549	0.12689	165.87	0.07538	55.5303	0.05797
79.9531	0.13117	96.0204	0.07838	25.5276	0.07511
168.998	0.16763	74.2955	0.07525	57.2933	0.10459
102.906	0.15002	146.973	0.08878	113.571	0.07459
97.5706	0.16971	164.522	0.11105	43.2382	0.15373
81.0491	0.21959	105.998	0.07395	106.672	0.07044
86.3451	0.16407	196.765	0.07861	223.718	0.14621
181.75	0.14046	125.874	0.09385	142.745	0.08978
158.874	0.14097	143.511	0.07959	215.03	0.09707
132.211	0.15248	159.122	0.13193	182.686	0.11168
107.383	0.11884	205.548	0.08897	18.2593	0.11438
110.623	0.13923	138.231	0.10532	47.8945	0.10246
110.808	0.1496	64.2962	0.08823	23.0408	0.1437
154.858	0.14097	32.1348	0.09689	13.543	0.0596
126.422	0.16407	42.9935	0.15426	43.3065	0.06251
217.956	0.15419	180.776	0.07525	73.8021	0.07656
144.22	0.17936	166.56	0.13204	69.567	0.05489
124.814	0.14097	40.1497	0.15426	115.959	0.0799
185.491	0.09281	55.7411	0.15426	65.3914	0.06722
178.698	0.11873	116.309	0.16828	63.5091	0.08693
137.748	0.12689	92.4508	0.16754	85.8045	0.09653
132.896	0.16437	55.9306	0.13678	180.545	0.126
156.139	0.09735	113.951	0.10954	25.7657	0.10009
183.849	0.15888	81.2234	0.1461	102.968	0.08169
143.087	0.16636	167.454	0.10205	145.763	0.09981
166.088	0.14046	67.4124	0.1289	123.833	0.08732
163.704	0.16964	162.045	0.14918	60.3066	0.08304
243.099	0.13788	188.699	0.15256	19.097	0.07307
206.867	0.18931	80.0458	0.0751	87.1696	0.09134
192.515	0.20349	80.5388	0.10863	45.0468	0.09901
206.967	0.15902	147.63	0.1248	63.3515	0.06683
187.484	0.19724	127.147	0.10532	48.8645	0.10921
[truncated: 15,302 more rows]
