# Supplementary material for: Network instability dynamics drive a transient bursting period in the developing hippocampus in vivo
Source: eLife. 2022 Dec 19;11:e82756. doi: 10.7554/eLife.82756 (PMC9762703; doi:10.7554/eLife.82756)
Supplement: Figure 5—source data 1. [file elife-82756-fig5-data1.xlsx]

## Sheet: 1e#1
Two-photon Ca2+ imaging in CA1
Cre Line:	Emx1
Indicator:	GCaMP6s
Parameter:	Global similarity of activity patterns
Unit:
related to	Figure 5B
P4	P11	P18
0.0160736	0.0278722	0.0479379
0.0178075	0.0137608	0.0474751
0.0172944	0.00770468	0.0666875
0.0270564	0.0103679	0.0701142
0.0331565	0.0130279	0.0441734
0.0196666	0.0224825	0.0189917
0.0204308	0.00958798	0.0899266
0.053632	0.0141276	0.031947
0.119681	0.0272784	0.0350799
0.179296	0.0272301	0.0926826
0.0293581	0.012494	0.0706778
0.100908		0.0399446
0.0842259
0.0368463
0.0537185
0.0693011
0.027603
0.113225
0.0330243

## Sheet: 1e#2
Two-photon Ca2+ imaging in CA1
Cre Line:	Emx1
Indicator:	GCaMP6s
Parameter:	Number of motifs
Unit:
related to	Figure 5C
P4	P11	P18
4	7	3
6	2	11
8	0	9
6	1	12
9	2	8
5	1	1
8	0	11
8	3	5
6	1	2
4	9	6
3	2	11
4		5
7
4
8
8
5
6
4

## Sheet: 1e#3
Two-photon Ca2+ imaging in CA1
Cre Line:	Emx1
Indicator:	GCaMP6s
Parameter:	Fraction of patterns in motifs
Unit:	%
related to	Figure 5D
P4	P11	P18
23.4673	21.0822	43.3333
14.359	6.64962	23.0197
11.9213	0	25.8235
15.8436	5.76923	24.0278
14.2632	9.79938	24.1226
14.8329	64.1129	76.8116
16.9098	0	24.6553
26.7206	8.98123	24.9385
17.5858	8.2017	47.2186
24.2701	17.6132	25.7161
14.5606	40.0596	20.3913
30.8071		28.9033
17.4156
20.9205
10.745
11.4062
14.183
19.914
17.9975
