# Supplementary material for: Network instability dynamics drive a transient bursting period in the developing hippocampus in vivo
Source: eLife. 2022 Dec 19;11:e82756. doi: 10.7554/eLife.82756 (PMC9762703; doi:10.7554/eLife.82756)
Supplement: Figure 6—source data 1. [file elife-82756-fig6-data1.xlsx]

## Sheet: 1f#1
Two-photon Ca2+ imaging in CA1
Cre Line:	Emx1
Indicator:	GCaMP6s
Age:	P11
Parameter:	Respiration rate
Unit:	1/min
related to	Figure 6B
N2O	Unanesthetized
156	186
204	186
192	216
216	204
216	216
174	204
174	168
186	156
168	156
174	174
144	192
204	192

## Sheet: 1f#2
Two-photon Ca2+ imaging in CA1
Cre Line:	Emx1
Indicator:	GCaMP6s
Age:	P11
Parameter:	Heartbeat
Unit:	1/min
related to	Figure 6C
N2O	Unanesthetized
300	348
390	348
414	348
414	390
348	372
330	312
372	282
312	330
330	348
282	312
390	330

## Sheet: 1f#3
Two-photon Ca2+ imaging in CA1
Cre Line:	Emx1
Indicator:	GCaMP6s
Age:	P11
Parameter:	Movement periods, total time
Unit:	%
related to	Figure 6D
N2O	Unanesthetized
1.37493	11.0112
3.59535	23.828
3.80684	22.959
3.86039	19.1752
3.13712	20.9024
4.12407	10.8565
2.26718	24.9207
1.97392	26.7889
3.24286	3.87734
4.93479	7.61368
9.34085	23.8145
3.59535	9.02362

## Sheet: 1f#4
Two-photon Ca2+ imaging in CA1
Cre Line:	Emx1
Indicator:	GCaMP6s
Age:	P11
Parameter:	Movement periods, occurence frequency
Unit:	1/min
related to	Results section
N2O	Unanesthetized
0.761099	2.86451
2.24101	5.49683
1.43763	7.68221
1.90275	9.55603
1.94503	5.11628
1.35307	1.90275
1.58962	6.21564
1.14165	6.72304
1.98732	2.32558
2.07188	2.95983
4.14376	7.10889
1.98732	3.46723

## Sheet: 1f#5
Two-photon Ca2+ imaging in CA1
Cre Line:	Emx1
Indicator:	GCaMP6s
Age:	P11
Parameter:	Movement periods, duration
Unit:	s
related to	Results section
N2O	Unanesthetized
1.08333	2.30519
0.962264	2.59615
1.57353	1.78873
1.21667	1.20354
0.967391	2.45041
1.82812	3.41111
0.855263	2.40476
1.03704	2.38994
0.978723	1
1.42857	1.54286
1.35204	2.00882
1.08511	1.55488

## Sheet: 1f#6
Two-photon Ca2+ imaging in CA1
Cre Line:	Emx1
Indicator:	GCaMP6s
Age:	P11
Parameter:	Network burst time fraction
Unit:	%
related to	Figure 6G
N2O	Unanesthetized
20.5583	25.473
9.85018	19.8922
29.1033	20.3454
28.1931	24.5052
21.8179	22.5443
22.3438	19.8055
18.6842	29.9487
19.6131	25.9955
17.506	22.009
15.6991	13.8256
20.2916	21.3406
20.8419	16.5523

## Sheet: 1f#7
Two-photon Ca2+ imaging in CA1
Cre Line:	Emx1
Indicator:	GCaMP6s
Age:	P11
Parameter:	Fraction of significant pairs for STTC
Unit:	%
related to	Figure 6H
N2O	Unanesthetized
10.7435	9.54089
5.17598	4.43064
5.81549	2.46365
6.70565	3.96547
11.4792	5.37535
8.24823	6.82303
18.3571	9.14027
9.10067	12.0268
10.0714	5.74995
3.96973	3.56381
5.98199	3.62074
8.25057	4.82981

## Sheet: 1f#8
Two-photon Ca2+ imaging in CA1
Cre Line:	Emx1
Indicator:	GCaMP6s
Age:	P11
Parameter:	CaT frequncy
Unit:	1/min
related to	Figure 6-figure supplement 2C
N2O	Unanesthetized
1.99934	2.35762
1.88816	3.0938
3.51398	2.33338
3.98945	3.41479
3.37853	4.20285
3.08597	3.4847
2.0213	3.62554
1.8902	3.73517
1.63954	3.21665
1.62757	1.94878
1.72615	2.30688
3.42959	3.86808

## Sheet: 1f#9
Two-photon Ca2+ imaging in CA1
Cre Line:	Emx1
Indicator:	GCaMP6s
Age:	P11
Parameter:	Gini of CaT frequncies
Unit:
related to	Figure 6-figure supplement 2D
N2O	Unanesthetized
0.25896	0.286205
0.280755	0.334192
0.242371	0.298445
0.210402	0.225512
0.268591	0.419473
0.396819	0.363367
0.248818	0.302594
0.23418	0.268655
0.278993	0.263308
0.322884	0.313787
0.350669	0.41476
0.344563	0.307164

## Sheet: 1f#10
Two-photon Ca2+ imaging in CA1
Cre Line:	Emx1
Indicator:	GCaMP6s
Age:	P11
Parameter:	Time in continuous activity
Unit:	%
related to	Figure 6-figure supplement 2E
N2O	Unanesthetized
3.19149	0
0	0
23.3766	0
22.9508	16.1765
19.8113	50.8197
1.55039	6.34921
0	6.45161
1.45985	3.22581
0	12.7273
0	0
0	0
13.2231	36.8852

[truncated: 6 more sheets: 1f#11, 1f#12, 1f#13, 1f#14, 1f#15, 1f#16]
